# Supplementary material
Source: PubMed Central journal article supplement (PMC3131435)

# Diastereo- and Enantioselective Ruthenium Catalyzed Hydrohydroxyalkylation of 2-Silyl-Butadienes: Carbonyl *syn*-Crotylation from the Alcohol Oxidation Level

Jason R. Zbieg, Joseph Moran and Michael J. Krische\*

University of Texas at Austin, Department of Chemistry and Biochemistry, Austin, TX 78712

*mkrische@mail.utexas.edu*

## Supporting Information

| Table of Contents                                                                     | pg  |
|---------------------------------------------------------------------------------------|-----|
| General Information                                                                   | S1  |
| Spectroscopy and Spectrometry                                                         | S1  |
| Procedures and Spectroscopic Data for Alcohols <b>4a-4j</b>                           | S3  |
| Procedure and Spectroscopic Data for Alcohol <b>7a</b>                                | S55 |
| Procedure and Spectroscopic Data for <i>anti,syn</i> -stereotriads <b>5a,5b,6a,6b</b> | S58 |

**General Information:** All reactions were run under an atmosphere of argon. Tetrahydrofuran (THF) and toluene were obtained from Pure-Solv MD-5 Solvent Purification System (Innovative Technology). Anhydrous solvents were transferred by oven-dried syringe. Sealed tubes (13×100 mm<sup>2</sup>) were purchased from Fisher Scientific (catalog number 14-959-35C) and were dried in an oven overnight and cooled under a stream of argon prior to use. RuHCl(CO)(PPh<sub>3</sub>)<sub>3</sub> and diene **1** were prepared according to literature procedure.<sup>1,2</sup> All ligands were used as received from Strem Chemicals Inc. Alcohols were purified by distillation or recrystallization immediately prior to use. Preparative column chromatography employing silica gel was performed according to the method of Still.<sup>3</sup> Analytical thin-layer chromatography (TLC) was carried out using 0.25 mm commercial silica gel plates (Dynamic Adsorbents F<sub>254</sub>). Visualization was accomplished with UV light followed by dipping in a *p*-anisaldehyde solution and heating. Purification of reaction products was carried out by flash column chromatography using Silicycle silica gel (40-63 μm). Microwave reactions were run in a CEM explorer 48 automated microwave synthesizer.

**Spectroscopy and Spectrometry:** Infrared spectra were recorded on a Thermo Nicolet 380 spectrometer. High-resolution mass spectra (HRMS) were obtained on a Karatos MS9 and are reported as *m/z* (relative intensity). Accurate masses are reported for the molecular ion (M+H, M or M-H) or a suitable fragment ion. <sup>1</sup>H NMR spectra were recorded on a Varian Gemini (400 MHz) spectrometer at ambient temperature unless

(1) Joseph, T. *et al.*, *J. Mol. Catal. A* **2003**, 206, 13.

(2) Welker, M., *J. Org. Chem.*, **2009**, 74, 8290.

(3) Still, W. C.; Kahn, M.; Mitra, A. *J. Org. Chem.* **1978**, 43, 2923.

otherwise noted. Chemical shifts are reported in delta ( $\delta$ ) units, parts per million (ppm) downfield from trimethylsilane or ppm relative to the center of the singlet at 7.26 ppm for deuteriochloroform. Data are reported as: multiplicity (s = singlet, d = doublet, t = triplet, q = quartet, m = multiplet), integration and coupling constant(s) in Hz.  $^{13}\text{C}$  NMR spectra were recorded on a Varian Gemini (100 MHz) spectrometer and were routinely run with broadband decoupling. Chemical shifts are reported in ppm from tetramethylsilane, with the residual solvent resonance employed as the internal standard ( $\text{CDCl}_3$  at 77.0 ppm).

---

## Experimental Procedures and Spectroscopic Data for Adduct 4a-4i

### (1R,2R)-3-(dimethyl(phenyl)silyl)-2-methyl-1-phenylbut-3-en-1-ol (4a)

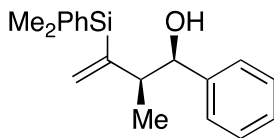

**From Alcohol Oxidation Level:** To a resealable pressure tube (13 x 100 mm) equipped with a magnetic stir bar was added  $\text{RuHCl}(\text{CO})(\text{PPh}_3)_3$  (14.3 mg, 0.015 mmol, 5 mol%) and (*R*)-DM-SEGPPOS (10.8 mg, 0.015 mmol, 5 mol%). The tube was sealed with a rubber septum and purged with nitrogen. Toluene (0.15 mL, 2.0 M concentration with respect to alcohol), diene **1** (113 mg, 0.60 mmol, 200 mol%) and alcohol **2a** (32.4 mg, 0.30 mmol, 100 mol%) were added and the rubber septum was quickly replaced with a screw cap. The mixture was heated at 95 °C (oil bath temperature) for 48 hrs, at which point the reaction mixture was allowed to cool to ambient temperature. The reaction mixture was concentrated *in vacuo* and purified by flash column chromatography ( $\text{SiO}_2$ ; 3% EtOAc/hexanes) to furnish the title compound (72.0 mg, 0.24 mmol, *syn:anti* = 13:1) as a colorless oil in 81% yield.

**From Aldehyde Oxidation Level:** To a resealable pressure tube (13 x 100 mm) equipped with a magnetic stir bar was added  $\text{RuHCl}(\text{CO})(\text{PPh}_3)_3$  (14.3 mg, 0.015 mmol, 5 mol%) and (*R*)-DM-SEGPPOS (10.8 mg, 0.015 mmol, 5 mol%). The tube was sealed with a rubber septum and purged with nitrogen. Toluene (0.15 mL, 2.0 M concentration with respect to aldehyde), diene **1** (113 mg, 0.60 mmol, 200 mol%), aldehyde **3a** (31.8 mg, 0.30 mmol, 100 mol%) and isopropanol (46  $\mu\text{L}$ , 0.60 mmol, 200 mol%) were added and the rubber septum was quickly replaced with a screw cap. The mixture was heated at 95 °C (oil bath temperature) for 48 hrs, at which point the reaction mixture was allowed to cool to ambient temperature. The reaction mixture was concentrated *in vacuo* and purified by flash column chromatography ( $\text{SiO}_2$ ; 3% EtOAc/hexanes) to furnish the title compound (67.8 mg, 0.23 mmol, *syn:anti* = 12:1) as a colorless oil in 76% yield.

**$^1\text{H NMR}$**  (400 MHz,  $\text{CDCl}_3$ ):  $\delta$  7.55–7.52 (m, 2H), 7.40–7.13 (m, 8H), 5.89 (dd,  $J = 2.2, 1.2$  Hz, 1H), 5.64 (d,  $J = 2.2$  Hz, 1H), 4.54 (dd,  $J = 4.1, 2.6$  Hz, 1H), 2.66 (qdd,  $J = 6.9, 4.1, 1.2$  Hz, 1H), 1.80 (d,  $J = 2.6$  Hz, 1H), 0.86 (d,  $J = 6.9$  Hz, 3H), 0.34 (s, 6H).

**$^{13}\text{C NMR}$**  (100 MHz,  $\text{CDCl}_3$ ):  $\delta$  153.6, 143.1, 137.9, 134.1, 129.3, 128.0 (2C), 127.5, 126.9, 126.1, 74.5, 44.9, 12.9, -2.6, -2.7.

**HRMS** (CI) Calcd. for  $\text{C}_{19}\text{H}_{24}\text{OSi}$  ( $\text{M}^+$ ): 296.1596, Found: 296.1595.

$[\alpha]_{\text{D}}^{25} = -20$  ( $c = 1.0$ ,  $\text{CH}_2\text{Cl}_2$ ).

**FTIR** (neat): 2957, 1450, 1427, 1248, 1108, 908, 814, 730, 698  $\text{cm}^{-1}$ .

**HPLC** (The alcohol was converted to the 4-nitrobenzoate ester for analysis; Chiralcel AD-H/AD-H column, hexanes:*i*-PrOH = 99:1, 1.0 mL/min, 254 nm),  $t_{\text{major}} = 23.1$  min,  $t_{\text{minor}} = 19.1$  min; ee = 87%

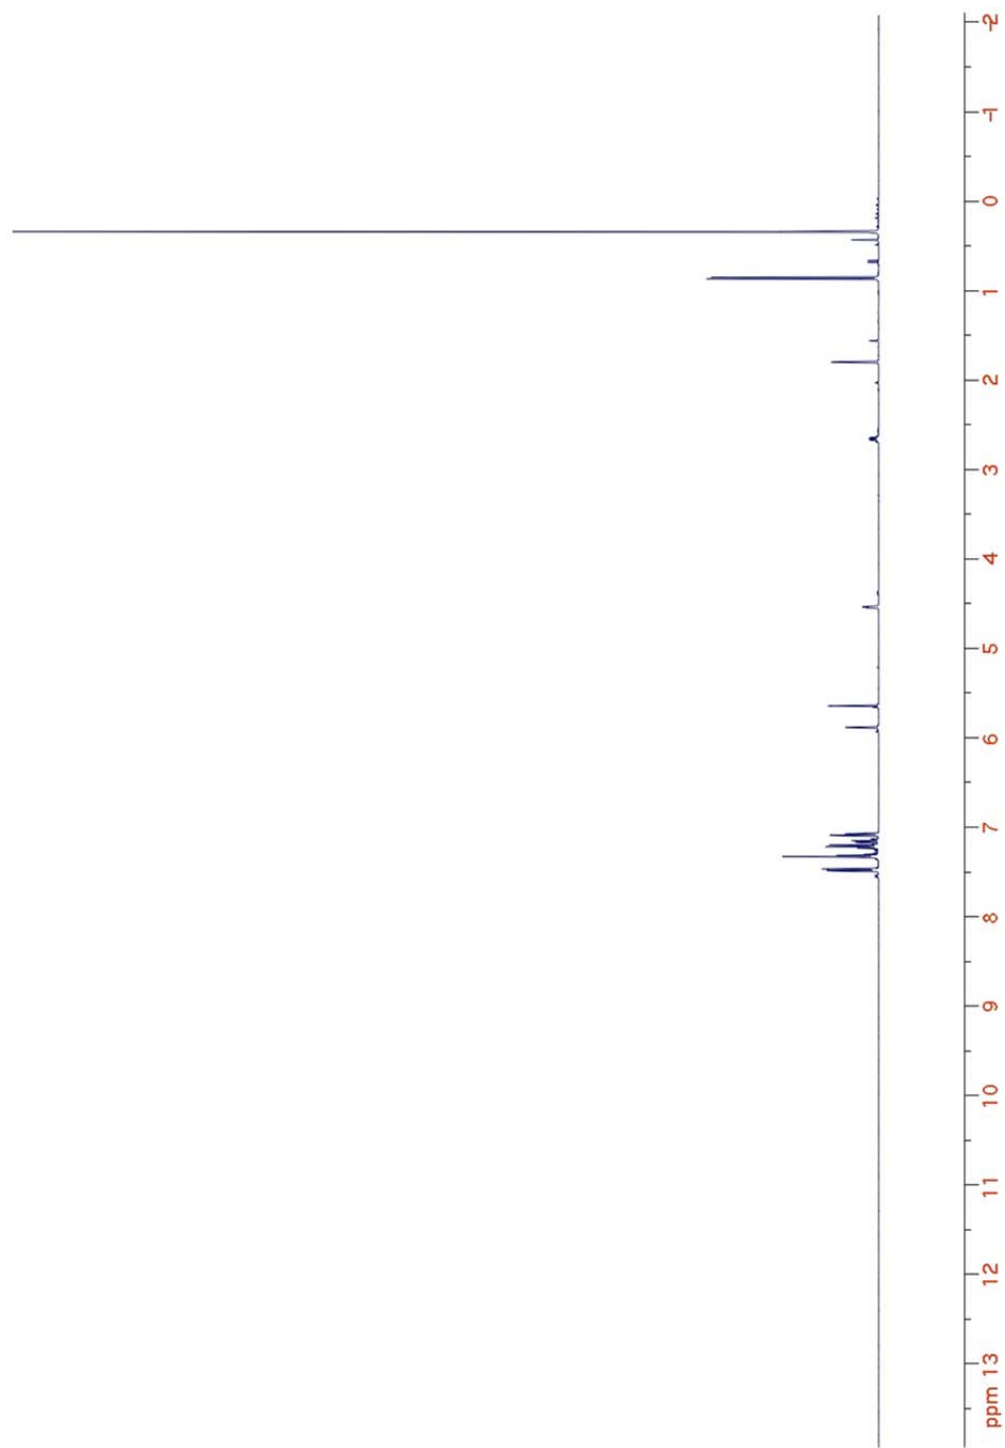

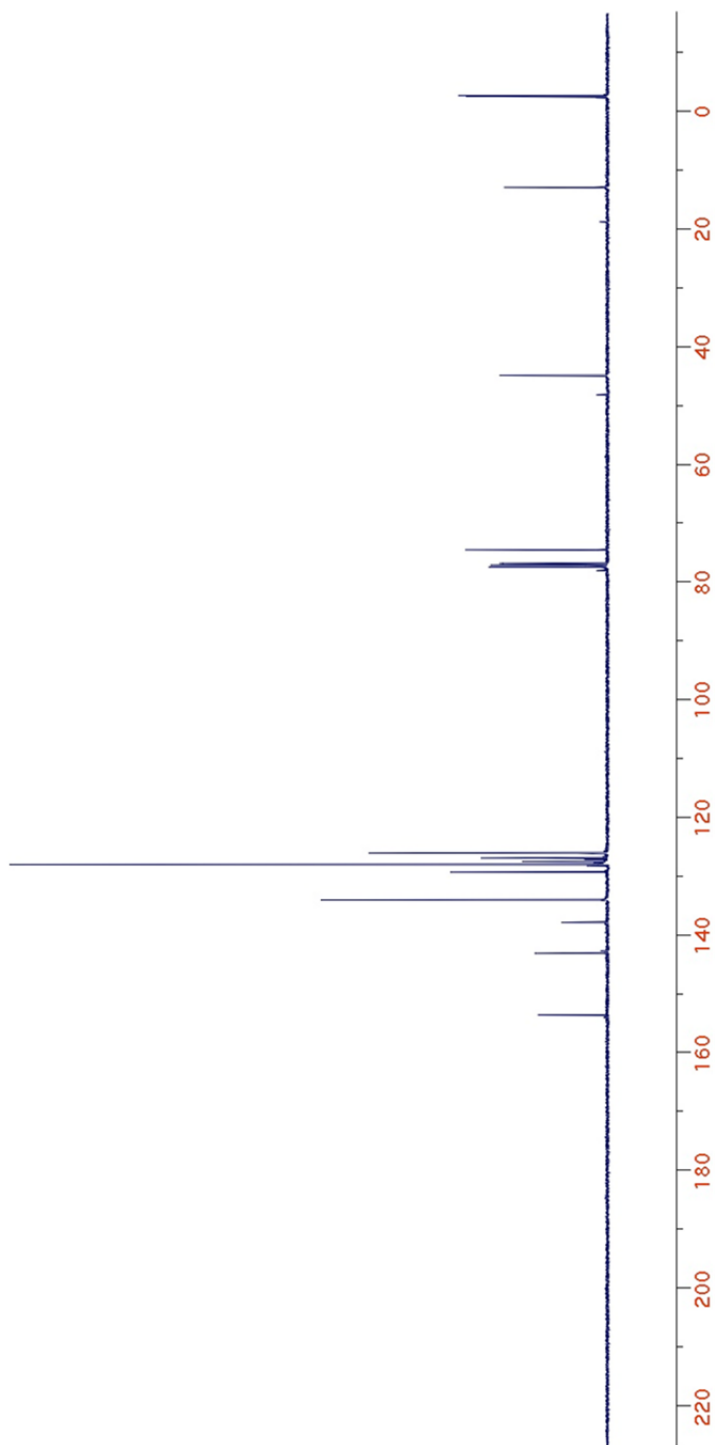

## Racemic

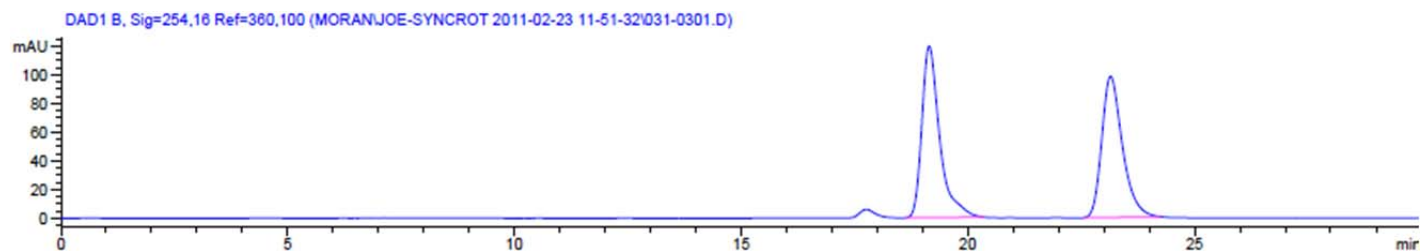

Signal 2: DAD1 B, Sig=254,16 Ref=360,100

| Peak # | RetTime [min] | Type | Width [min] | Area [mAU*s] | Height [mAU] | Area %  |
|--------|---------------|------|-------------|--------------|--------------|---------|
| 1      | 19.145        | BB   | 0.4103      | 3283.78076   | 119.60905    | 51.1861 |
| 2      | 23.145        | BB   | 0.4809      | 3131.59302   | 98.49988     | 48.8139 |

Totals : 6415.37378 218.10893

## (R)-DM-SEGPPOS (from alcohol oxidation level)

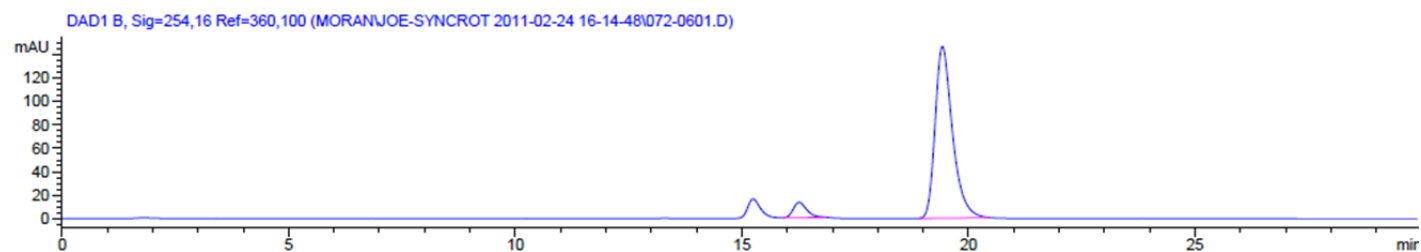

Signal 2: DAD1 B, Sig=254,16 Ref=360,100

| Peak # | RetTime [min] | Type | Width [min] | Area [mAU*s] | Height [mAU] | Area %  |
|--------|---------------|------|-------------|--------------|--------------|---------|
| 1      | 16.259        | BB   | 0.3187      | 280.67160    | 13.27373     | 6.6723  |
| 2      | 19.421        | BB   | 0.4018      | 3925.81860   | 146.88321    | 93.3277 |

Totals : 4206.49020 160.15694

**(R)-DM-SEGPHOS (from aldehyde oxidation level)**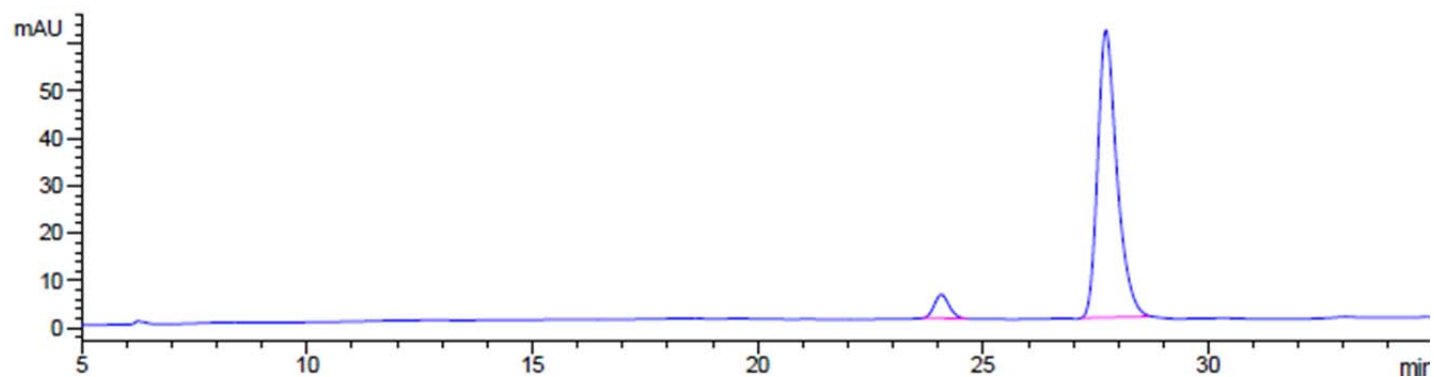

Signal 2: DAD1 B, Sig=254,16 Ref=360,100

| Peak #   | RetTime [min] | Type | Width [min] | Area [mAU*s] | Height [mAU] | Area %  |
|----------|---------------|------|-------------|--------------|--------------|---------|
| 1        | 24.070        | BB   | 0.3598      | 119.40488    | 5.08713      | 6.2115  |
| 2        | 27.722        | BB   | 0.4447      | 1802.90039   | 60.67561     | 93.7885 |
| Totals : |               |      |             | 1922.30527   | 65.76274     |         |

**(1*R*,2*R*)-3-(dimethyl(phenyl)silyl)-1-(4-(dimethylamino)phenyl)-2-methylbut-3-en-1-ol (4b)**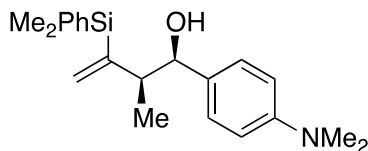

**From Alcohol Oxidation Level:** To a resealable pressure tube (13 x 100 mm) equipped with a magnetic stir bar was added RuHCl(CO)(PPh<sub>3</sub>)<sub>3</sub> (14.3 mg, 0.015 mmol, 5 mol%) and (*R*)-DM-SEGPHOS (10.8 mg, 0.015 mmol, 5 mol%). The tube was sealed with a rubber septum and purged with nitrogen. Toluene (0.15 mL, 2.0 M concentration with respect to alcohol), diene **1** (113 mg, 0.60 mmol, 200 mol%) and alcohol **2b** (45 mg, 0.30 mmol, 100 mol%) were added and the rubber septum was quickly replaced with a screw cap. The mixture was heated at 95°C (oil bath temperature) for 48 hrs, at which point the reaction mixture was allowed to cool to ambient temperature. The reaction mixture was concentrated *in vacuo* and purified by flash column chromatography (SiO<sub>2</sub>; 0-10% EtOAc/hexanes) to furnish the title compound (88 mg, 0.26 mmol, *syn:anti* = ≥20:1) as a colorless oil in 87% yield.

**From Aldehyde Oxidation Level:** To a resealable pressure tube (13 x 100 mm) equipped with a magnetic stir bar was added RuHCl(CO)(PPh<sub>3</sub>)<sub>3</sub> (14.3 mg, 0.015 mmol, 5 mol%), (*R*)-DM-SEGPHOS (10.8 mg, 0.015 mmol, 5 mol%) and aldehyde **3b** (45 mg, 0.30 mmol, 100 mol%). The tube was sealed with a rubber septum and purged with nitrogen. Toluene (0.15 mL, 2.0 M concentration with respect to aldehyde), diene **1** (113 mg, 0.60 mmol, 200 mol%) and isopropanol (46 μL, 0.60 mmol, 200 mol%) were added and the rubber septum was quickly replaced with a screw cap. The mixture was heated at 95°C (oil bath temperature) for 48 hrs, at which point the reaction mixture was allowed to cool to ambient temperature. The reaction mixture was concentrated *in vacuo* and purified by flash column chromatography (SiO<sub>2</sub>; 0-10% EtOAc/hexanes) to furnish the title compound (81 mg, 0.24 mmol, *syn:anti* = 19:1) as a colorless oil in 80% yield.

**<sup>1</sup>H NMR** (400 MHz, CDCl<sub>3</sub>): 7.51-7.48 (m, 2H), 7.40-7.30 (m, 3H), 6.99 (d, *J* = 8.8 Hz, 2H), 6.39 (d, *J* = 8.8 Hz, 2H), 5.89 (dd, *J* = 2.2, 1.2 Hz, 1H), 5.63 (d, *J* = 2.2, 1H), 4.52 (dd, *J* = 4.8, 2.6 Hz, 1H), 2.90 (s, 6H), 2.70-2.62 (m, 1H), 1.69 (d, *J* = 2.6 Hz, 1H), 0.93 (d, *J* = 6.8 Hz, 3H), 0.36 (s, 6H).

**<sup>13</sup>C NMR** (100 MHz, CDCl<sub>3</sub>): δ 153.7, 149.7, 138.0, 134.0, 131.2, 129.1, 127.8, 127.1, 126.8, 112.3, 74.5, 44.9, 40.7, 13.4, -2.6, -2.8.

**FTIR** (neat): 3439, 3046, 2956, 2882, 2798, 1614, 1521, 1345, 1247, 1109, 831, 815, 774, 733, 701 cm<sup>-1</sup>.

**HRMS** (CI) Calcd. for C<sub>21</sub>H<sub>29</sub>NOSi [M+1]<sup>+</sup>: 340.2097, Found: 340.2088.

[α]<sub>D</sub><sup>25</sup> = -20 (c = 1.0, CH<sub>2</sub>Cl<sub>2</sub>).

**HPLC:** (Chiralcel AD-H/AD-H column, hexanes:*i*-PrOH = 99:1, 1 mL/min, 254 nm), t<sub>major</sub> = 46.9 min, t<sub>minor</sub> = 42.5 min; ee = 90%.



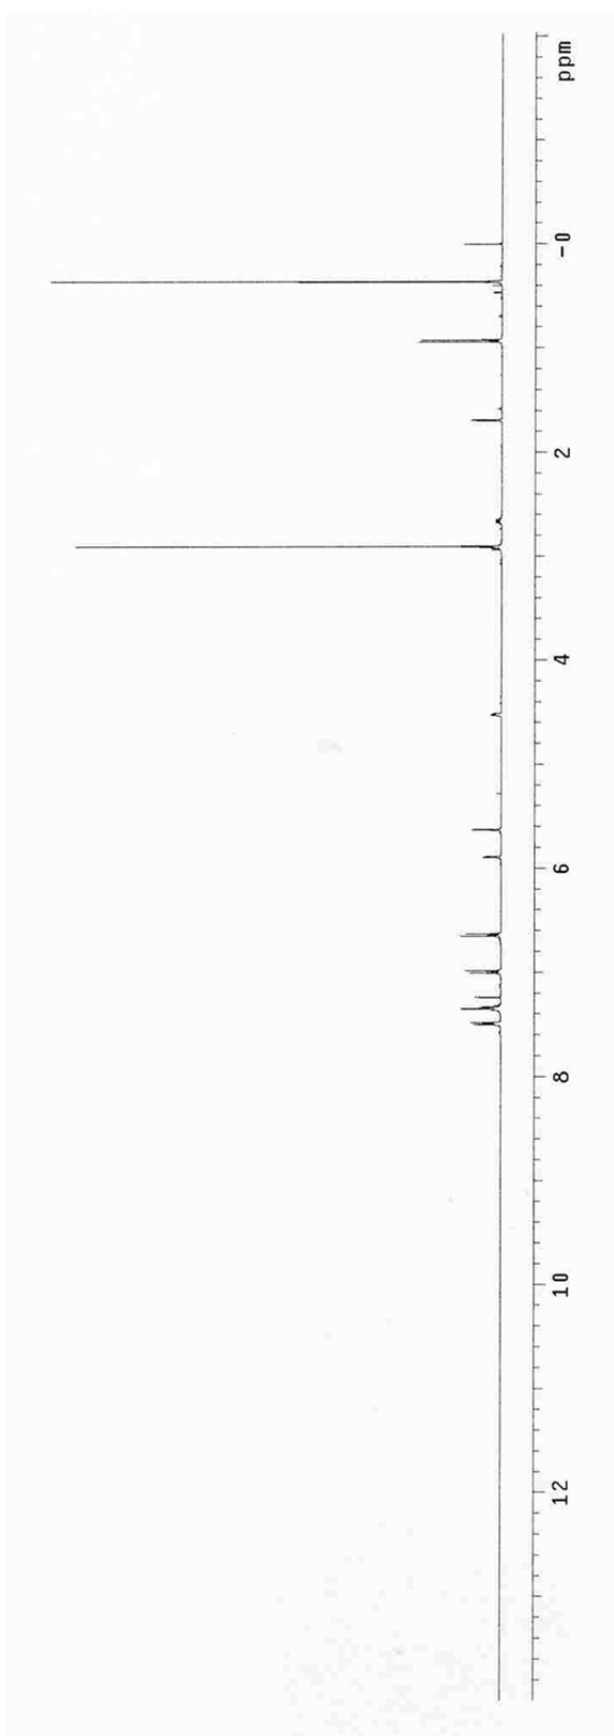

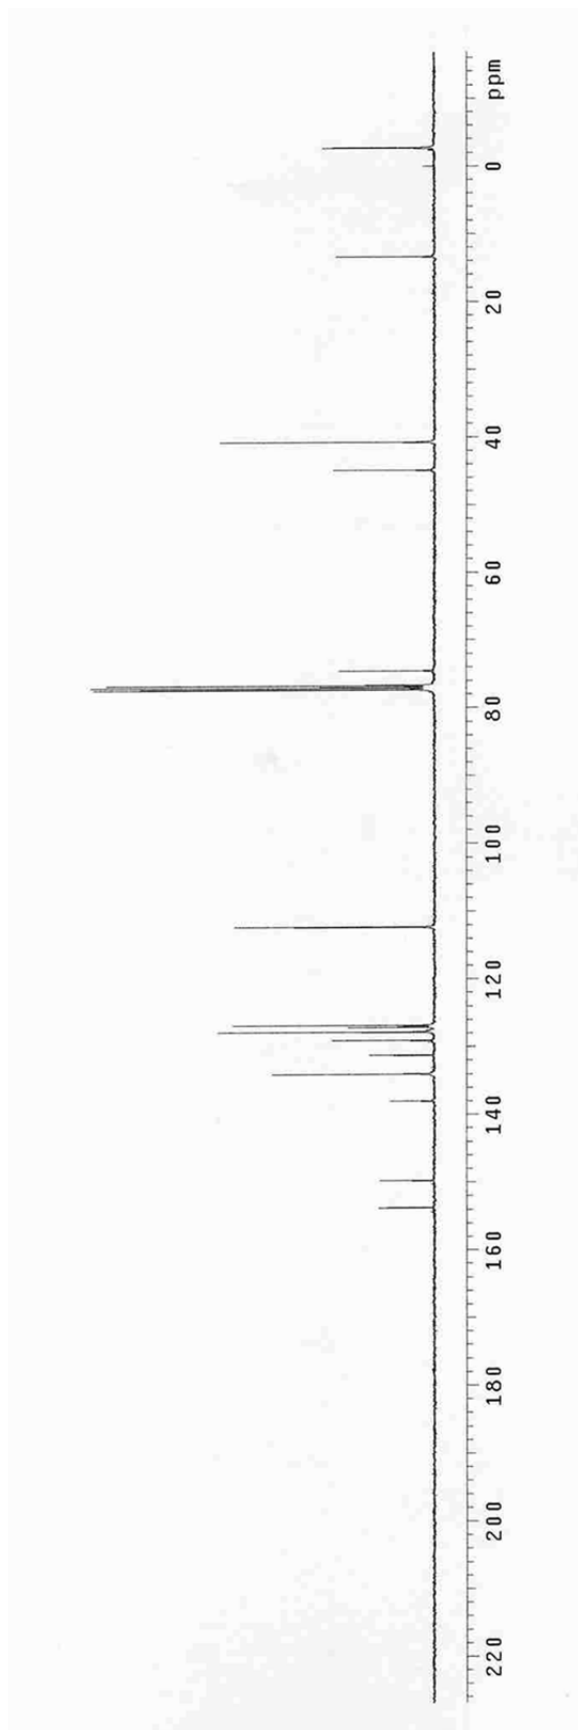

**Racemic:**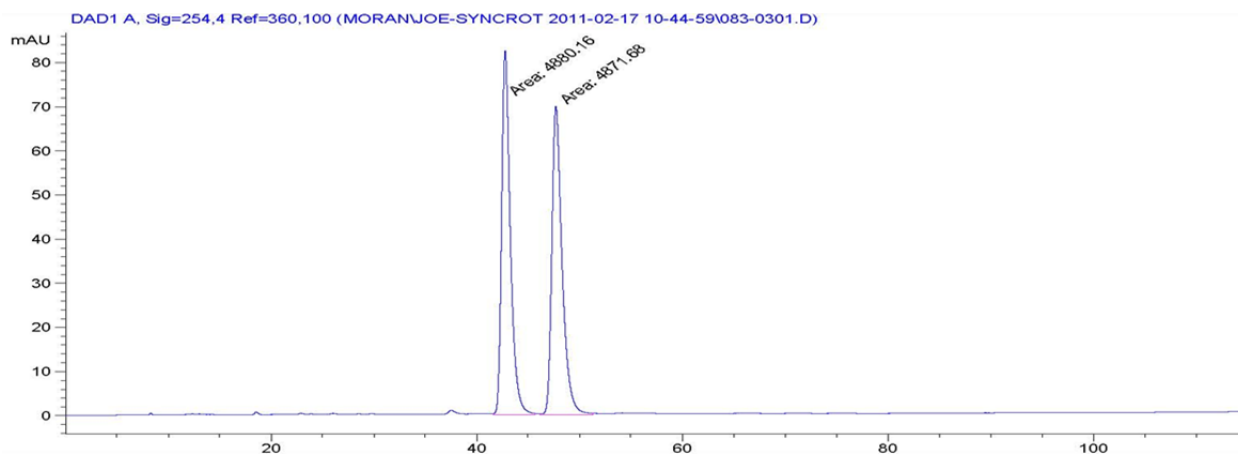

Signal 1: DAD1 A, Sig=254,4 Ref=360,100

| Peak # | RetTime [min] | Type | Width [min] | Area [mAU*s] | Height [mAU] | Area %  |
|--------|---------------|------|-------------|--------------|--------------|---------|
| 1      | 42.730        | MM   | 0.9860      | 4880.16162   | 82.49023     | 50.0435 |
| 2      | 47.667        | MM   | 1.1612      | 4871.68457   | 69.92348     | 49.9565 |

Totals : 9751.84619 152.41371

**(R)-DM-Segphos (from alcohol oxidation level):**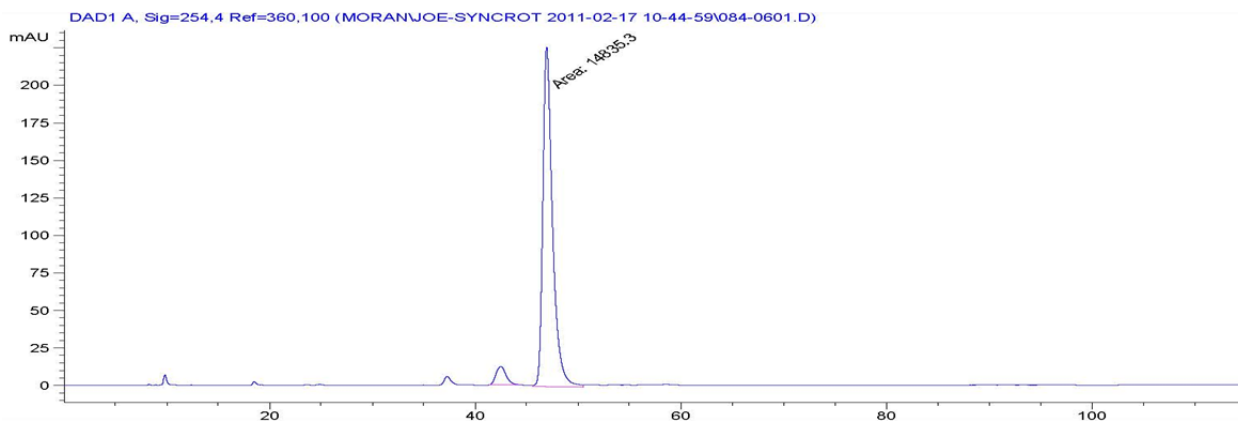

Signal 1: DAD1 A, Sig=254,4 Ref=360,100

| Peak # | RetTime [min] | Type | Width [min] | Area [mAU*s] | Height [mAU] | Area %  |
|--------|---------------|------|-------------|--------------|--------------|---------|
| 1      | 42.451        | BB   | 0.9936      | 824.62164    | 12.21539     | 5.2658  |
| 2      | 46.913        | MM   | 1.0930      | 1.48353e4    | 226.21429    | 94.7342 |

Totals : 1.56599e4 238.42968

## Racemate

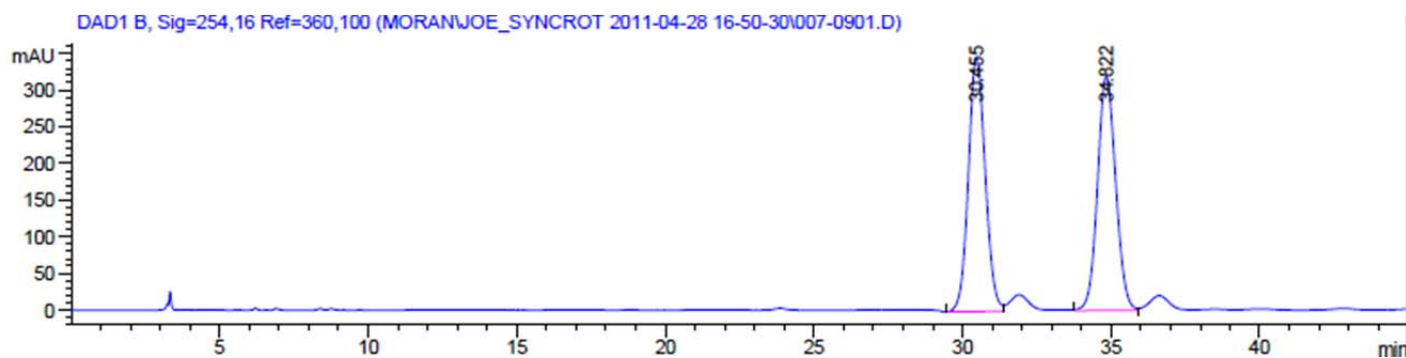

Signal 2: DAD1 B, Sig=254,16 Ref=360,100

| Peak # | RetTime [min] | Type | Width [min] | Area [mAU*s] | Height [mAU] | Area %  |
|--------|---------------|------|-------------|--------------|--------------|---------|
| 1      | 30.455        | BV   | 0.6088      | 1.37060e4    | 347.04153    | 50.2119 |
| 2      | 34.822        | BV   | 0.6581      | 1.35903e4    | 319.57437    | 49.7881 |

Totals : 2.72964e4 666.61591

## (R)-DM-Segphos (from aldehyde oxidation level):

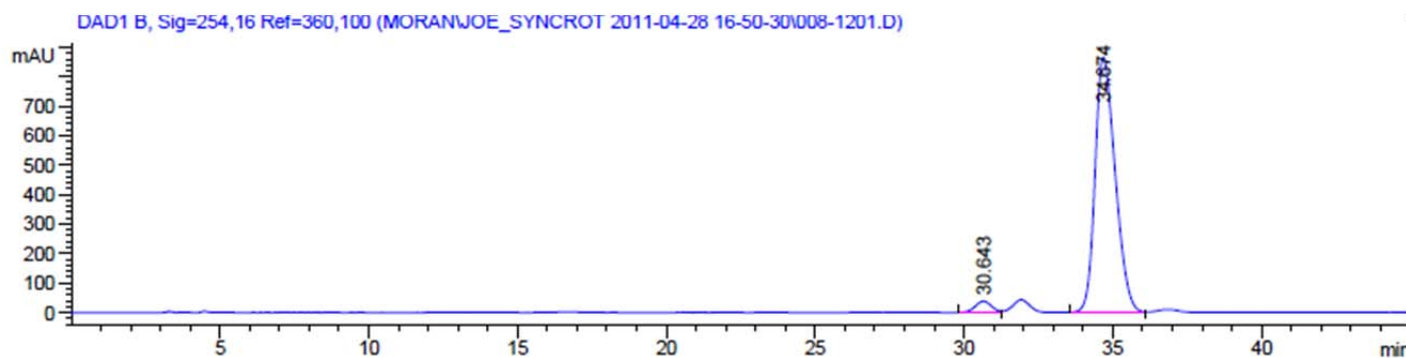

Signal 2: DAD1 B, Sig=254,16 Ref=360,100

| Peak # | RetTime [min] | Type | Width [min] | Area [mAU*s] | Height [mAU] | Area %  |
|--------|---------------|------|-------------|--------------|--------------|---------|
| 1      | 30.643        | BV   | 0.5874      | 1509.72009   | 38.84896     | 3.5734  |
| 2      | 34.674        | BB   | 0.7265      | 4.07393e4    | 866.54004    | 96.4266 |

Totals : 4.22490e4 905.38900

**(1*R*,2*R*)-3-(dimethyl(phenyl)silyl)-1-(2-methoxyphenyl)-2-methylbut-3-en-1-ol (4c)**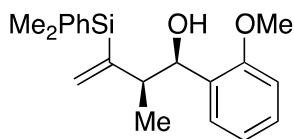

**From Alcohol Oxidation Level:** To a resealable pressure tube (13 x 100 mm) equipped with a magnetic stir bar was added RuHCl(CO)(PPh<sub>3</sub>)<sub>3</sub> (14.3 mg, 0.015 mmol, 5 mol%) and (*R*)-DM-SEGPHOS (10.8 mg, 0.015 mmol, 5 mol%). The tube was sealed with a rubber septum and purged with nitrogen. Toluene (0.15 mL, 2.0 M concentration with respect to alcohol), diene **1** (113 mg, 0.60 mmol, 200 mol%) and alcohol **2c** (41 mg, 0.30 mmol, 100 mol%) were added and the rubber septum was quickly replaced with a screw cap. The mixture was heated at 95 °C (oil bath temperature) for 48 hrs, at which point the reaction mixture was allowed to cool to ambient temperature. The reaction mixture was concentrated *in vacuo* and purified by flash column chromatography (SiO<sub>2</sub>; 0-5% EtOAc/hexanes) to furnish the title compound (82 mg, 0.25 mmol, *syn:anti* = ≥20:1) as a colorless oil in 84% yield.

**From Aldehyde Oxidation Level:** To a resealable pressure tube (13 x 100 mm) equipped with a magnetic stir bar was added RuHCl(CO)(PPh<sub>3</sub>)<sub>3</sub> (14.3 mg, 0.015 mmol, 5 mol%) and (*R*)-DM-SEGPHOS (10.8 mg, 0.015 mmol, 5 mol%). The tube was sealed with a rubber septum and purged with nitrogen. Toluene (0.15 mL, 2.0 M concentration with respect to aldehyde), diene **1** (113 mg, 0.60 mmol, 200 mol%), aldehyde **3c** (41 mg, 0.30 mmol, 100 mol%) and isopropanol (46 μL, 0.60 mmol, 200 mol%) were added and the rubber septum was quickly replaced with a screw cap. The mixture was heated at 95 °C (oil bath temperature) for 48 hrs, at which point the reaction mixture was allowed to cool to ambient temperature. The reaction mixture was concentrated *in vacuo* and purified by flash column chromatography (SiO<sub>2</sub>; 0-5% EtOAc/hexanes) to furnish the title compound (70 mg, 0.21 mmol, *syn:anti* = ≥20:1) as a colorless oil in 71% yield.

**<sup>1</sup>H NMR** (400 MHz, CDCl<sub>3</sub>): δ 7.54–7.51 (m, 2H), 7.37-7.32 (m, 4H), 7.22-7.20 (m, 1H), 6.94 (t, *J* = 7.2 Hz, 1 H), 6.82 (d, *J* = 8.0 Hz, 1H), 5.96 (dd, *J* = 2.4, 1.2, 1H), 5.66 (d, *J* = 2.4, 1H), 4.91 (t, *J* = 4.4, 1H), 3.78 (s, 3H), 3.01-2.94 (m, 1H), 2.19 (d, *J* = 4.4Hz, 1H), 0.94 (d, *J* = 7.2 Hz, 3H), 0.43 (s, 3H), 0.40 (s, 3H).

**<sup>13</sup>C NMR** (100 MHz, CDCl<sub>3</sub>): δ 156.2, 154.1, 138.6, 134.1, 131.1, 129.3, 128.2, 128.0, 127.9, 127.6, 120.5, 110.3, 71.3, 55.1, 42.0, 13.9, -2.5, -2.7.

**HRMS** (CI) Calcd. for C<sub>26</sub>H<sub>26</sub>O<sub>2</sub>Si [M+1]<sup>+</sup>: 327.1780, Found: 327.1773.

[α]<sub>D</sub><sup>25</sup> = -30 (c = 1.0, CH<sub>2</sub>Cl<sub>2</sub>).

**FTIR** (neat): 3565, 3050, 2958, 2835, 1600, 1489, 1463, 1438, 1427, 1286, 1237, 1160, 1108, 1049, 1027, 978, 934, 752, 731, 700 cm<sup>-1</sup>.

**HPLC** (Chiralcel AD-H/AD-H column, hexanes:*i*-PrOH = 99:1, 1 mL/min, 230 nm), *t*<sub>major</sub> = 33.2 min, *t*<sub>minor</sub> = 26.4 min; ee = 90%.

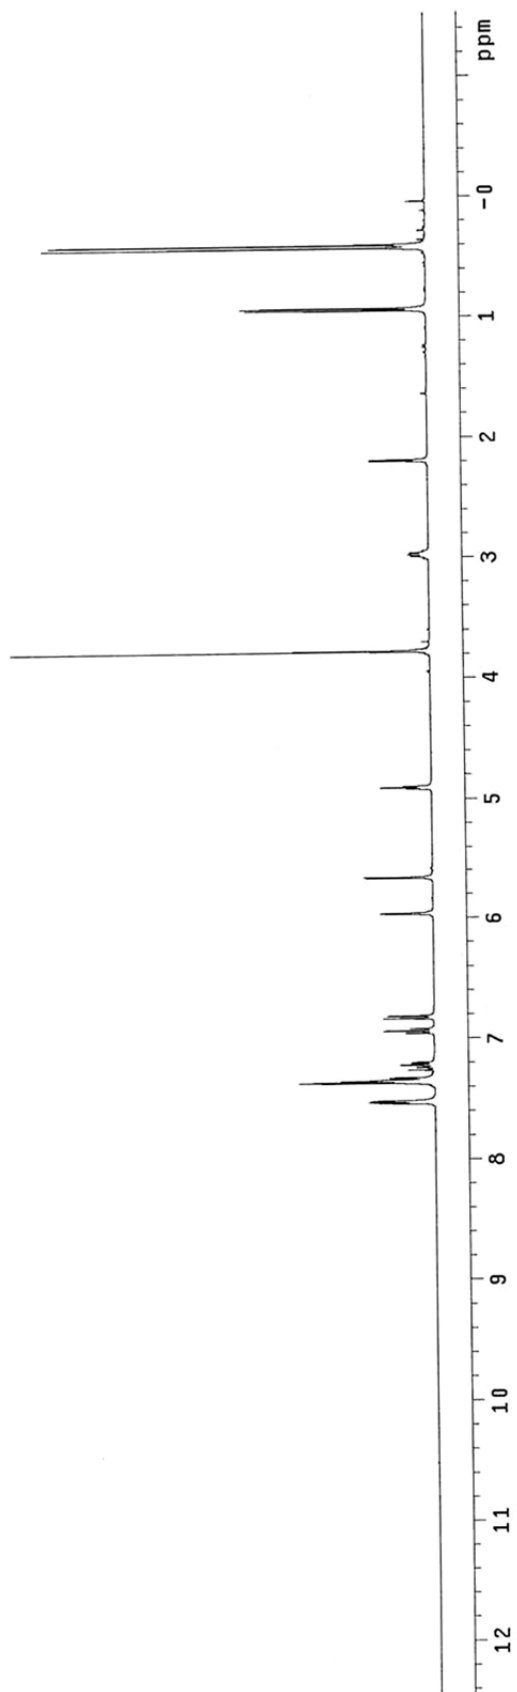

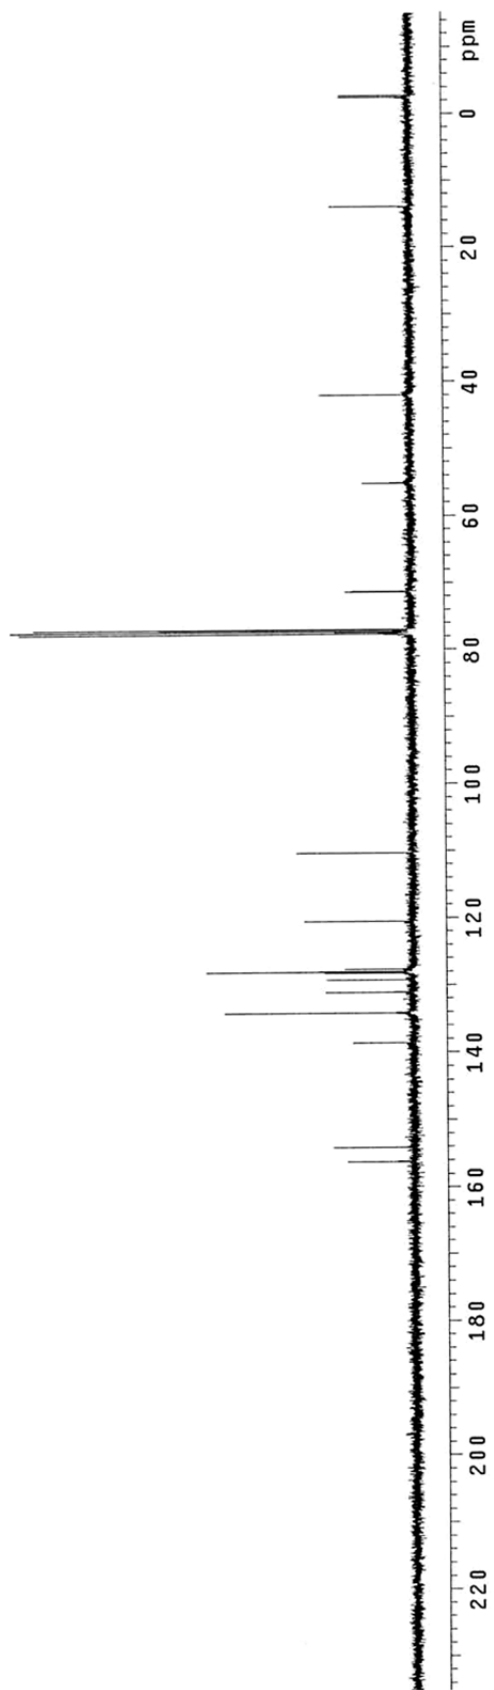

**Racemic:**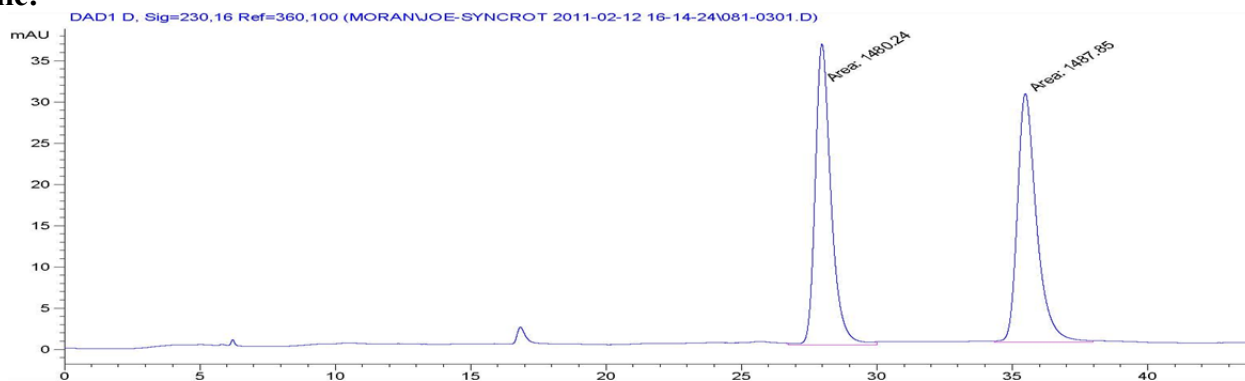

Signal 1: DAD1 D, Sig=230,16 Ref=360,100

| Peak # | RetTime [min] | Type | Width [min] | Area [mAU*s] | Height [mAU] | Area %  |
|--------|---------------|------|-------------|--------------|--------------|---------|
| 1      | 27.963        | MM   | 0.6764      | 1480.23596   | 36.47537     | 49.8717 |
| 2      | 35.472        | MM   | 0.8219      | 1487.85242   | 30.16965     | 50.1283 |

Totals :                              2968.08838      66.64502

**(R)-DM-Segphos (from alcohol oxidation level):**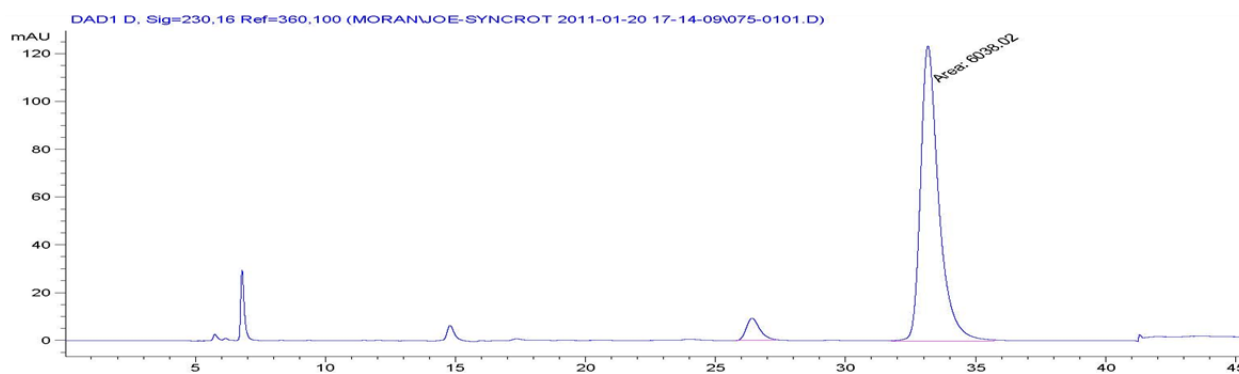

Signal 1: DAD1 D, Sig=230,16 Ref=360,100

| Peak # | RetTime [min] | Type | Width [min] | Area [mAU*s] | Height [mAU] | Area %  |
|--------|---------------|------|-------------|--------------|--------------|---------|
| 1      | 26.387        | BB   | 0.5349      | 329.78067    | 9.22776      | 5.1789  |
| 2      | 33.148        | MM   | 0.8137      | 6038.01514   | 123.66703    | 94.8211 |

Totals :                              6367.79581      132.89479



**(R)-DM-Segphos (from aldehyde oxidation level):**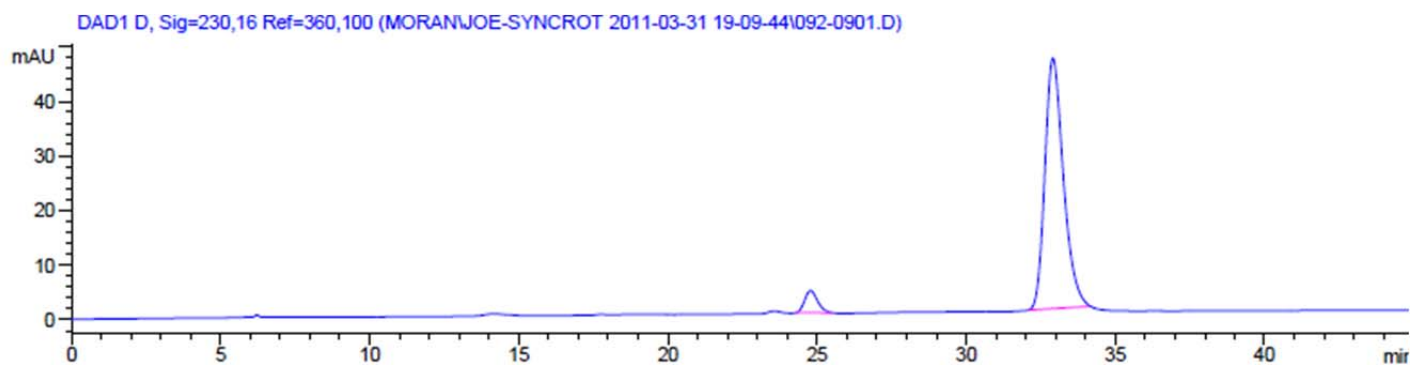

Signal 4: DAD1 D, Sig=230,16 Ref=360,100

| Peak #   | RetTime [min] | Type | Width [min] | Area [mAU*s] | Height [mAU] | Area %  |
|----------|---------------|------|-------------|--------------|--------------|---------|
| 1        | 24.773        | BB   | 0.4526      | 123.21796    | 4.07750      | 5.8366  |
| 2        | 32.898        | BB   | 0.6550      | 1987.91248   | 45.92183     | 94.1634 |
| Totals : |               |      |             | 2111.13043   | 49.99933     |         |

**(1*R*,2*R*)-1-(benzo[*d*][1,3]dioxol-5-yl)-3-(dimethyl(phenyl)silyl)-2-methylbut-3-en-1-ol (4d)**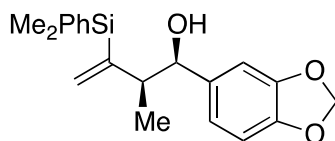

**From Alcohol Oxidation Level:** To a resealable pressure tube (13 x 100 mm) equipped with a magnetic stir bar was added RuHCl(CO)(PPh<sub>3</sub>)<sub>3</sub> (14.3 mg, 0.015 mmol, 5 mol%) and (*R*)- SEGPHOS (9.2 mg, 0.015 mmol, 5 mol%). The tube was sealed with a rubber septum and purged with nitrogen. Toluene (0.15 mL, 2.0 M concentration with respect to alcohol), diene **1** (113 mg, 0.60 mmol, 200 mol%) and alcohol **2d** (46 mg, 0.30 mmol, 100 mol%) were added and the rubber septum was quickly replaced with a screw cap. The mixture was heated at 95 °C (oil bath temperature) for 48 hrs, at which point the reaction mixture was allowed to cool to ambient temperature. The reaction mixture was concentrated *in vacuo* and purified by flash column chromatography (SiO<sub>2</sub>; 0-10% EtOAc/hexanes) to furnish the title compound (87 mg, 0.26 mmol, *syn:anti* = ≥20:1) as a colorless oil in 85% yield.

**From Aldehyde Oxidation Level:** To a resealable pressure tube (13 x 100 mm) equipped with a magnetic stir bar was added RuHCl(CO)(PPh<sub>3</sub>)<sub>3</sub> (14.3 mg, 0.015 mmol, 5 mol%) and (*R*)- SEGPHOS (9.2 mg, 0.015 mmol, 5 mol%). The tube was sealed with a rubber septum and purged with nitrogen. Toluene (0.15 mL, 2.0 M concentration with respect to aldehyde), diene **1** (113 mg, 0.60 mmol, 200 mol%), aldehyde **3d** (45 mg, 0.30 mmol, 100 mol%) and isopropanol (46 μL, 0.60 mmol, 200 mol%) were added and the rubber septum was quickly replaced with a screw cap. The mixture was heated at 95 °C (oil bath temperature) for 48 hrs, at which point the reaction mixture was allowed to cool to ambient temperature. The reaction mixture was concentrated *in vacuo* and purified by flash column chromatography (SiO<sub>2</sub>; 0-10% EtOAc/hexanes) to furnish the title compound (93 mg, 0.27 mmol, *syn:anti* = ≥20:1) as a colorless oil in 91% yield.

**Microwave:**

To a 10 ml microwave vial equipped with a magnetic stir bar was added RuHCl(CO)(PPh<sub>3</sub>)<sub>3</sub> (43 mg, 0.045 mmol, 5 mol%) and (*R*)- SEGPHOS (32 mg, 0.045 mmol, 5 mol%). The tube was sealed with a rubber septum and purged with nitrogen. Toluene (0.45 mL, 2.0 M concentration with respect to alcohol), diene **1** (339 mg, 1.80 mmol, 200 mol%) and alcohol **2d** (138 mg, 0.90 mmol, 100 mol%) were added and the rubber septum was quickly replaced with a microwave cap. The mixture was heated at 95 °C for 4 hrs, at which point the reaction mixture was allowed to cool to ambient temperature. The reaction mixture was concentrated *in vacuo* and purified by flash column chromatography (SiO<sub>2</sub>; 0-10% EtOAc/hexanes) to furnish the title compound (269 mg, 0.79 mmol, *syn:anti* = ≥20:1) as a colorless oil in 88% yield and 93% ee..

**<sup>1</sup>H NMR** (400 MHz, CDCl<sub>3</sub>): δ 7.53-7.51 (m, 2H), 7.40-7.35 (m, 3H), 6.70 (d, *J* = 8.0 Hz, 1 H), 6.62 (d, *J* = 1.3 Hz, 1H), 6.57 (ddd, *J* = 8.0, 1.3, 0.8 Hz, 1H), 5.92 – 5.91 (m, 3H), 5.68 (d, *J* = 2.4, 1H), 4.49 (dd, *J* = 4.4, 2.4 Hz, 1H), 2.67 - 2.61 (m, 1H), 1.81 (d, *J* = 2.4Hz, 1H), 0.92 (d, *J* = 6.8 Hz, 3H), 0.40 (s, 6H).

**<sup>13</sup>C NMR** (100 MHz, CDCl<sub>3</sub>): δ 155.5, 147.2, 146.2, 137.7, 137.1, 133.9, 129.2, 127.9, 127.3, 119.1, 107.7, 106.7, 100.7, 74.3, 44.9, 13.0, -2.7, -2.8.

**FTIR** (neat): 3449, 3048, 2957, 2891, 1502, 1487, 1440, 1421, 1245, 1109, 1039, 984, 932, 814, 774, 732, 700  $\text{cm}^{-1}$ .

**HRMS** (CI) Calcd. for  $\text{C}_{20}\text{H}_{24}\text{O}_3\text{Si}$   $[\text{M}-1]^+$ : 339.1416, Found: 339.1417.

$[\alpha]_{\text{D}}^{25} = -26$  ( $c = 1.0$ ,  $\text{CH}_2\text{Cl}_2$ ).

**HPLC**: (Chiralcel AD-H/AD-H column, hexanes:*i*-PrOH = 99:1, 1 mL/min, 230 nm),  $t_{\text{major}} = 75.5$  min,  $t_{\text{minor}} = 79.5$  min;

**GC**: (The alcohol was treated with TBAF to give the crotylation product for analysis Cyclosil-B: Initial temperature: 50 °C (1 min hold), final temperature: 225 °C; rate: 1.5 C/min)  $t_{\text{major}} = 78.578$  min,  $t_{\text{minor}} = 79.136$  min ee = 93%.

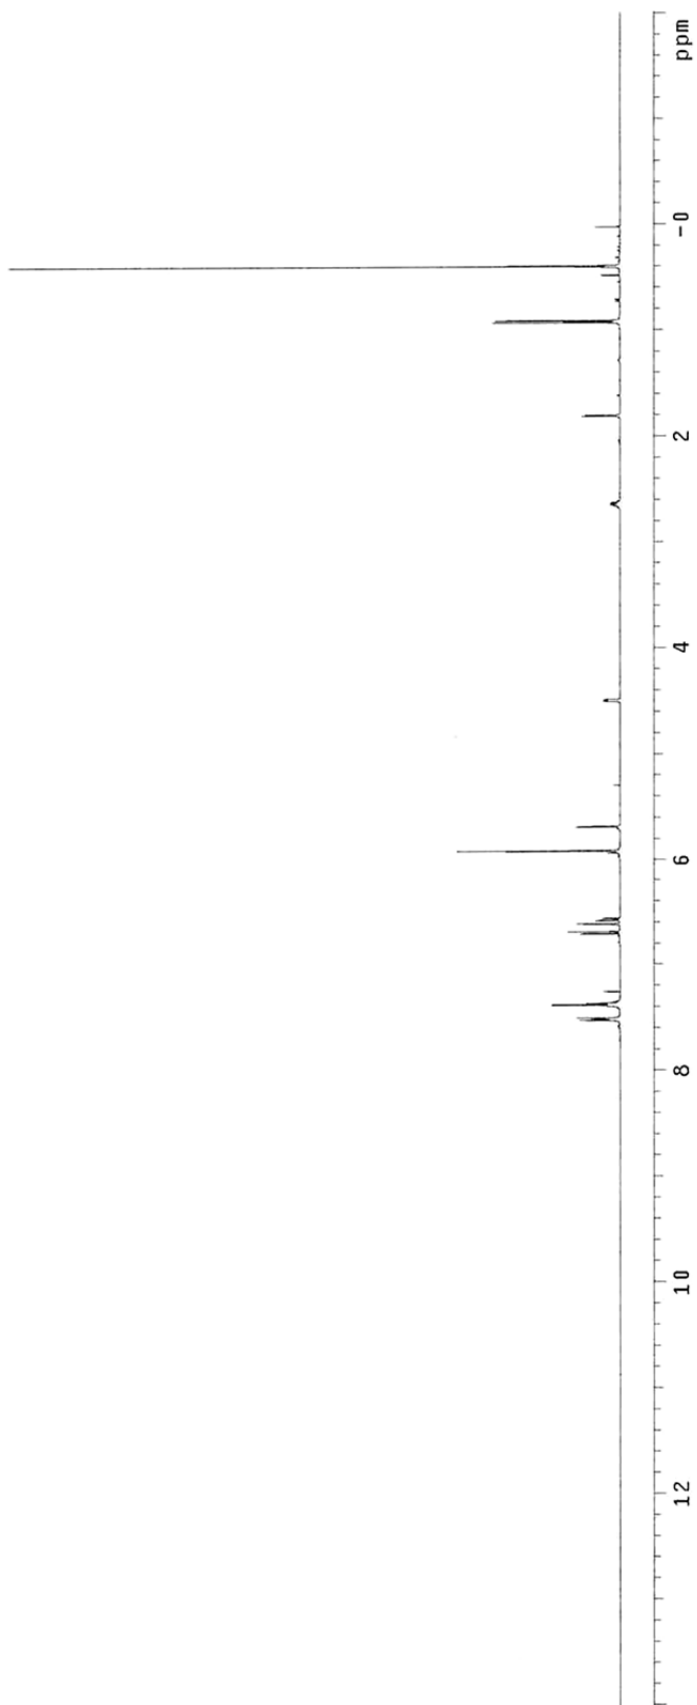

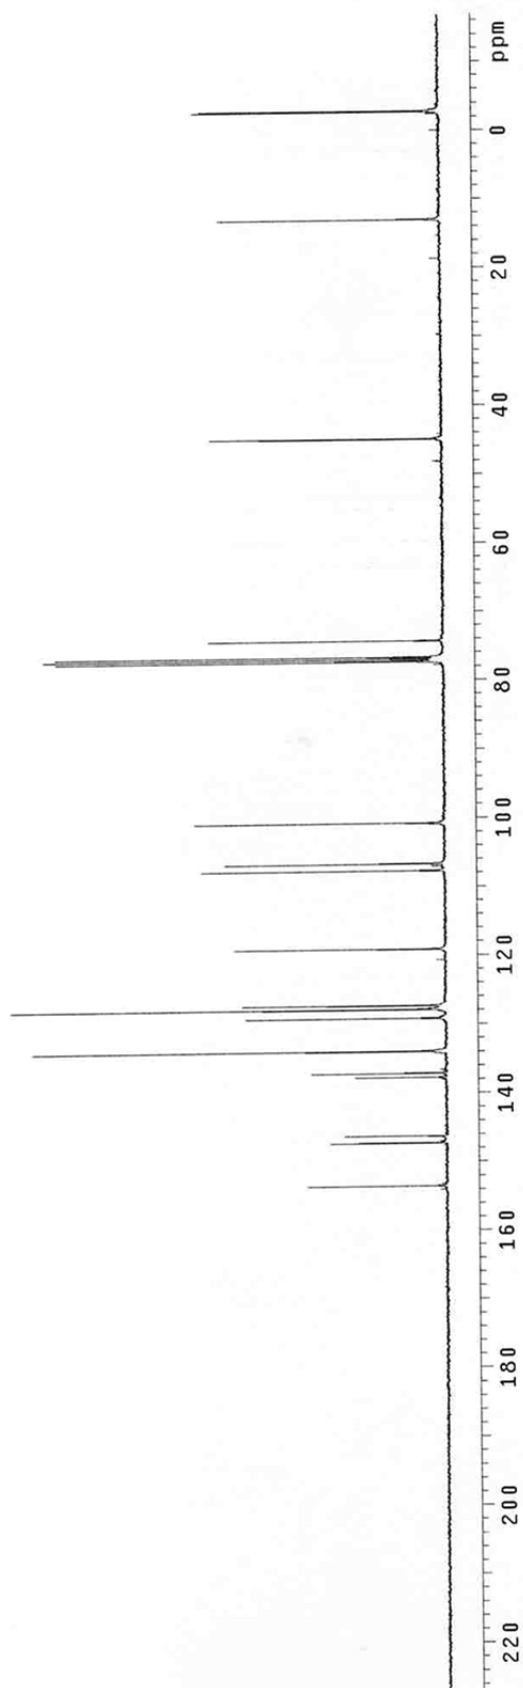

**Racemic (HPLC):**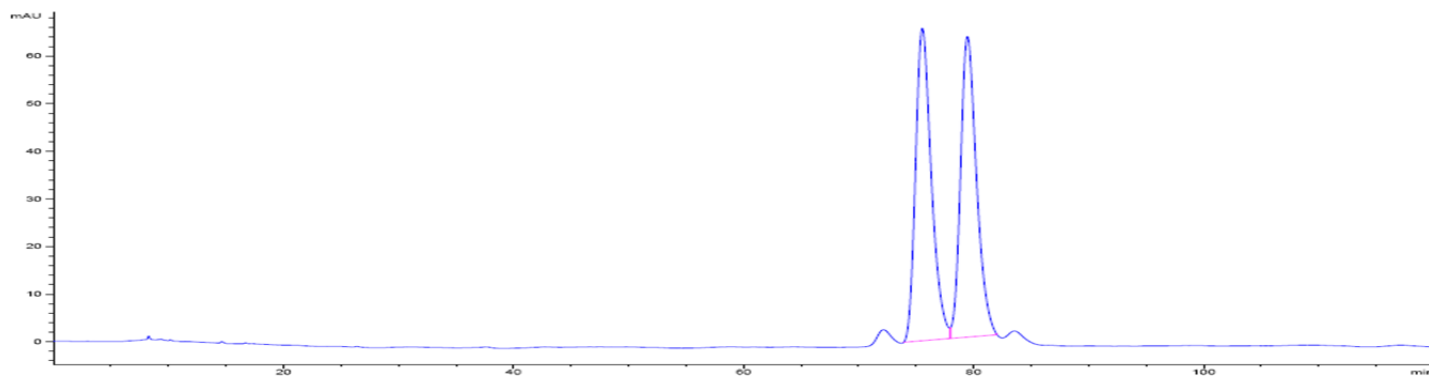

Signal 1: DAD1 D, Sig=230,16 Ref=360,100

| Peak # | RetTime [min] | Type | Width [min] | Area [mAU*s] | Height [mAU] | Area %  |
|--------|---------------|------|-------------|--------------|--------------|---------|
| 1      | 75.526        | BB   | 1.4397      | 6291.15918   | 65.66846     | 50.8017 |
| 2      | 79.449        | BB   | 1.4290      | 6092.60205   | 63.18338     | 49.1983 |

Totals : 1.23838e4 128.85184

**(R)-Segphos (from alcohol oxidation level):**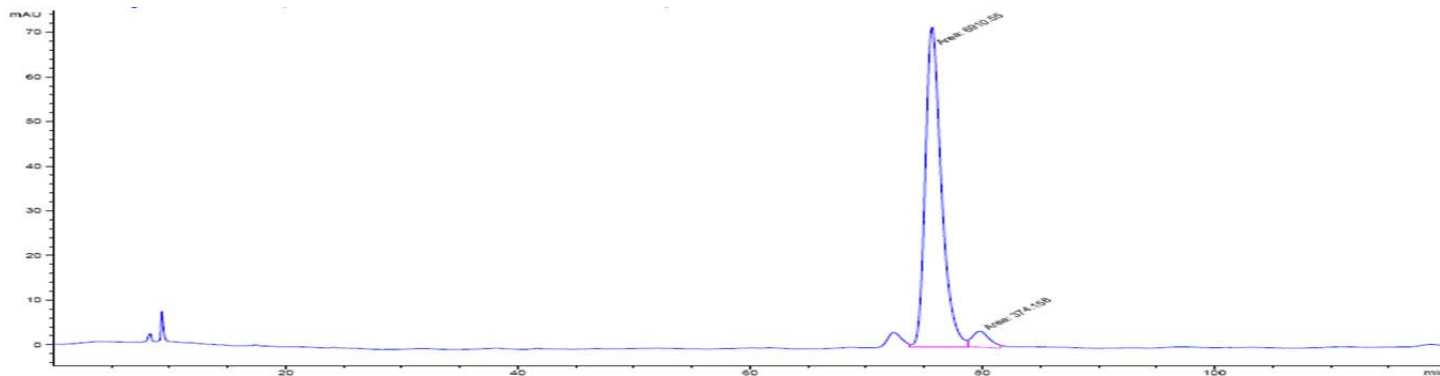

| Peak # | RetTime [min] | Type | Width [min] | Area [mAU*s] | Height [mAU] | Area %  |
|--------|---------------|------|-------------|--------------|--------------|---------|
| 1      | 75.665        | M4   | 1.6095      | 6910.55127   | 71.56133     | 94.8638 |
| 2      | 79.785        | M4   | 1.7348      | 374.15778    | 3.59471      | 5.1362  |

Totals : 7284.70905 75.15605

**Racemic (GC):**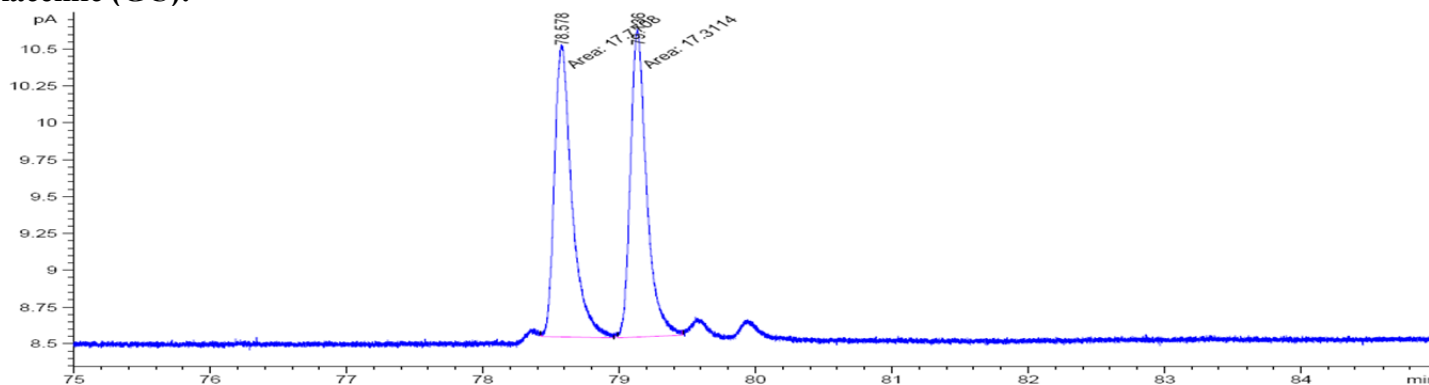

Signal 1: FID1 A, Front Signal

| Peak # | RetTime [min] | Type | Width [min] | Area [pA*s] | Height [pA] | Area %   |
|--------|---------------|------|-------------|-------------|-------------|----------|
| 1      | 78.578        | MM   | 0.1498      | 17.77085    | 1.97775     | 50.65485 |
| 2      | 79.136        | MM   | 0.1384      | 17.31138    | 2.08490     | 49.34515 |

Totals : 35.08222 4.06266

**(R)-DM-Segphos (Microwave from alcohol oxidation level):**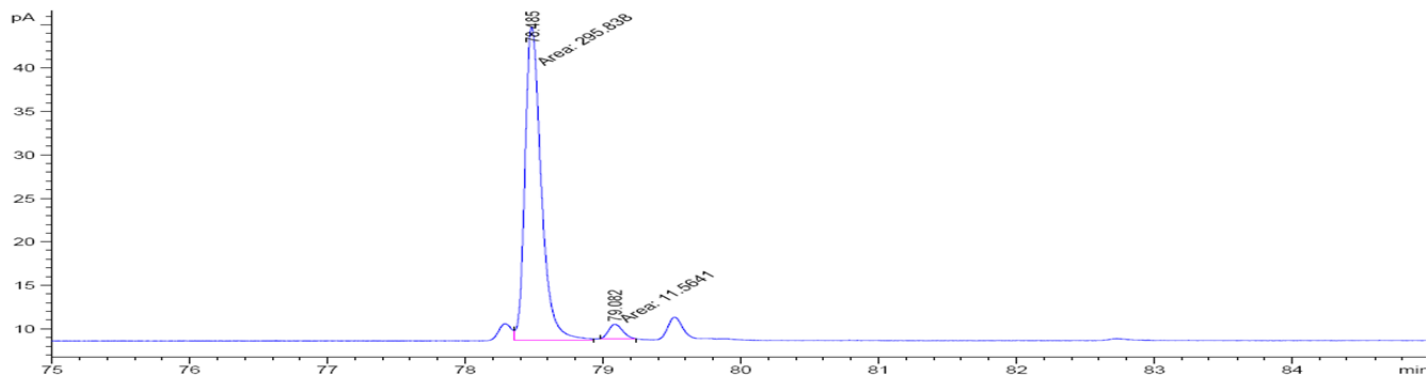

Signal 1: FID1 A, Front Signal

| Peak # | RetTime [min] | Type | Width [min] | Area [pA*s] | Height [pA] | Area %   |
|--------|---------------|------|-------------|-------------|-------------|----------|
| 1      | 78.485        | MM   | 0.1367      | 295.83792   | 36.06434    | 96.23810 |
| 2      | 79.082        | MM   | 0.1164      | 11.56415    | 1.65544     | 3.76190  |

Totals : 307.40207 37.71977

**(R)-Segphos (from aldehyde oxidation level):**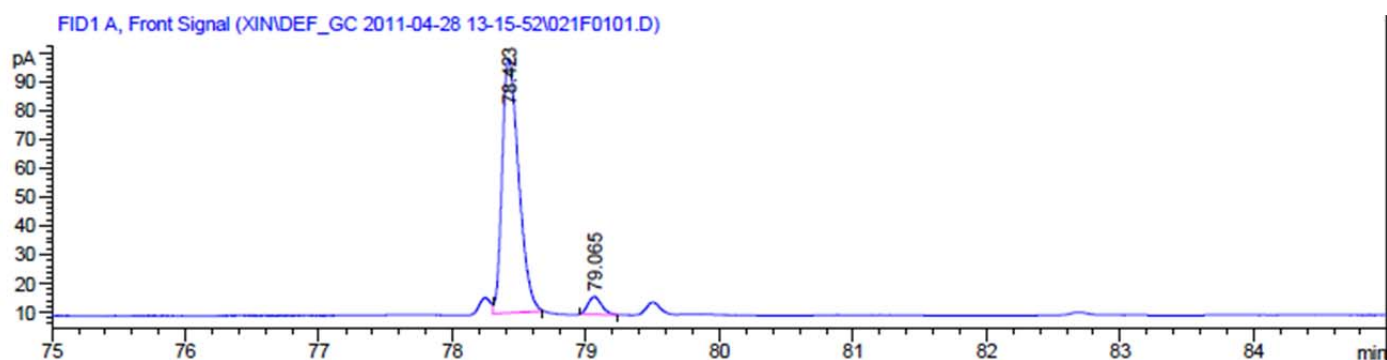

Signal 1: FID1 A, Front Signal

| Peak #   | RetTime [min] | Type | Width [min] | Area [pA*s] | Height [pA] | Area %   |
|----------|---------------|------|-------------|-------------|-------------|----------|
| 1        | 78.423        | VB   | 0.1255      | 760.12622   | 88.06185    | 94.51224 |
| 2        | 79.065        | BB   | 0.1021      | 44.13599    | 6.21072     | 5.48776  |
| Totals : |               |      |             | 804.26221   | 94.27257    |          |



**(3*R*,4*R*,*E*)-5-(dimethyl(phenyl)silyl)-2,4-dimethyl-1-phenylhexa-1,5-dien-3-ol (4e)**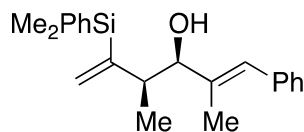

**From Alcohol Oxidation Level:** To a resealable pressure tube (13 x 100 mm) equipped with a magnetic stir bar was added RuHCl(CO)(PPh<sub>3</sub>)<sub>3</sub> (14.3 mg, 0.015 mmol, 5 mol%) and (*R*)-SEGPHOS (9.2 mg, 0.015 mmol, 5 mol%). The tube was sealed with a rubber septum and purged with nitrogen. Toluene (0.15 mL, 2.0 M concentration with respect to alcohol), diene **1** (141 mg, 0.75 mmol, 250 mol%) and alcohol **2e** (44.5 mg, 0.30 mmol, 100 mol%) were added and the rubber septum was quickly replaced with a screw cap. The mixture was heated at 95 °C (oil bath temperature) for 48 hrs, at which point the reaction mixture was allowed to cool to ambient temperature. The reaction mixture was concentrated *in vacuo* and purified by flash column chromatography (SiO<sub>2</sub>; 3% EtOAc/hexanes) to furnish the title compound (70.7 mg, 0.21 mmol, *syn:anti* = 11:1) as a colorless oil in 70% yield.

**From Aldehyde Oxidation Level:** To a resealable pressure tube (13 x 100 mm) equipped with a magnetic stir bar was added RuHCl(CO)(PPh<sub>3</sub>)<sub>3</sub> (14.3 mg, 0.015 mmol, 5 mol%) and (*R*)-SEGPHOS (9.2 mg, 0.015 mmol, 5 mol%). The tube was sealed with a rubber septum and purged with nitrogen. Toluene (0.15 mL, 2.0 M concentration with respect to aldehyde), diene **1** (141 mg, 0.75 mmol, 250 mol%), aldehyde **3e** (43.9 mg, 0.30 mmol, 100 mol%) and isopropanol (46 μL, 0.60 mmol, 200 mol%) were added and the rubber septum was quickly replaced with a screw cap. The mixture was heated at 95 °C (oil bath temperature) for 48 hrs, at which point the reaction mixture was allowed to cool to ambient temperature. The reaction mixture was concentrated *in vacuo* and purified by flash column chromatography (SiO<sub>2</sub>; 3% EtOAc/hexanes) to furnish the title compound (75.9 mg, 0.23 mmol, *syn:anti* = 11:1) as a colorless oil in 75% yield.

**<sup>1</sup>H NMR** (400 MHz, CDCl<sub>3</sub>): δ 7.50-7.48 (m, 2H), 7.33-7.12 (m, 8H), 6.46 (dd, *J* = 1.6, 1.1 Hz, 1H), 5.88 (dd, *J* = 2.2, 1.3 Hz, 1H), 5.65 (dd, *J* = 2.2, 0.3 Hz, 1H), 3.94 (ddd, *J* = 4.0, 2.6, 1.6 Hz, 1H), 2.69 (qdd, *J* = 7.0, 4.0, 1.1 Hz, 1H), 1.64 (d, *J* = 2.6 Hz, 1H), 1.56 (d, *J* = 1.1 Hz, 3H), 0.94 (d, *J* = 7.0 Hz, 3H), 0.40 (s, 6H).

**<sup>13</sup>C NMR** (100 MHz, CDCl<sub>3</sub>): δ 153.6, 138.1, 137.99, 137.96, 134.1, 129.3, 129.1, 128.1, 128.0, 127.6, 126.2, 125.1, 76.4, 41.1, 15.1, 12.8, -2.1, -2.4.

**HRMS** (CI) Calcd. for C<sub>22</sub>H<sub>28</sub>OSi (M<sup>+</sup>): 336.1909, Found: 336.1904.

[α]<sub>D</sub><sup>25</sup> = +39 (c = 1.0, CH<sub>2</sub>Cl<sub>2</sub>).

**FTIR** (neat): 2959, 1738, 1446, 1427, 1372, 1248, 1109, 997, 910, 832, 815, 774, 731, 698 cm<sup>-1</sup>.

**HPLC** (Chiralcel AD-H/AD-H column, hexanes:*i*-PrOH = 99:1, 1.0 mL/min, 254 nm), *t*<sub>major</sub> = 31.6 min, *t*<sub>minor</sub> = 26.8 min; ee = 90

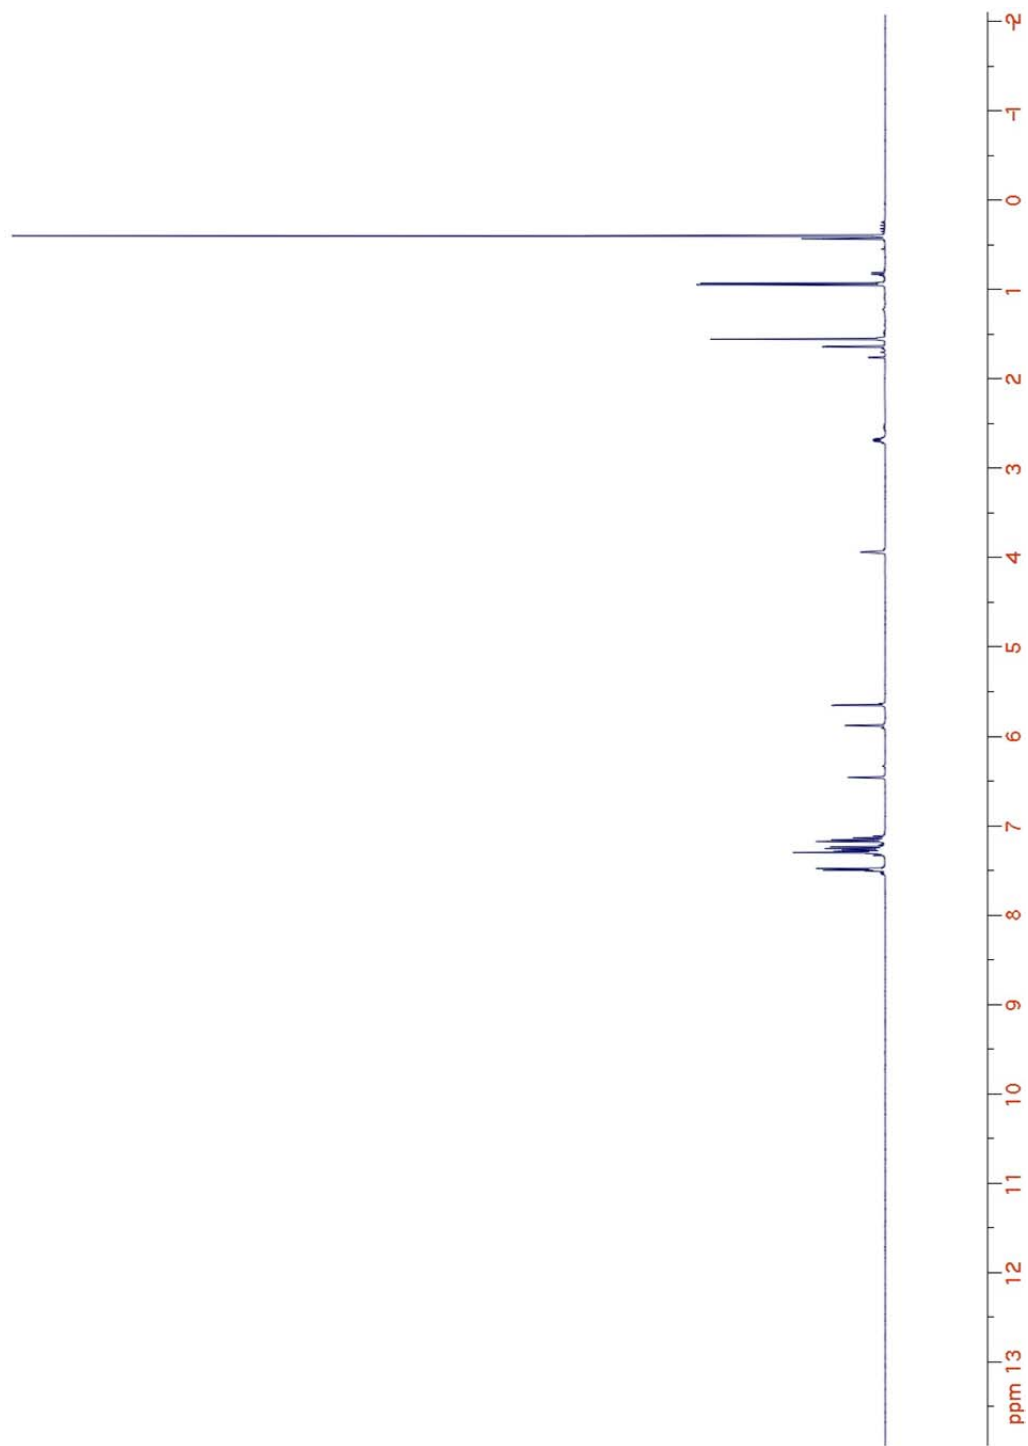

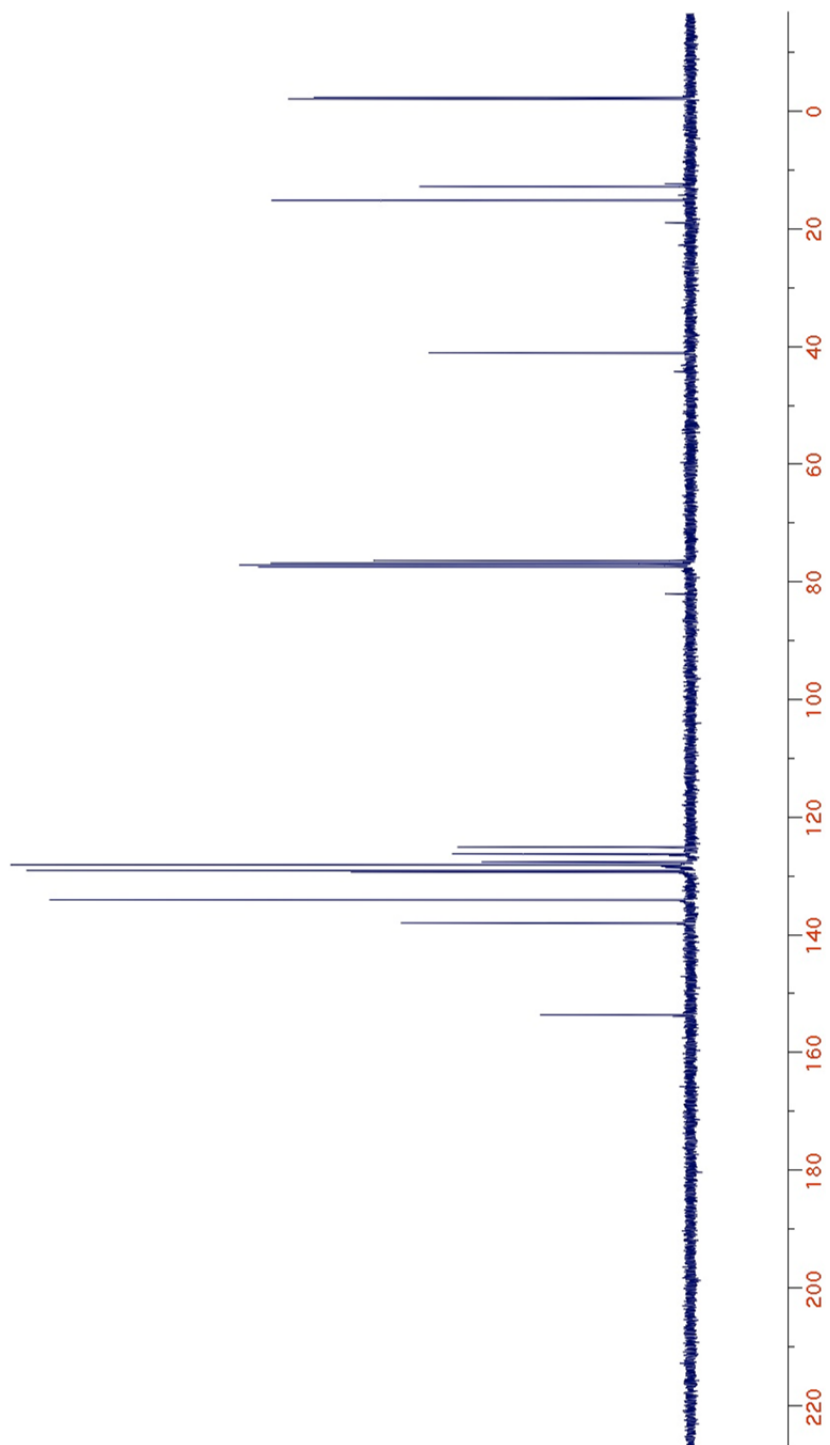

**Racemate:**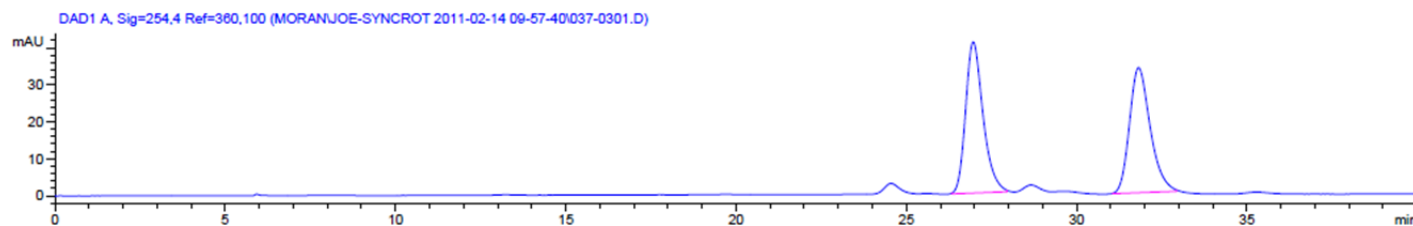

Signal 1: DAD1 A, Sig=254,4 Ref=360,100

| Peak # | RetTime [min] | Type | Width [min] | Area [mAU*s] | Height [mAU] | Area %  |
|--------|---------------|------|-------------|--------------|--------------|---------|
| 1      | 26.964        | BB   | 0.5381      | 1459.54590   | 40.92148     | 50.3969 |
| 2      | 31.820        | BB   | 0.6429      | 1436.55566   | 33.86212     | 49.6031 |

Totals : 2896.10156 74.78360

**(R)-SEGPPOS (from alcohol oxidation level):**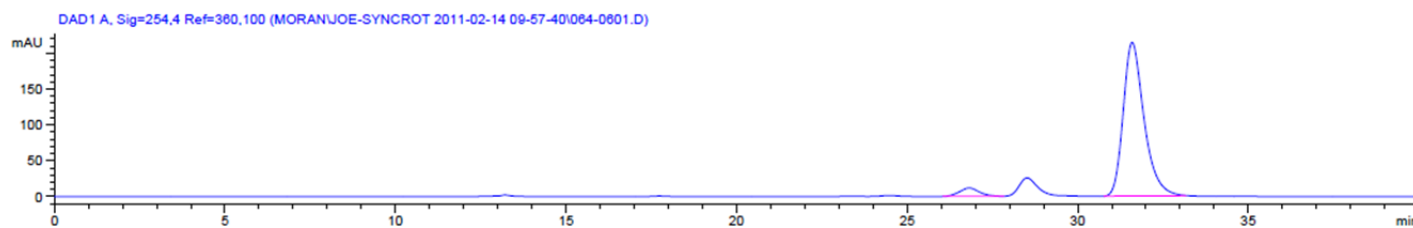

Signal 1: DAD1 A, Sig=254,4 Ref=360,100

| Peak # | RetTime [min] | Type | Width [min] | Area [mAU*s] | Height [mAU] | Area %  |
|--------|---------------|------|-------------|--------------|--------------|---------|
| 1      | 26.815        | BB   | 0.5965      | 467.62494    | 11.59643     | 4.8742  |
| 2      | 31.593        | BB   | 0.6401      | 9126.27930   | 214.61650    | 95.1258 |

Totals : 9593.90424 226.21293

**(R)-SEGPPOS (from aldehyde oxidation level):**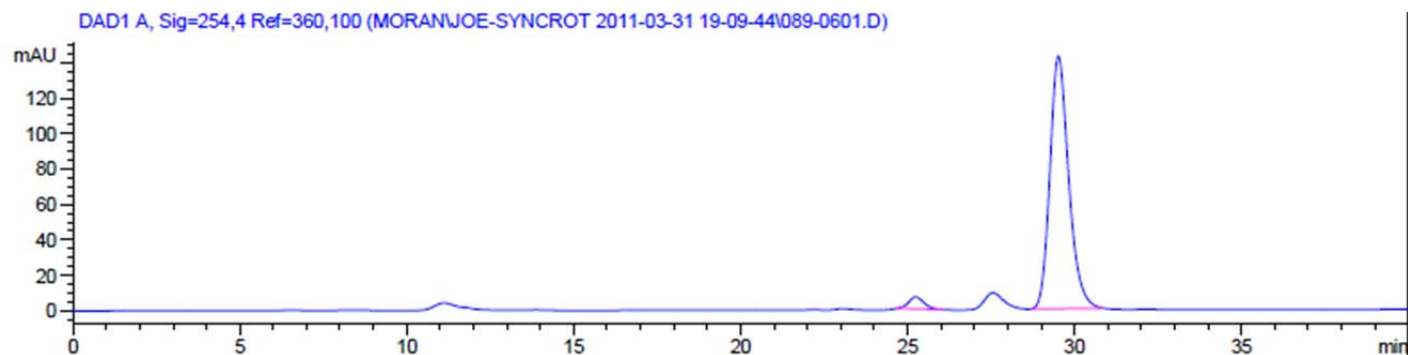

Signal 1: DAD1 A, Sig=254,4 Ref=360,100

| Peak # | RetTime [min] | Type | Width [min] | Area [mAU*s] | Height [mAU] | Area %  |
|--------|---------------|------|-------------|--------------|--------------|---------|
| 1      | 25.236        | BB   | 0.4840      | 220.40227    | 6.83803      | 3.7834  |
| 2      | 29.506        | BB   | 0.5933      | 5605.09668   | 142.98344    | 96.2166 |

Totals : 5825.49895 149.82148

**(3*R*,4*S*)-2-(dimethyl(phenyl)silyl)-3,6-dimethylhepta-1,5-dien-4-ol (4f)**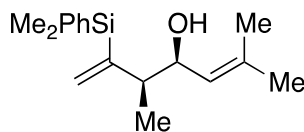

**From Alcohol Oxidation Level:** To a resealable pressure tube (13 x 100 mm) equipped with a magnetic stir bar was added RuHCl(CO)(PPh<sub>3</sub>)<sub>3</sub> (14.3 mg, 0.015 mmol, 5 mol%) and (*R*)-DM-SEGPHOS (10.8 mg, 0.015 mmol, 5 mol%). The tube was sealed with a rubber septum and purged with nitrogen. THF (0.15 mL, 2.0 M concentration with respect to alcohol), diene **1** (141 mg, 0.75 mmol, 250 mol%) and alcohol **2f** (25.8 mg, 0.30 mmol, 100 mol%) were added and the rubber septum was quickly replaced with a screw cap. The mixture was heated at 95 °C (oil bath temperature) for 48 hrs, at which point the reaction mixture was allowed to cool to ambient temperature. The reaction mixture was concentrated *in vacuo* and purified by flash column chromatography (SiO<sub>2</sub>; 3% EtOAc/hexanes) to furnish the title compound (55.2 mg, 0.20 mmol, *syn:anti* = ≥20:1) as a colorless oil in 67% yield.

**From Aldehyde Oxidation Level:** To a resealable pressure tube (13 x 100 mm) equipped with a magnetic stir bar was added RuHCl(CO)(PPh<sub>3</sub>)<sub>3</sub> (14.3 mg, 0.015 mmol, 5 mol%) and (*R*)-DM-SEGPHOS (10.8 mg, 0.015 mmol, 5 mol%). The tube was sealed with a rubber septum and purged with nitrogen. THF (0.15 mL, 2.0 M concentration with respect to aldehyde), diene **1** (141 mg, 0.75 mmol, 250 mol%), aldehyde **3f** (25.2 mg, 0.30 mmol, 100 mol%) and isopropanol (46 μL, 0.60 mmol, 200 mol%) were added and the rubber septum was quickly replaced with a screw cap. The mixture was heated at 95 °C (oil bath temperature) for 48 hrs, at which point the reaction mixture was allowed to cool to ambient temperature. The reaction mixture was concentrated *in vacuo* and purified by flash column chromatography (SiO<sub>2</sub>; 3% EtOAc/hexanes) to furnish the title compound (46.0 mg, 0.17 mmol, *syn:anti* = ≥20:1) as a colorless oil in 56% yield.

**<sup>1</sup>H NMR** (400 MHz, CDCl<sub>3</sub>): δ 7.53–7.50 (m, 2H), 7.37–7.34 (m, 3H), 5.83 (dd, *J* = 2.3, 1.0 Hz, 1H), 5.61 (d, *J* = 2.3 Hz, 1H), 5.05 (dq, *J* = 8.7, 1.4, 1.2 Hz, 1H), 4.18 (dd, *J* = 8.7, 5.5 Hz, 1H), 2.43 (qdd, *J* = 6.9, 5.5, 1.0 Hz, 1H), 1.65 (d, *J* = 1.4 Hz, 3H), 1.51 (d, *J* = 1.2 Hz, 3H), 1.38 (s, 1H), 1.06 (d, *J* = 6.9 Hz, 3H), 0.404 (s, 3H), 0.402 (s, 3H).

**<sup>13</sup>C NMR** (100 MHz, CDCl<sub>3</sub>):

δ 153.6, 138.2, 134.7, 134.1, 129.2, 128.0, 127.2, 126.8, 70.5, 43.6, 26.0, 18.5, 15.2, -2.6, -2.4.

**HRMS** (CI) Calcd. for C<sub>17</sub>H<sub>26</sub>OSi (M<sup>+</sup>): 274.1753, Found: 274.1752.

[α]<sub>D</sub><sup>25</sup> = -12 (c = 1.0, CH<sub>2</sub>Cl<sub>2</sub>).

**FTIR** (neat): 2960, 1427, 1375, 1247, 1108, 997, 926, 831, 816, 731, 699 cm<sup>-1</sup>.

**HPLC** (Chiralcel AD-H/AD-H column, hexanes:*i*-PrOH = 99:1, 1.0 mL/min, 210 nm), *t*<sub>major</sub> = 17.7 min, *t*<sub>minor</sub> = 19.1 min; ee = 90%.

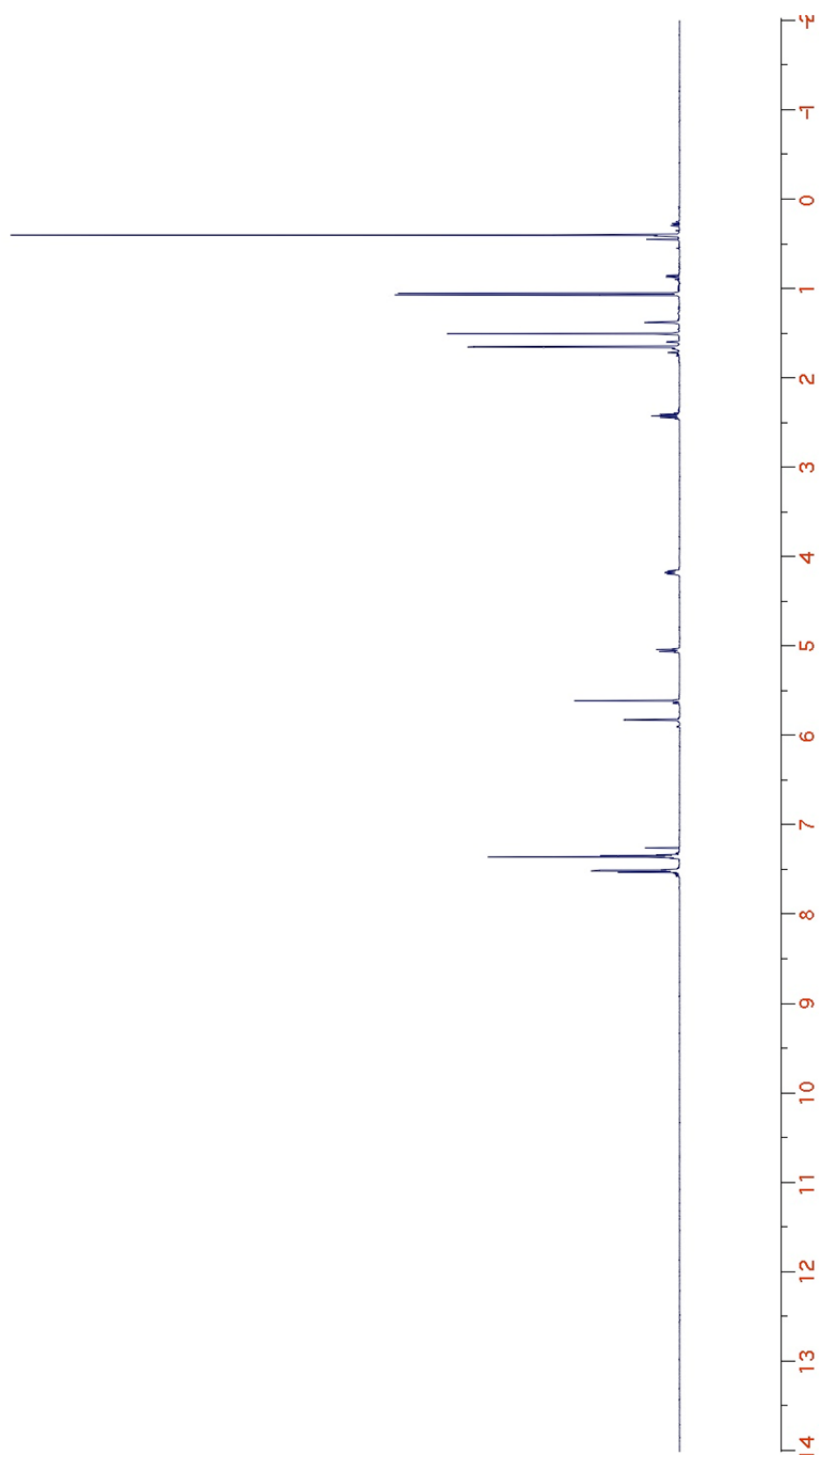

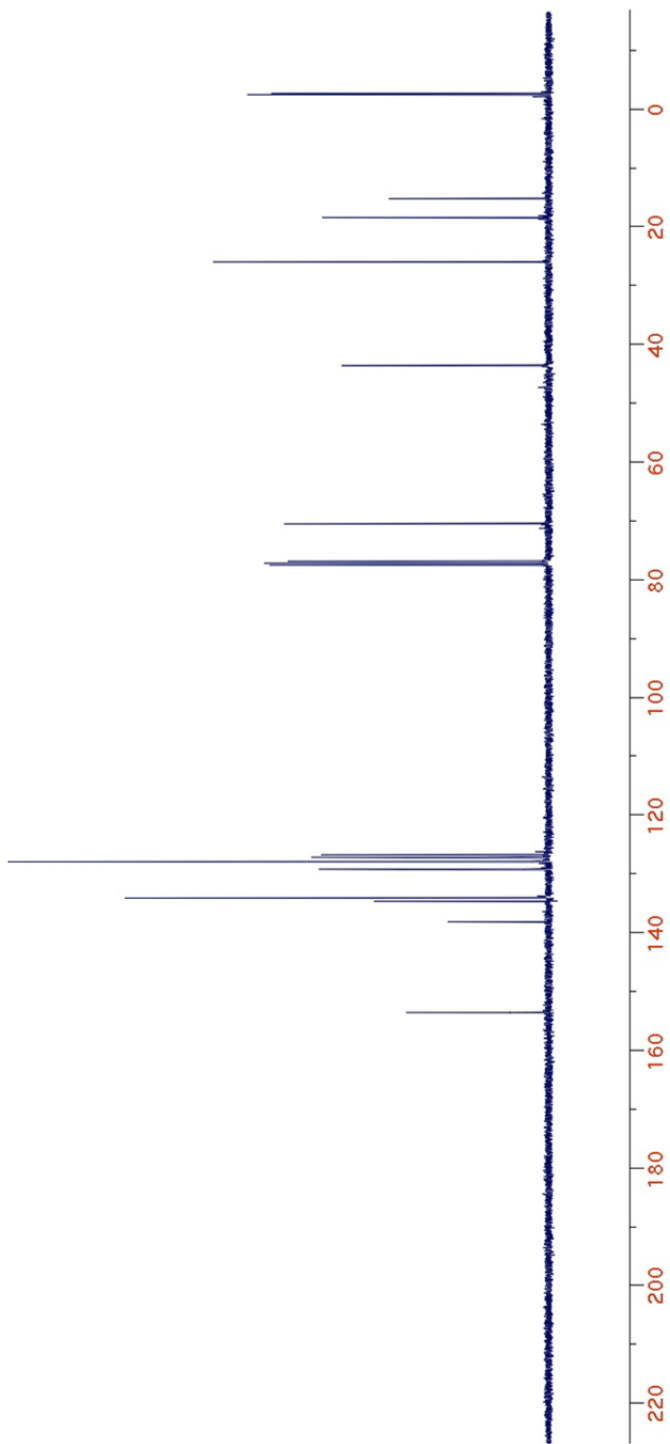



**Racemate:**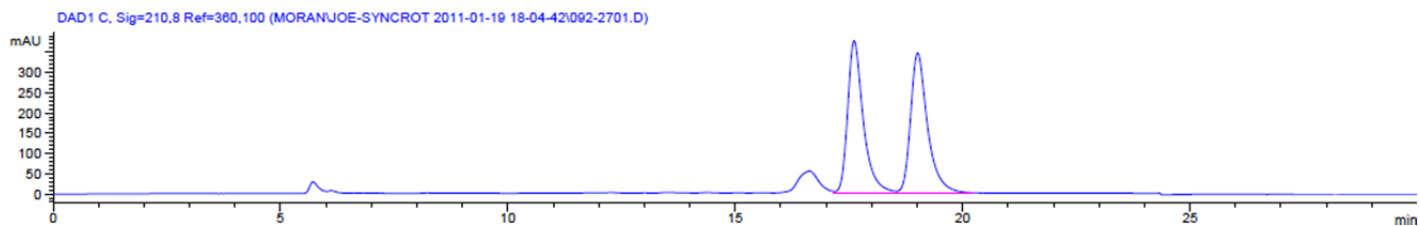

Signal 3: DAD1 C, Sig=210,8 Ref=360,100

| Peak # | RetTime [min] | Type | Width [min] | Area [mAU*s] | Height [mAU] | Area %  |
|--------|---------------|------|-------------|--------------|--------------|---------|
| 1      | 17.610        | VV   | 0.3572      | 8997.88184   | 375.93353    | 49.9955 |
| 2      | 19.005        | VB   | 0.3874      | 8999.51074   | 346.06354    | 50.0045 |

Totals : 1.79974e4 721.99707

**(R)-DM-SEGPHOS (from alcohol oxidation level):**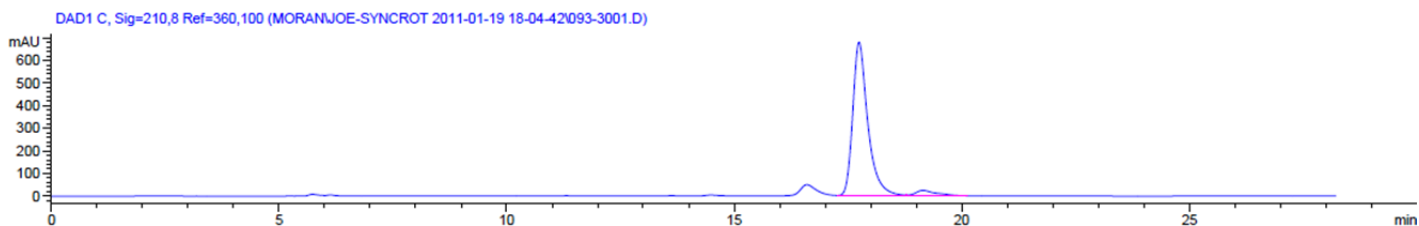

Signal 3: DAD1 C, Sig=210,8 Ref=360,100

| Peak # | RetTime [min] | Type | Width [min] | Area [mAU*s] | Height [mAU] | Area %  |
|--------|---------------|------|-------------|--------------|--------------|---------|
| 1      | 17.739        | VV   | 0.3411      | 1.57060e4    | 680.85144    | 95.1293 |
| 2      | 19.146        | VB   | 0.4569      | 804.15765    | 24.63239     | 4.8707  |

Totals : 1.65102e4 705.48383

## Racemate

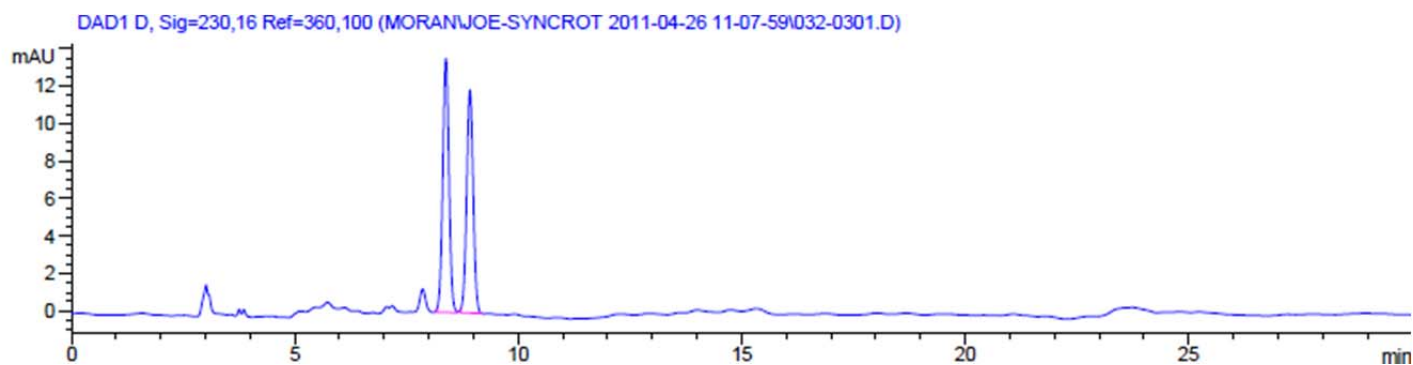

Signal 4: DAD1 D, Sig=230,16 Ref=360,100

| Peak # | RetTime [min] | Type | Width [min] | Area [mAU*s] | Height [mAU] | Area %  |
|--------|---------------|------|-------------|--------------|--------------|---------|
| 1      | 8.375         | BB   | 0.1512      | 131.79037    | 13.58567     | 52.1620 |
| 2      | 8.912         | BB   | 0.1583      | 120.86557    | 11.92097     | 47.8380 |

Totals : 252.65594 25.50664

## (R)-DM-SEGPPOS (from aldehyde oxidation level):

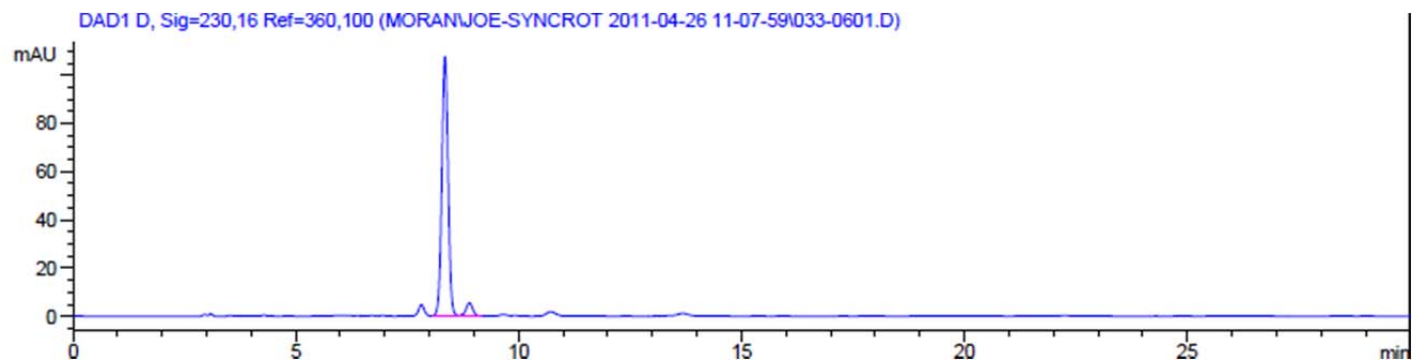

Signal 4: DAD1 D, Sig=230,16 Ref=360,100

| Peak # | RetTime [min] | Type | Width [min] | Area [mAU*s] | Height [mAU] | Area %  |
|--------|---------------|------|-------------|--------------|--------------|---------|
| 1      | 8.339         | BB   | 0.1516      | 1049.18921   | 107.78114    | 94.9326 |
| 2      | 8.887         | BB   | 0.1571      | 56.00493     | 5.48624      | 5.0674  |

Totals : 1105.19414 113.26737

**(3*R*,4*S*,*E*)-2-(dimethyl(phenyl)silyl)-3,6,10-trimethylundeca-1,5,9-trien-4-ol (4g)**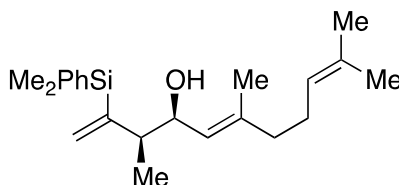

**From Alcohol Oxidation Level:** To a resealable pressure tube (13 x 100 mm) equipped with a magnetic stir bar was added RuHCl(CO)(PPh<sub>3</sub>)<sub>3</sub> (14.3 mg, 0.015 mmol, 5 mol%) and (*R*)-DM-SEGPHOS (10.8 mg, 0.015 mmol, 5 mol%). The tube was sealed with a rubber septum and purged with nitrogen. Toluene (0.15 mL, 2.0 M concentration with respect to alcohol), diene **1** (141 mg, 0.75 mmol, 250 mol%) and alcohol **2g** (46.3 mg, 0.30 mmol, 100 mol%) were added and the rubber septum was quickly replaced with a screw cap. The mixture was heated at 95 °C (oil bath temperature) for 48 hrs, at which point the reaction mixture was allowed to cool to ambient temperature. The reaction mixture was concentrated *in vacuo* and purified by flash column chromatography (SiO<sub>2</sub>; 3% EtOAc/hexanes) to furnish the title compound (71.8 mg, 0.21 mmol, *syn:anti* = ≥20:1) as a colorless oil in 70% yield.

**From Aldehyde Oxidation Level:** To a resealable pressure tube (13 x 100 mm) equipped with a magnetic stir bar was added RuHCl(CO)(PPh<sub>3</sub>)<sub>3</sub> (14.3 mg, 0.015 mmol, 5 mol%) and (*R*)-DM-SEGPHOS (10.8 mg, 0.015 mmol, 5 mol%). The tube was sealed with a rubber septum and purged with nitrogen. Toluene (0.15 mL, 2.0 M concentration with respect to aldehyde), diene **1** (141 mg, 0.75 mmol, 250 mol%), aldehyde **3g** (45.3 mg, 0.30 mmol, 100 mol%) and isopropanol (46 μL, 0.60 mmol, 200 mol%) were added and the rubber septum was quickly replaced with a screw cap. The mixture was heated at 95 °C (oil bath temperature) for 48 hrs, at which point the reaction mixture was allowed to cool to ambient temperature. The reaction mixture was concentrated *in vacuo* and purified by flash column chromatography (SiO<sub>2</sub>; 3% EtOAc/hexanes) to furnish the title compound (72.9 mg, 0.21 mmol, *syn:anti* = ≥20:1) as a colorless oil in 71% yield.

**<sup>1</sup>H NMR** (400 MHz, CDCl<sub>3</sub>): δ 7.53-7.51 (m, 2H), 7.36-7.33 (m, 3H), 5.83 (dd, *J* = 2.3, 1.1 Hz, 1H), 5.62 (d, *J* = 2.3 Hz, 1H), 5.11-5.04 (m, 2H), 4.20 (dd, *J* = 8.5, 5.2 Hz, 1H), 2.44 (qdd, *J* = 6.9, 5.2, 1.1 Hz, 1H), 2.08-2.03 (m, 2H), 1.97-1.93 (m, 2H), 1.68 (d, *J* = 1.1 Hz, 3H), 1.59 (d, *J* = 0.7 Hz, 3H), 1.49 (d, *J* = 1.3 Hz, 3H), 1.34 (s, 1H), 1.05 (d, *J* = 6.9 Hz, 3H), 0.409 (s, 3H), 0.407 (s, 3H).

**<sup>13</sup>C NMR** (100 MHz, CDCl<sub>3</sub>): δ 153.5, 138.1, 138.0, 134.1, 131.7, 129.2, 127.9, 127.3, 126.5, 124.2, 70.2, 43.7, 39.8, 26.5, 25.8, 17.8, 16.8, 14.8, -2.4, -2.7.

**HRMS** (CI) Calcd. for C<sub>22</sub>H<sub>34</sub>Osi (M<sup>+</sup>): 342.2379, Found: 342.2375.

[α]<sub>D</sub><sup>25</sup> = -4 (c = 1.0, CH<sub>2</sub>Cl<sub>2</sub>).

**FTIR** (neat): 2963, 1427, 1247, 1109, 969, 926, 831, 816, 773, 731, 700 cm<sup>-1</sup>.

**HPLC** (The alcohol was converted to the 4-nitrobenzoate for analysis; Chiralcel AD-H/AD-H column, hexanes:*i*-PrOH = 99:1, 1.0 mL/min, 254 nm), *t*<sub>major</sub> = 10.1 min, *t*<sub>minor</sub> = 11.8 min; ee = 92%

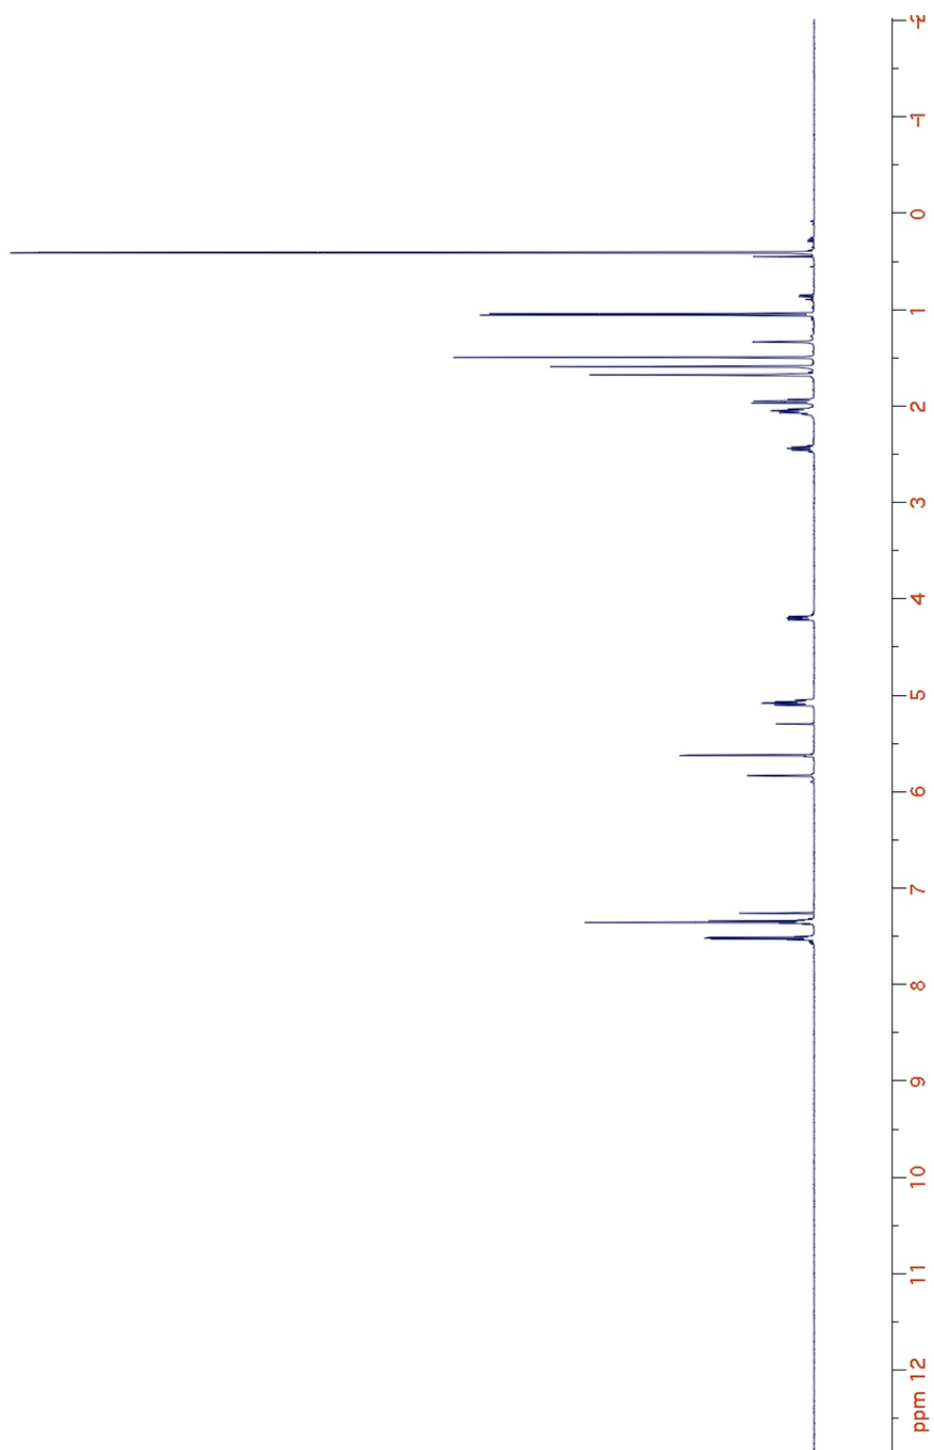

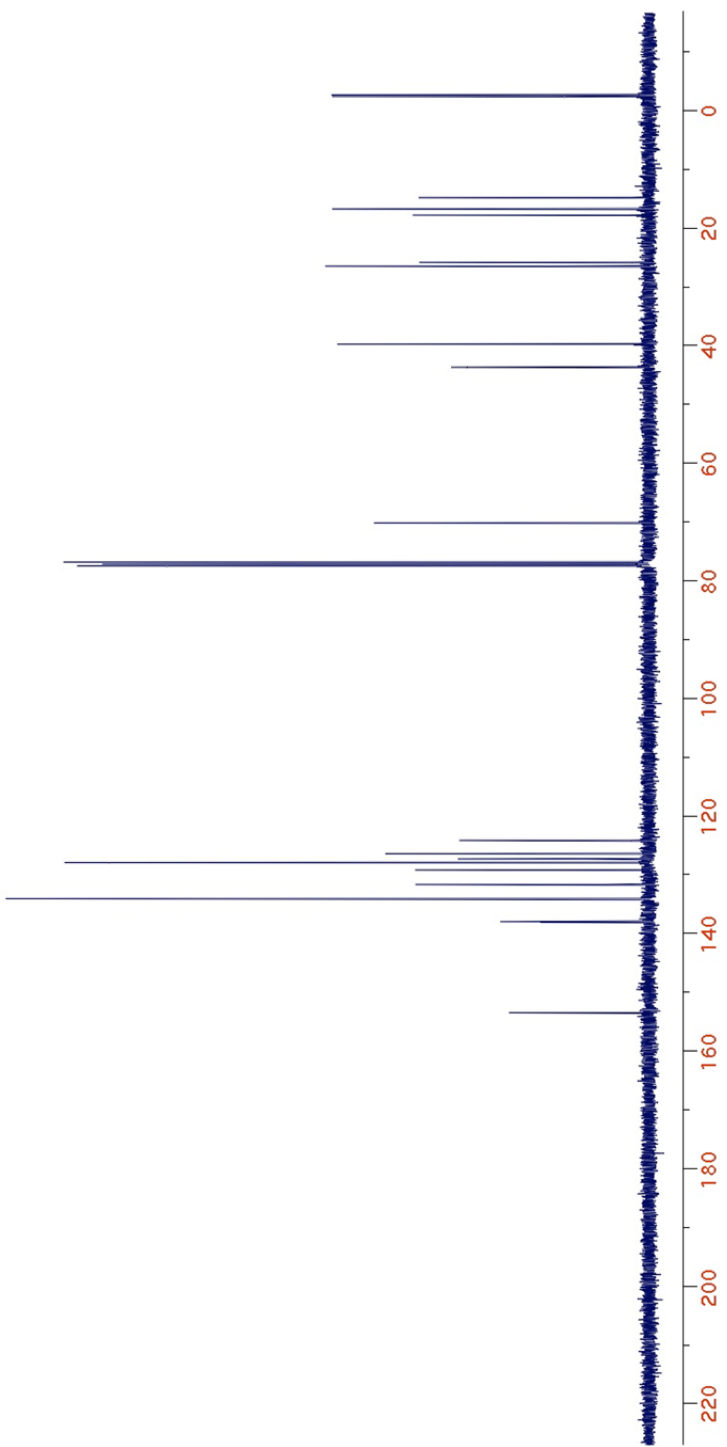

**Racemate:**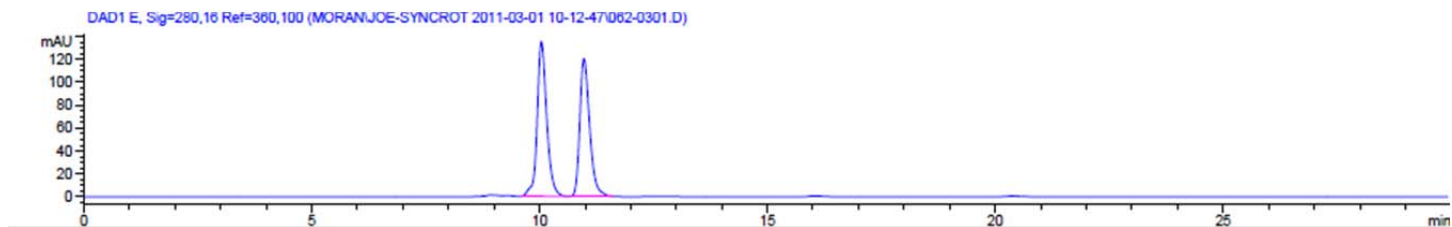

Signal 5: DAD1 E, Sig=280,16 Ref=360,100

| Peak # | RetTime [min] | Type | Width [min] | Area [mAU*s] | Height [mAU] | Area %  |
|--------|---------------|------|-------------|--------------|--------------|---------|
| 1      | 10.039        | BB   | 0.2187      | 1978.67078   | 135.19614    | 52.2246 |
| 2      | 10.973        | BB   | 0.2273      | 1810.09985   | 120.48206    | 47.7754 |

Totals : 3788.77063 255.67819

**(R)-DM-SEGPPOS (from alcohol oxidation level):**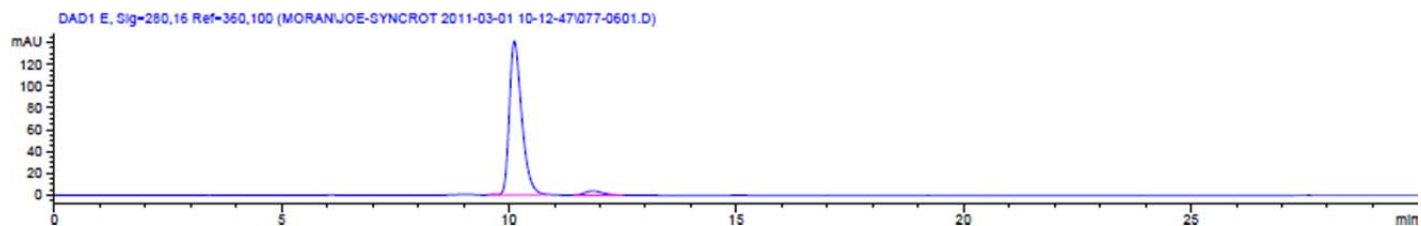

Signal 5: DAD1 E, Sig=280,16 Ref=360,100

| Peak # | RetTime [min] | Type | Width [min] | Area [mAU*s] | Height [mAU] | Area %  |
|--------|---------------|------|-------------|--------------|--------------|---------|
| 1      | 10.117        | BB   | 0.2869      | 2673.25366   | 141.15735    | 96.1476 |
| 2      | 11.840        | BB   | 0.4148      | 107.11011    | 3.84681      | 3.8524  |

Totals : 2780.36377 145.00416

## Racemate

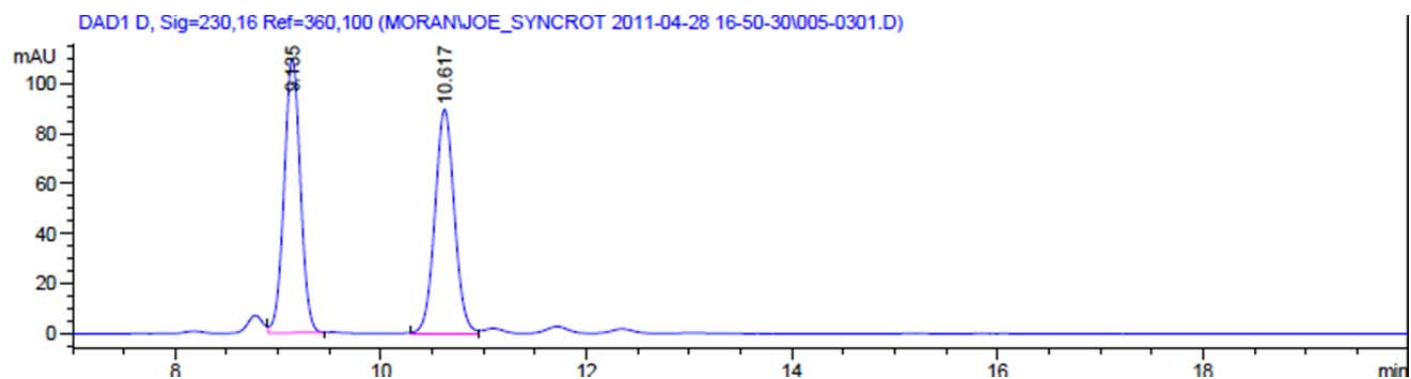

Signal 4: DAD1 D, Sig=230,16 Ref=360,100

| Peak # | RetTime [min] | Type | Width [min] | Area [mAU*s] | Height [mAU] | Area %  |
|--------|---------------|------|-------------|--------------|--------------|---------|
| 1      | 9.135         | VB   | 0.1683      | 1206.18140   | 109.68349    | 50.6125 |
| 2      | 10.617        | BV   | 0.2035      | 1176.98633   | 89.46140     | 49.3875 |

Totals : 2383.16772 199.14490

## (R)-DM-SEGPPOS (from aldehyde oxidation level):

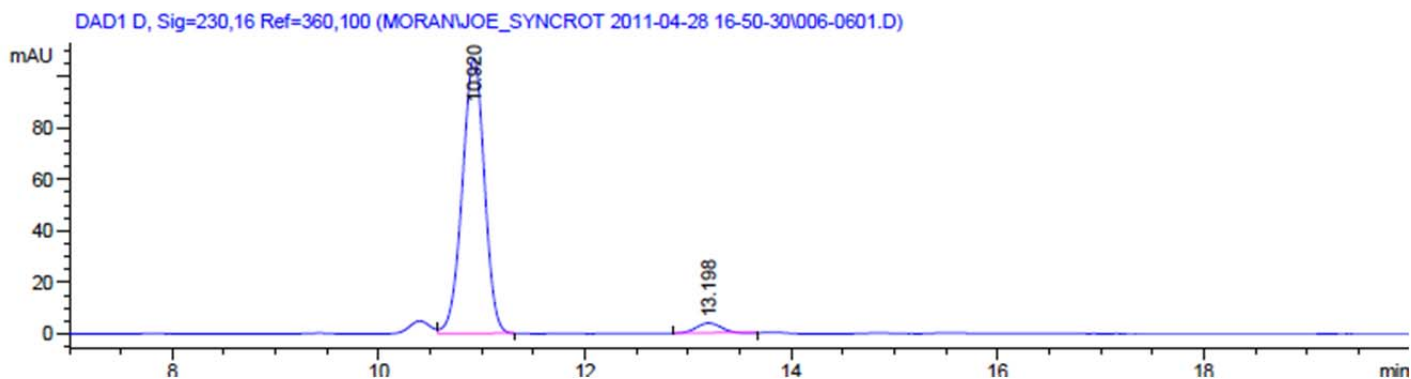

Signal 4: DAD1 D, Sig=230,16 Ref=360,100

| Peak # | RetTime [min] | Type | Width [min] | Area [mAU*s] | Height [mAU] | Area %  |
|--------|---------------|------|-------------|--------------|--------------|---------|
| 1      | 10.920        | VB   | 0.2321      | 1598.96094   | 107.14587    | 96.0828 |
| 2      | 13.198        | BB   | 0.2653      | 65.18731     | 3.89334      | 3.9172  |

Totals : 1664.14825 111.03922

**(3*R*,4*S*,*Z*)-2-(dimethyl(phenyl)silyl)-3,6,10-trimethylundeca-1,5,9-trien-4-ol (4h)**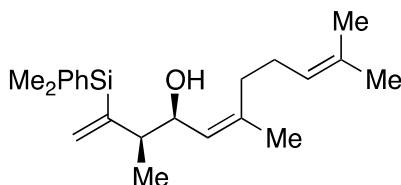

**From Alcohol Oxidation Level:** To a resealable pressure tube (13 x 100 mm) equipped with a magnetic stir bar was added RuHCl(CO)(PPh<sub>3</sub>)<sub>3</sub> (14.3 mg, 0.015 mmol, 5 mol%) and (*R*)-DM-SEGPHOS (10.8 mg, 0.015 mmol, 5 mol%). The tube was sealed with a rubber septum and purged with nitrogen. THF (0.15 mL, 2.0 M concentration with respect to alcohol), diene **1** (141 mg, 0.75 mmol, 250 mol%) and alcohol **2h** (46.3 mg, 0.30 mmol, 100 mol%) were added and the rubber septum was quickly replaced with a screw cap. The mixture was heated at 95 °C (oil bath temperature) for 48 hrs, at which point the reaction mixture was allowed to cool to ambient temperature. The reaction mixture was concentrated *in vacuo* and purified by flash column chromatography (SiO<sub>2</sub>; 3% EtOAc/hexanes) to furnish the title compound (65.7 mg, 0.192 mmol, *syn:anti* = ≥20:1) as a colorless oil in 64% yield.

**From Aldehyde Oxidation Level:** To a resealable pressure tube (13 x 100 mm) equipped with a magnetic stir bar was added RuHCl(CO)(PPh<sub>3</sub>)<sub>3</sub> (14.3 mg, 0.015 mmol, 5 mol%) and (*R*)-DM-SEGPHOS (10.8 mg, 0.015 mmol, 5 mol%). The tube was sealed with a rubber septum and purged with nitrogen. Toluene (0.15 mL, 2.0 M concentration with respect to aldehyde), diene **1** (113 mg, 0.6 mmol, 200 mol%), aldehyde **3h** (45.7 mg, 0.30 mmol, 100 mol%) and isopropanol (46 μL, 0.60 mmol, 200 mol%) were added and the rubber septum was quickly replaced with a screw cap. The mixture was heated at 95 °C (oil bath temperature) for 48 hrs, at which point the reaction mixture was allowed to cool to ambient temperature. The reaction mixture was concentrated *in vacuo* and purified by flash column chromatography (SiO<sub>2</sub>; 3% EtOAc/hexanes) to furnish the title compound (67.4 mg, 0.20 mmol, *syn:anti* = ≥20:1) as a colorless oil in 66% yield.

**<sup>1</sup>H NMR** (400 MHz, CDCl<sub>3</sub>): δ 7.52-7.48 (m, 2H), 7.36-7.32 (m, 3H), 5.83 (dd, *J* = 2.3, 1.0 Hz, 1H), 5.60 (d, *J* = 2.3 Hz, 1H), 5.07-5.01 (m, 2H), 4.18 (ddd, *J* = 8.8, 5.7, 2.8 Hz, 1H), 2.41 (qdd, *J* = 6.9, 5.7, 1.0 Hz, 1H), 2.07-1.86 (m, 4H), 1.68 (s, 3H), 1.64 (d, *J* = 1.4 Hz, 3H), 1.59 (s, 3H), 1.31 (d, *J* = 2.8 Hz, 1H), 1.05 (d, *J* = 6.9 Hz, 3H), 0.390 (s, 3H), 0.388 (s, 3H).

**<sup>13</sup>C NMR** (100 MHz, CDCl<sub>3</sub>): δ 153.5, 138.4, 138.2, 134.1, 132.2, 129.2, 127.9, 127.6, 127.3, 124.2, 70.0, 43.7, 32.4, 26.5, 25.8, 23.4, 17.9, 15.4, -2.5, -2.7.

**HRMS** (CI) Calcd. for C<sub>22</sub>H<sub>34</sub>OSi (M<sup>+</sup>): 342.2379, Found: 342.2376.

[α]<sub>D</sub><sup>25</sup> = -2 (c = 1.0, CH<sub>2</sub>Cl<sub>2</sub>).

**FTIR** (neat): 2962, 1448, 1427, 1375, 1247, 1109, 996, 927, 831, 815, 773, 731, 700 cm<sup>-1</sup>.

**GC** The compound was converted to the conventional crotylation product for analysis; (Cyclosil-B: Initial temperature: 80 °C (1 min hold), final temperature: 220 °C; rate: 2.5 C/min) *t*<sub>major</sub> = 25.0 min, *t*<sub>minor</sub> = 24.8 min ee = 86%.



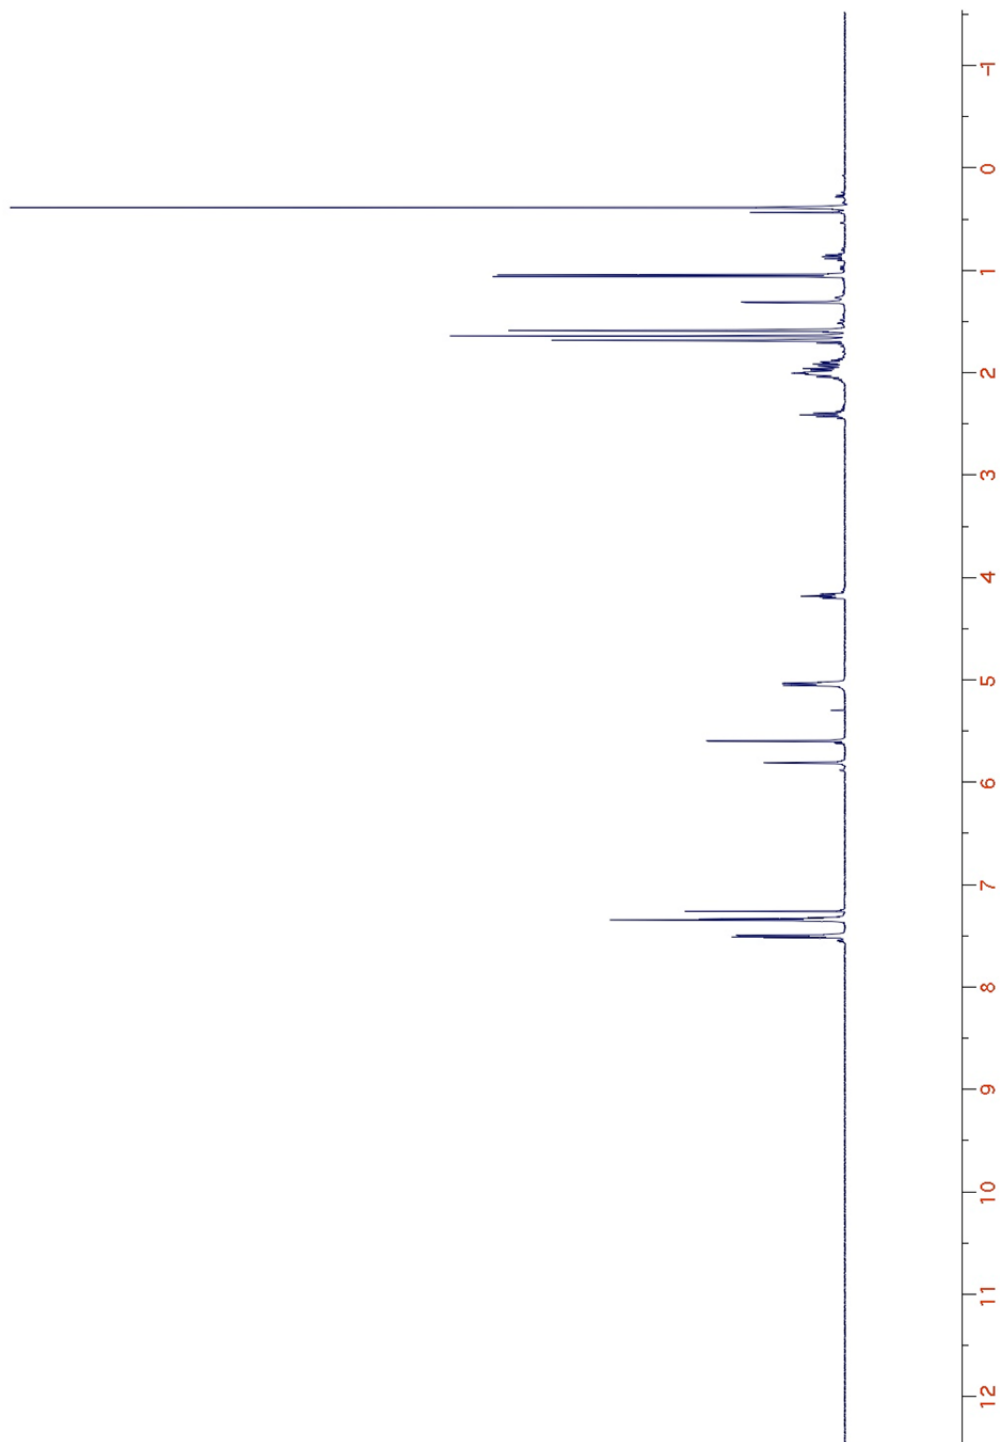

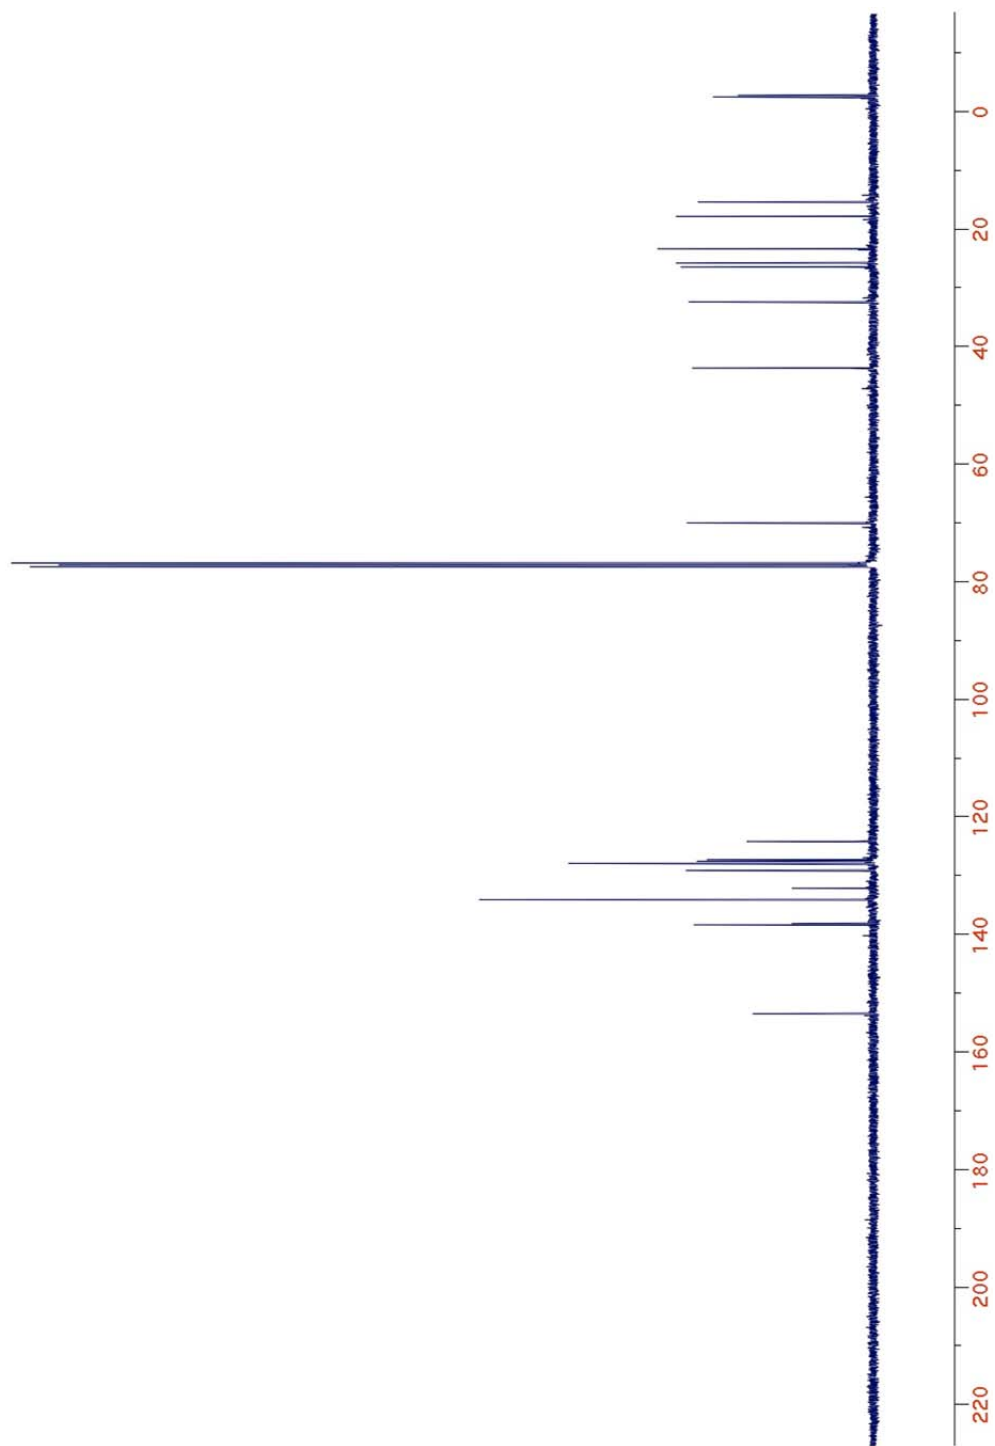

## Racemate

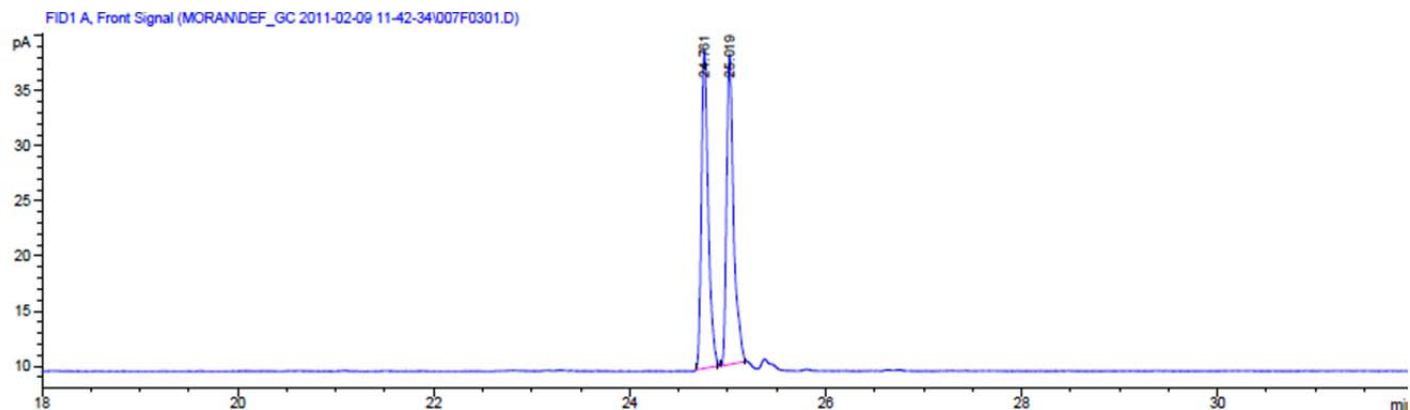

Signal 1: FID1 A, Front Signal

| Peak # | RetTime [min] | Type | Width [min] | Area [pA*s] | Height [pA] | Area %   |
|--------|---------------|------|-------------|-------------|-------------|----------|
| 1      | 24.761        | BB   | 0.0723      | 139.23294   | 28.85896    | 49.84236 |
| 2      | 25.019        | BB   | 0.0732      | 140.11368   | 28.19425    | 50.15764 |

Totals : 279.34662 57.05321

## (R)-DM-SEGPPOS (from alcohol oxidation level)

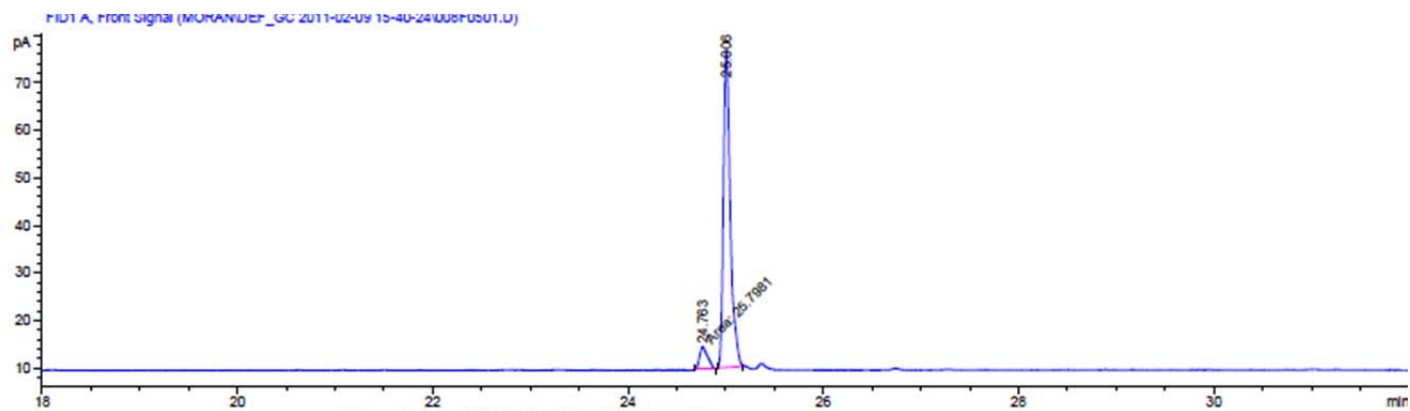

Signal 1: FID1 A, Front Signal

| Peak # | RetTime [min] | Type | Width [min] | Area [pA*s] | Height [pA] | Area %   |
|--------|---------------|------|-------------|-------------|-------------|----------|
| 1      | 24.763        | MM   | 0.0927      | 25.79811    | 4.63718     | 7.31921  |
| 2      | 25.006        | BB   | 0.0739      | 326.67331   | 66.80246    | 92.68079 |

Totals : 352.47142 71.43964

**(R)-DM-SEGPPOS (from aldehyde oxidation level)**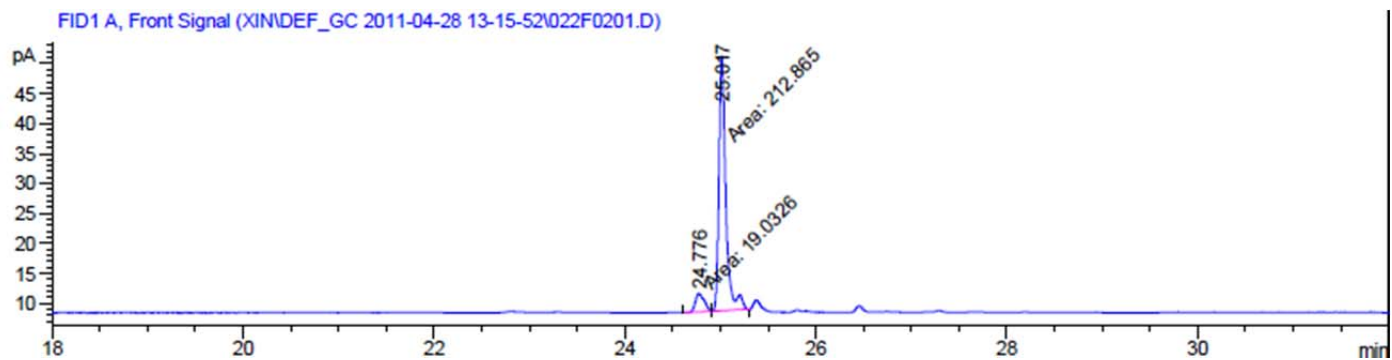

Signal 1: FID1 A, Front Signal

| Peak #   | RetTime [min] | Type | Width [min] | Area [pA*s] | Height [pA] | Area %   |
|----------|---------------|------|-------------|-------------|-------------|----------|
| 1        | 24.776        | MF   | 0.1042      | 19.03261    | 3.04311     | 8.20734  |
| 2        | 25.017        | FM   | 0.0835      | 212.86478   | 42.46641    | 91.79266 |
| Totals : |               |      |             | 231.89738   | 45.50951    |          |

**(3*R*,4*S*)-2-(dimethyl(phenyl)silyl)-3-methyldec-1-en-4-ol (4i)**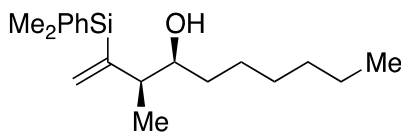

**From Alcohol Oxidation Level:** To a resealable pressure tube (13 x 100 mm) equipped with a magnetic stir bar was added RuHCl(CO)(PPh<sub>3</sub>)<sub>3</sub> (20.0 mg, 0.021 mmol, 7 mol%) and (*R*)-DM-SEGPHOS (15.2 mg, 0.021 mmol, 7 mol%). The tube was sealed with a rubber septum and purged with nitrogen. THF (0.15 mL, 2.0 M concentration with respect to alcohol), diene **1** (141 mg, 0.75 mmol, 250 mol%) and alcohol **2i** (34.9 mg, 0.30 mmol, 100 mol%) were added and the rubber septum was quickly replaced with a screw cap. The mixture was heated at 95 °C (oil bath temperature) for 48 hrs, at which point the reaction mixture was allowed to cool to ambient temperature. The reaction mixture was concentrated *in vacuo* and purified by flash column chromatography (SiO<sub>2</sub>; 3% EtOAc/hexanes) to furnish the title compound (59.1 mg, 0.20 mmol, *syn:anti* = ≥20:1) as a colorless oil in 65% yield and 88% ee.

**From Aldehyde Oxidation Level:** To a resealable pressure tube (13 x 100 mm) equipped with a magnetic stir bar was added RuHCl(CO)(PPh<sub>3</sub>)<sub>3</sub> (20.0 mg, 0.021 mmol, 7 mol%) and (*R*)-DM-SEGPHOS (15.2 mg, 0.021 mmol, 7 mol%). The tube was sealed with a rubber septum and purged with nitrogen. THF (0.15 mL, 2.0 M concentration with respect to aldehyde), diene **1** (141 mg, 0.75 mmol, 250 mol%), isopropyl alcohol (0.046 mL, 0.6 mmol, 200 mol%) and aldehyde **3i** (34.2 mg, 0.30 mmol, 100 mol%) were added and the rubber septum was quickly replaced with a screw cap. The mixture was heated at 95 °C (oil bath temperature) for 72 hrs, at which point the reaction mixture was allowed to cool to ambient temperature. The reaction mixture was concentrated *in vacuo* and purified by flash column chromatography (SiO<sub>2</sub>; 3% EtOAc/hexanes) to furnish the title compound (49 mg, 0.16 mmol, *syn:anti* = ≥20:1) as a colorless oil in 53% yield and 84% ee.

**<sup>1</sup>H NMR** (400 MHz, CDCl<sub>3</sub>): δ 7.53-7.50 (m, 2H), 7.38-7.34 (m, 3H), 5.81 (dd, *J* = 2.4, 1.1 Hz, 1H), 5.62 (d, *J* = 2.4 Hz, 1H), 3.40-3.35 (m, 1H), 2.41 (qdd, *J* = 6.9, 4.4, 1.0 Hz, 1H), 1.40 (d, *J* = 3.2 Hz, 1H), 1.35-1.12 (m, 10H), 0.99 (d, *J* = 6.9 Hz, 3H), 0.88 (t, *J* = 7.0 Hz, 3H), 0.41 (s, 3H), 0.40 (s, 3H).

**<sup>13</sup>C NMR** (100 MHz, CDCl<sub>3</sub>): δ 154.3, 138.1, 134.0, 129.2, 128.0, 126.8, 72.7, 43.1, 34.7, 31.9, 29.4, 26.3, 22.8, 14.2, 13.4, -2.44, -2.58.

**HRMS** (CI) Calcd. for C<sub>19</sub>H<sub>32</sub>OSi (M<sup>+</sup>-H): 303.2144, Found: 303.2145.

[α]<sub>D</sub><sup>25</sup> = -14 (c = 1.0, CH<sub>2</sub>Cl<sub>2</sub>).

**FTIR** (neat): 2955, 2926, 1427, 1248, 1109, 928, 908, 831, 815, 773, 731, 699 cm<sup>-1</sup>.

**HPLC** (Chiralcel AD-H/AD-H column, hexanes:*i*-PrOH = 99.5:0.5, 0.4 mL/min, 210 nm), *t*<sub>major</sub> = 41.2 min, *t*<sub>minor</sub> = 44.3 min.

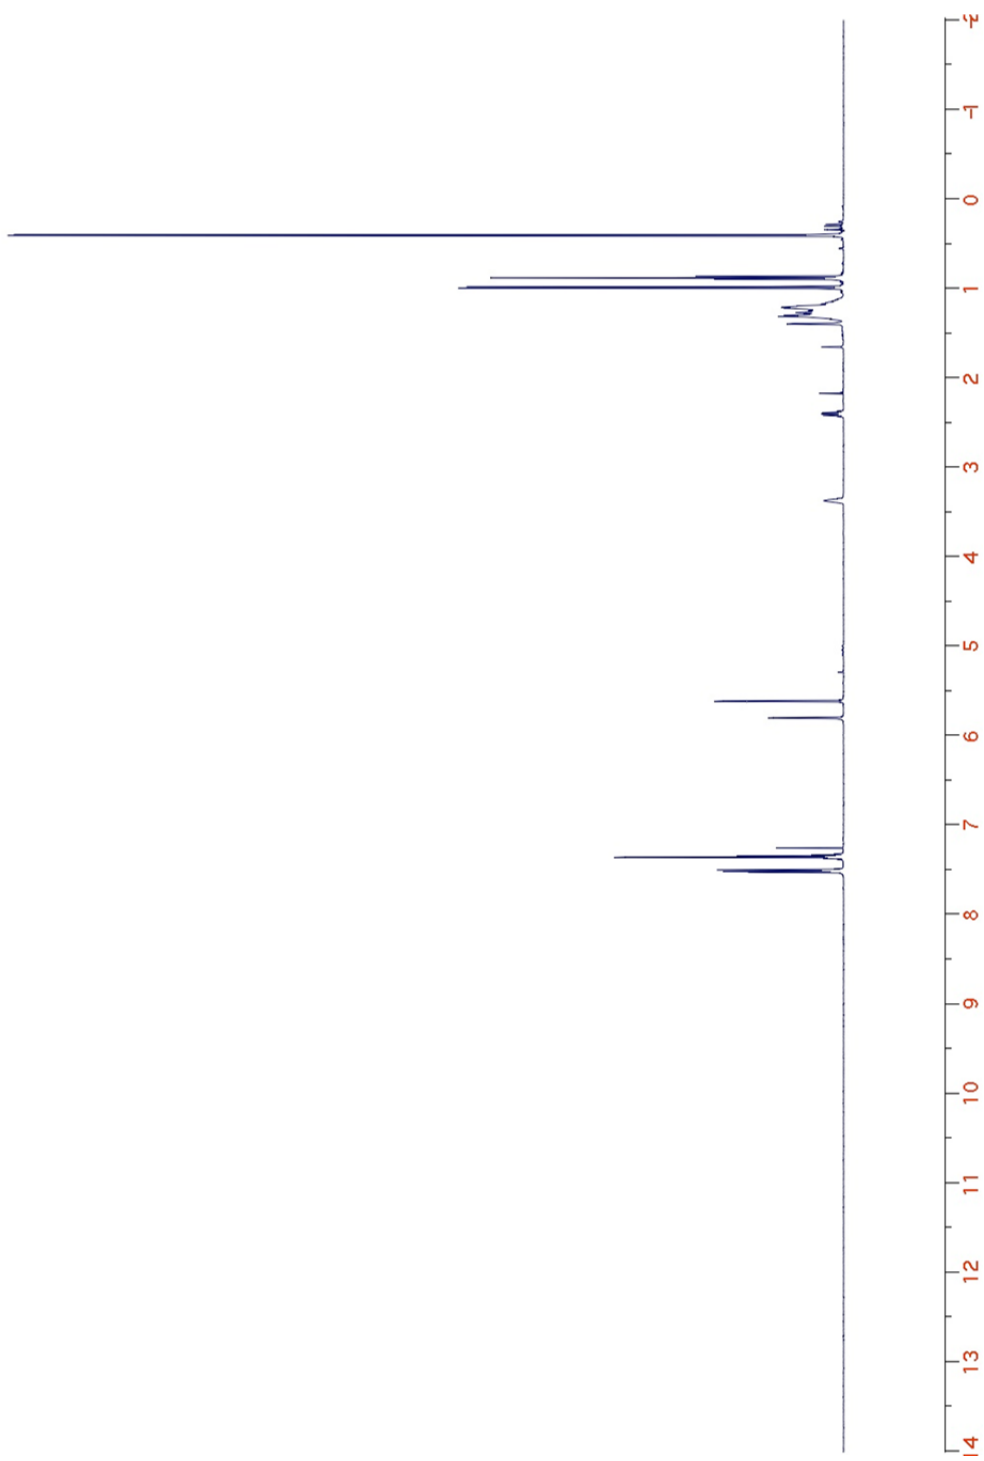

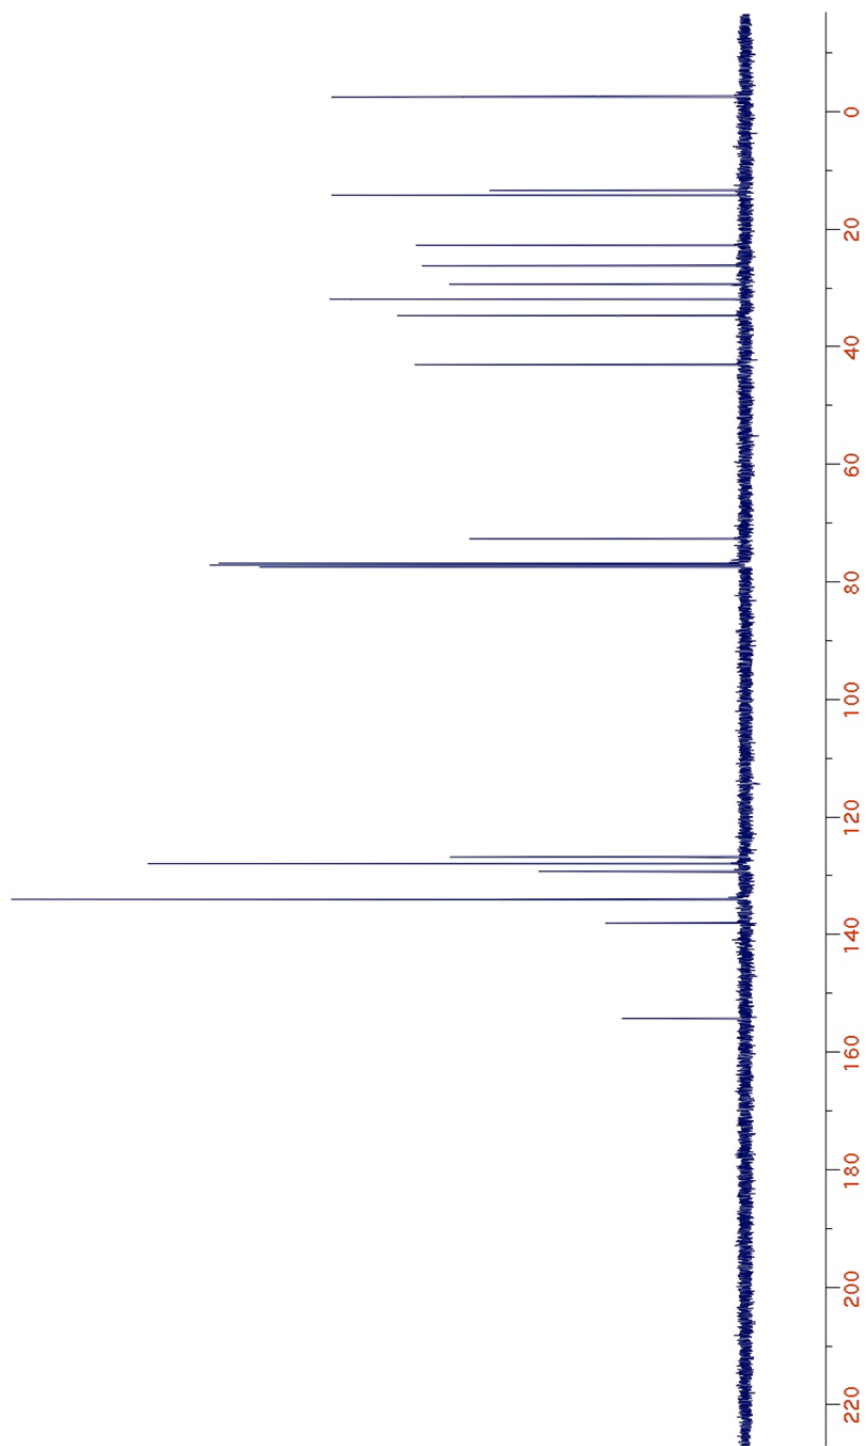

## Racemate

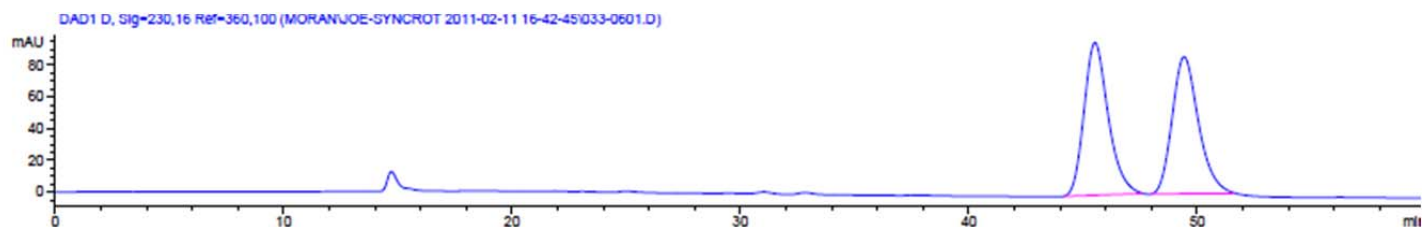

Signal 3: DAD1 C, Sig=210,8 Ref=360,100

| Peak # | RetTime [min] | Type | Width [min] | Area [mAU*s] | Height [mAU] | Area %  |
|--------|---------------|------|-------------|--------------|--------------|---------|
| 1      | 45.523        | BB   | 1.1157      | 2.61189e4    | 351.97995    | 50.0715 |
| 2      | 49.426        | BB   | 1.2408      | 2.60443e4    | 316.91095    | 49.9285 |

Totals : 5.21631e4 668.89090

## (R)-DM-SEGPHOS (from alcohol oxidation level)

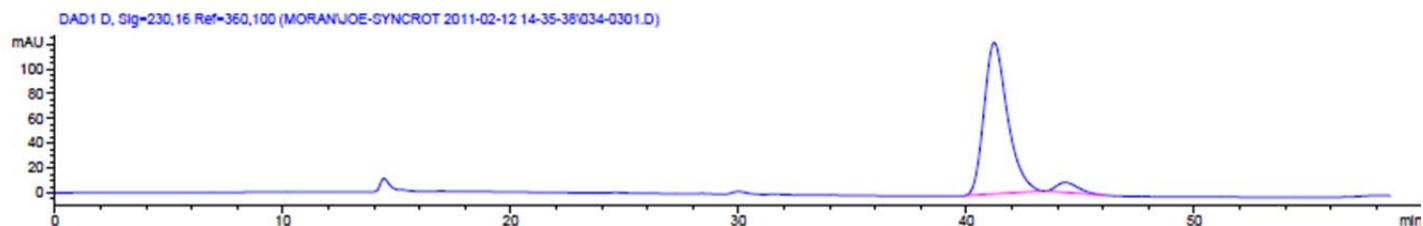

Signal 4: DAD1 D, Sig=230,16 Ref=360,100

| Peak # | RetTime [min] | Type | Width [min] | Area [mAU*s] | Height [mAU] | Area %  |
|--------|---------------|------|-------------|--------------|--------------|---------|
| 1      | 41.223        | BB   | 1.0877      | 8788.80957   | 122.10503    | 94.1352 |
| 2      | 44.341        | BB   | 0.9771      | 547.56091    | 8.13638      | 5.8648  |

Totals : 9336.37048 130.24141



**Racemate:**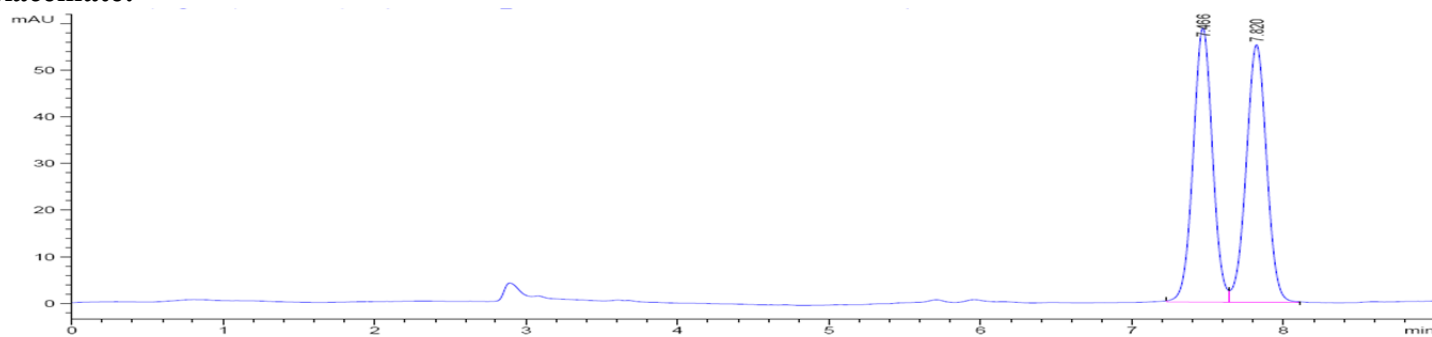

Signal 1: DAD1 D, Sig=230,16 Ref=360,100

| Peak # | RetTime [min] | Type | Width [min] | Area [mAU*s] | Height [mAU] | Area %  |
|--------|---------------|------|-------------|--------------|--------------|---------|
| 1      | 7.466         | BV   | 0.1374      | 521.84729    | 58.85293     | 50.2049 |
| 2      | 7.820         | VB   | 0.1452      | 517.58765    | 55.27609     | 49.7951 |

**(R)-DM-SEGPPOS (from aldehyde oxidation level)**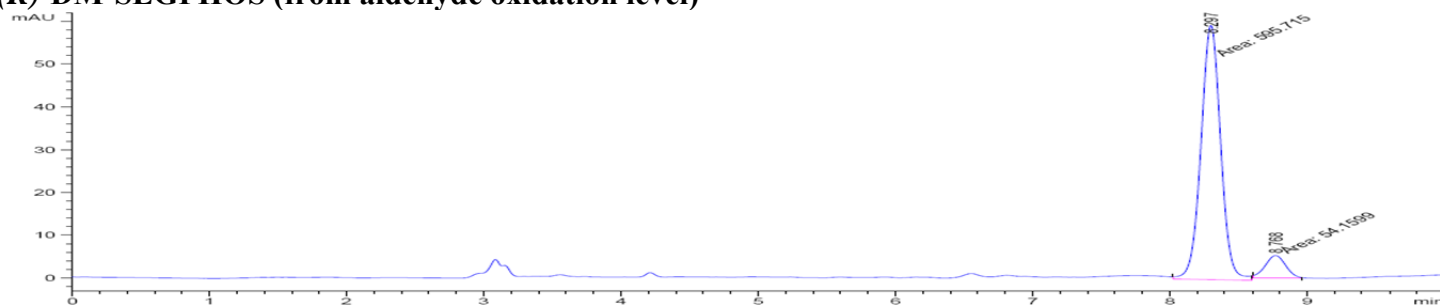

Signal 1: DAD1 D, Sig=230,16 Ref=360,100

| Peak # | RetTime [min] | Type | Width [min] | Area [mAU*s] | Height [mAU] | Area %  |
|--------|---------------|------|-------------|--------------|--------------|---------|
| 1      | 8.297         | MM   | 0.1667      | 595.71478    | 59.57350     | 91.6661 |
| 2      | 8.768         | MM   | 0.1713      | 54.15990     | 5.27011      | 8.3339  |

**(3*R*,4*S*)-7-(benzyloxy)-2-(dimethyl(phenyl)silyl)-3-methylhept-1-en-4-ol (4j)**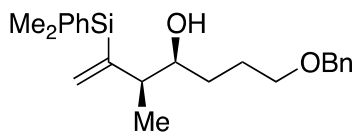

**From Alcohol Oxidation Level:** To a resealable pressure tube (13 x 100 mm) equipped with a magnetic stir bar was added RuHCl(CO)(PPh<sub>3</sub>)<sub>3</sub> (14.3 mg, 0.015 mmol, 5 mol%) and (*R*)-DM-SEGPHOS (10.8 mg, 0.015 mmol, 5 mol%). The tube was sealed with a rubber septum and purged with nitrogen. Toluene (0.15 mL, 2.0 M concentration with respect to alcohol), diene **1** (113 mg, 0.60 mmol, 200 mol%) and alcohol **2j** (54 mg, 0.30 mmol, 100 mol%) were added and the rubber septum was quickly replaced with a screw cap. The mixture was heated at 95 °C (oil bath temperature) for 48 hrs, at which point the reaction mixture was allowed to cool to ambient temperature. The reaction mixture was concentrated *in vacuo* and purified by flash column chromatography (SiO<sub>2</sub>; 0-15% EtOAc/hexanes) to furnish the title compound (70 mg, 0.20 mmol, *syn:anti* =  $\geq 20:1$ ) as a colorless oil in 66% yield and 86% ee.

**From Aldehyde Oxidation Level:** To a resealable pressure tube (13 x 100 mm) equipped with a magnetic stir bar was added RuHCl(CO)(PPh<sub>3</sub>)<sub>3</sub> (20.0 mg, 0.021 mmol, 7 mol%) and (*R*)-DM-SEGPHOS (15.2 mg, 0.021 mmol, 7 mol%). The tube was sealed with a rubber septum and purged with nitrogen. Toluene (0.15 mL, 2.0 M concentration with respect to aldehyde), diene **1** (141 mg, 0.75 mmol, 250 mol%), isopropyl alcohol (0.046 mL, 0.6 mmol, 200 mol%) and aldehyde **3j** (49 mg, 0.30 mmol, 100 mol%) were added and the rubber septum was quickly replaced with a screw cap. The mixture was heated at 95 °C (oil bath temperature) for 72 hrs, at which point the reaction mixture was allowed to cool to ambient temperature. The reaction mixture was concentrated *in vacuo* and purified by flash column chromatography (SiO<sub>2</sub>; 0-15% EtOAc/hexanes) to furnish the title compound (54 mg, 0.15 mmol, *syn:anti* =  $\geq 20:1$ ) as a colorless oil in 50% yield and 84% ee.

**<sup>1</sup>H NMR** (400 MHz, CDCl<sub>3</sub>):  $\delta$  7.51-7.48 (m, 2H), 7.35-7.24 (m, 8H), 5.78 (dd, *J* = 2.2, 1.2 Hz, 1H), 5.58 (d, *J* = 1.2 Hz, 1H), 4.47 (s, 2H), 3.39 (t, *J* = 6.0, 2H), 3.44 – 3.37 (m, 1H), 2.42 – 2.34 (m, 1H), 1.92 (d, *J* = 3.2 Hz, 1H), 1.72 – 1.42 (m, 3H), 1.40 – 1.25 (m, 1H), 1.00 (d, *J* = 7.2 Hz, 3H), 0.39 (s, 3H), 0.38 (s, 3H).

**<sup>13</sup>C NMR** (100 MHz, CDCl<sub>3</sub>):  $\delta$  154.0, 138.4, 138.0, 133.9, 129.1, 128.3, 127.8, 127.6, 127.5, 126.8, 72.9, 72.8, 70.3, 43.5, 31.8, 26.6, 14.2, -2.6, -2.7.

**FTIR** (neat): 3427, 3066, 2955, 2867, 1495, 1453, 1427, 1407, 1362, 1248, 1203, 1108, 1027, 966, 929, 832, 816, 774, 733, 699cm<sup>-1</sup>.

**HRMS** (CI) Calcd. for C<sub>23</sub>H<sub>32</sub>O<sub>2</sub>Si [M-OH]<sup>+</sup>: 351.2144, Found: 351.2139.

[ $\alpha$ ]<sub>D</sub><sup>25</sup> = -12 (c = 1.0, CH<sub>2</sub>Cl<sub>2</sub>).

**HPLC**: (Chiralcel AD-H/AD-H column, hexanes:*i*-PrOH = 99:1, 1 mL/min, 230 nm), *t*<sub>major</sub> = 32.6 min, *t*<sub>minor</sub> = 35.9 min;

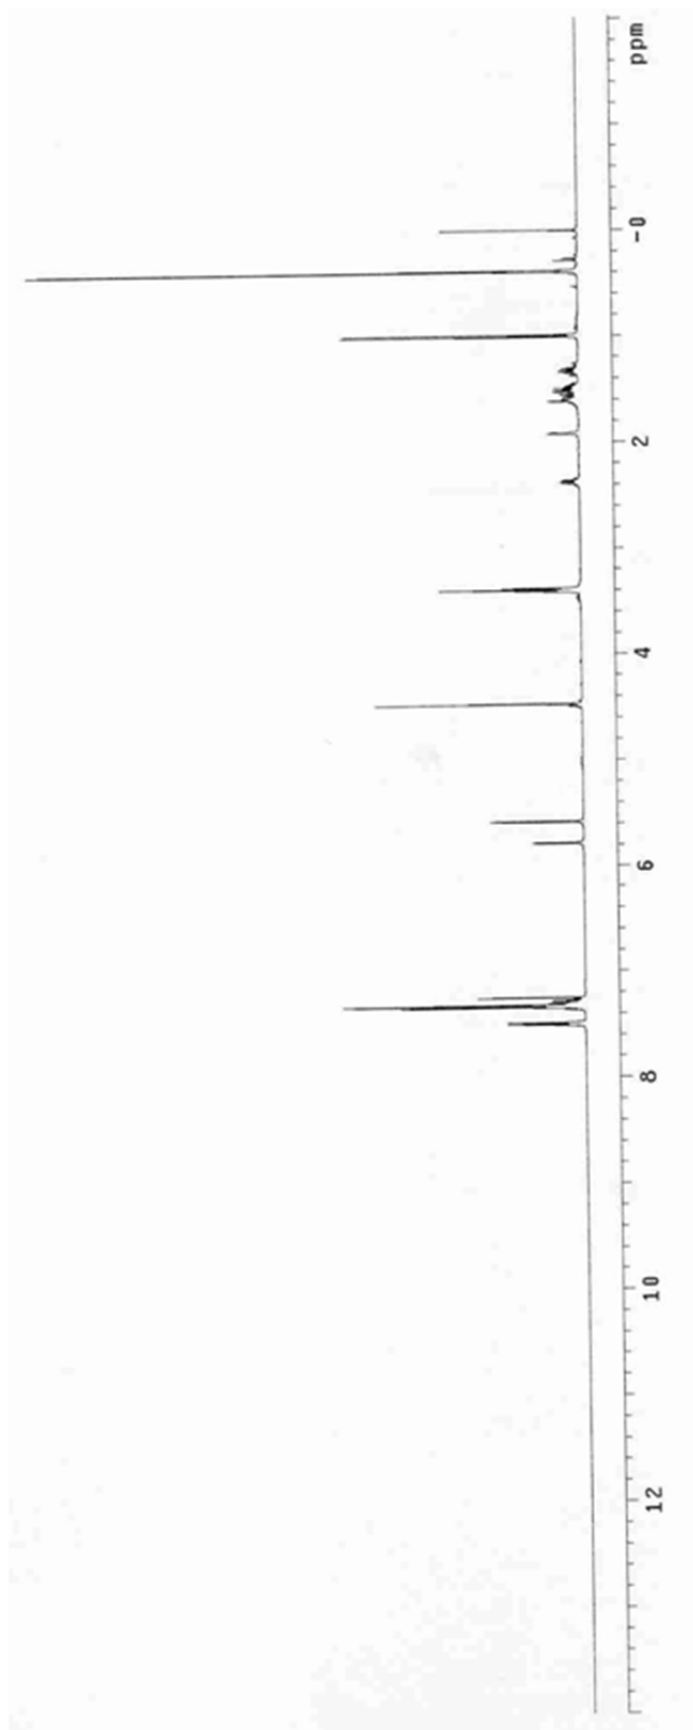

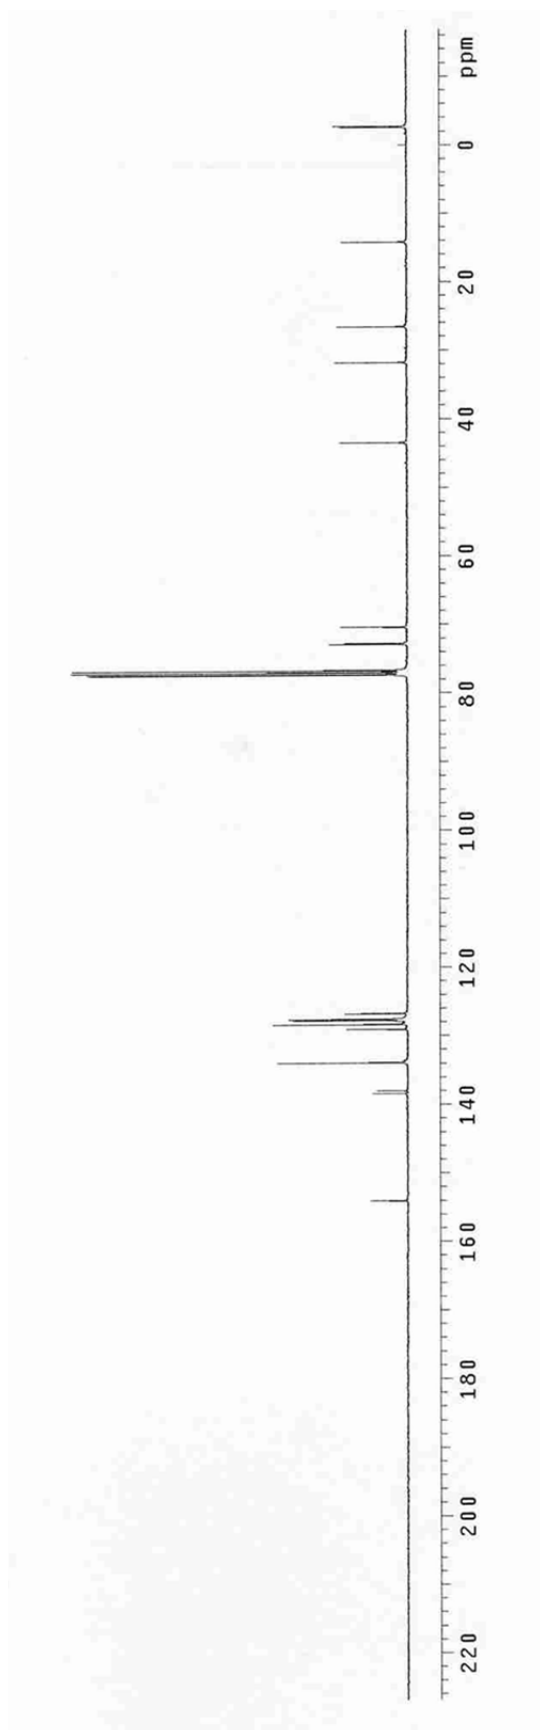

**Racemic:**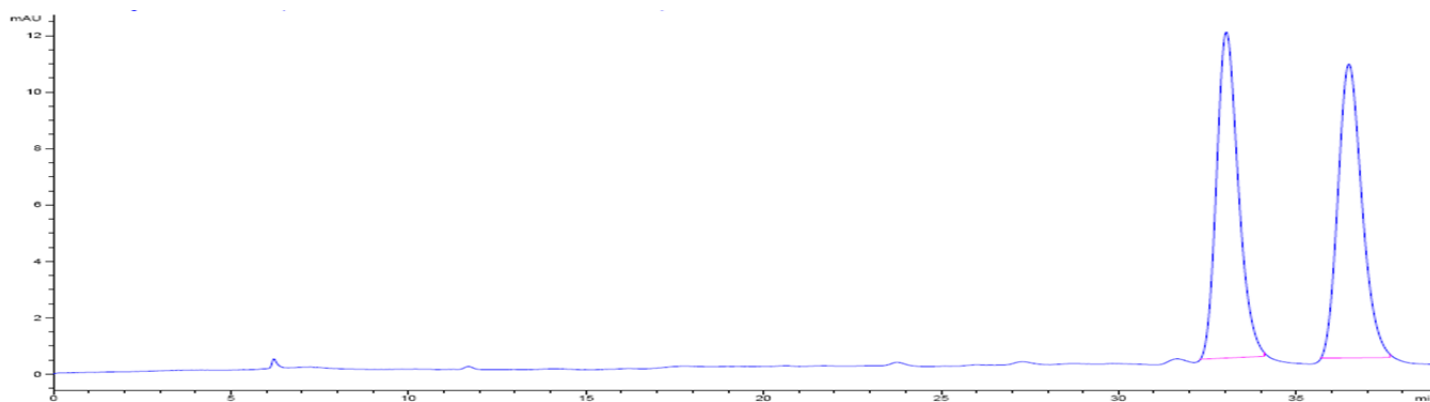

Signal 1: DAD1 D, Sig=230,16 Ref=360,100

| Peak # | RetTime [min] | Type | Width [min] | Area [mAU*s] | Height [mAU] | Area %  |
|--------|---------------|------|-------------|--------------|--------------|---------|
| 1      | 33.032        | BB   | 0.6446      | 492.28772    | 11.56510     | 50.1202 |
| 2      | 36.487        | BB   | 0.7103      | 489.92709    | 10.42418     | 49.8798 |

Totals : 982.21481 21.98927

**(R)-DM-Segphos (from alcohol oxidation level):**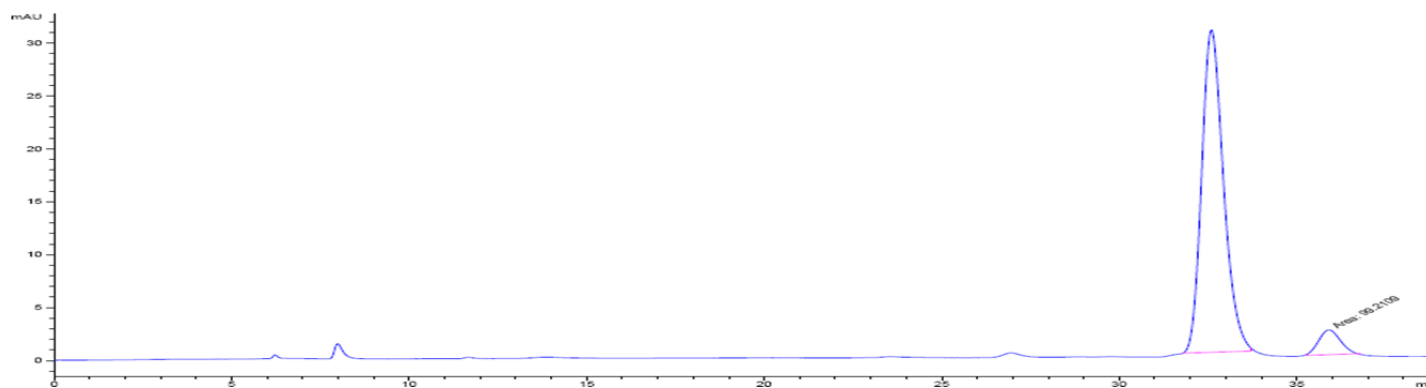

Signal 1: DAD1 D, Sig=230,16 Ref=360,100

| Peak # | RetTime [min] | Type | Width [min] | Area [mAU*s] | Height [mAU] | Area %  |
|--------|---------------|------|-------------|--------------|--------------|---------|
| 1      | 32.591        | BB   | 0.6532      | 1302.37231   | 30.43635     | 92.9215 |
| 2      | 35.900        | MM   | 0.7039      | 99.21086     | 2.34906      | 7.0785  |

Totals : 1401.58318 32.78541

**Racemic:**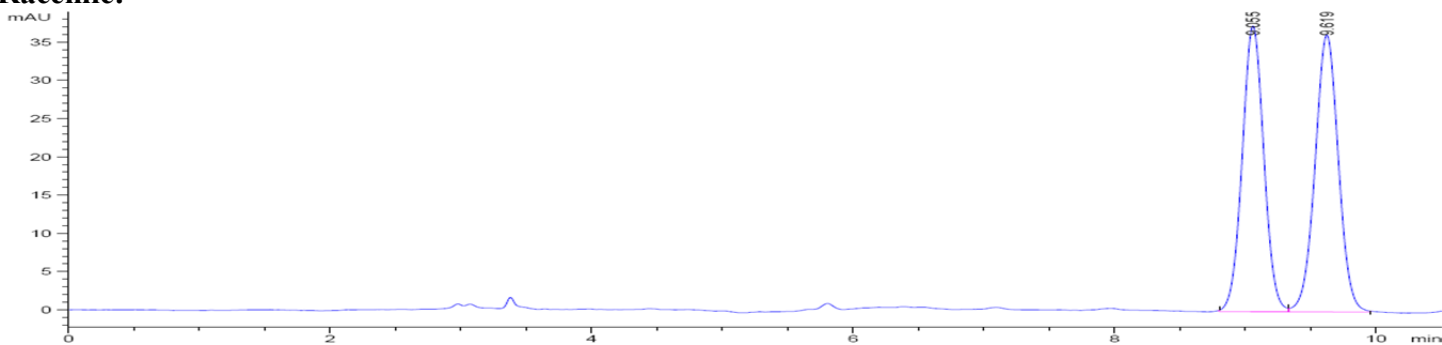

| Peak # | RetTime [min] | Type | Width [min] | Area [mAU*s] | Height [mAU] | Area %  |
|--------|---------------|------|-------------|--------------|--------------|---------|
| 1      | 9.055         | BV   | 0.1782      | 430.01682    | 37.38885     | 48.7918 |
| 2      | 9.619         | VB   | 0.1911      | 451.31348    | 36.27737     | 51.2082 |

**(R)-DM-Segphos (from aldehyde oxidation level):**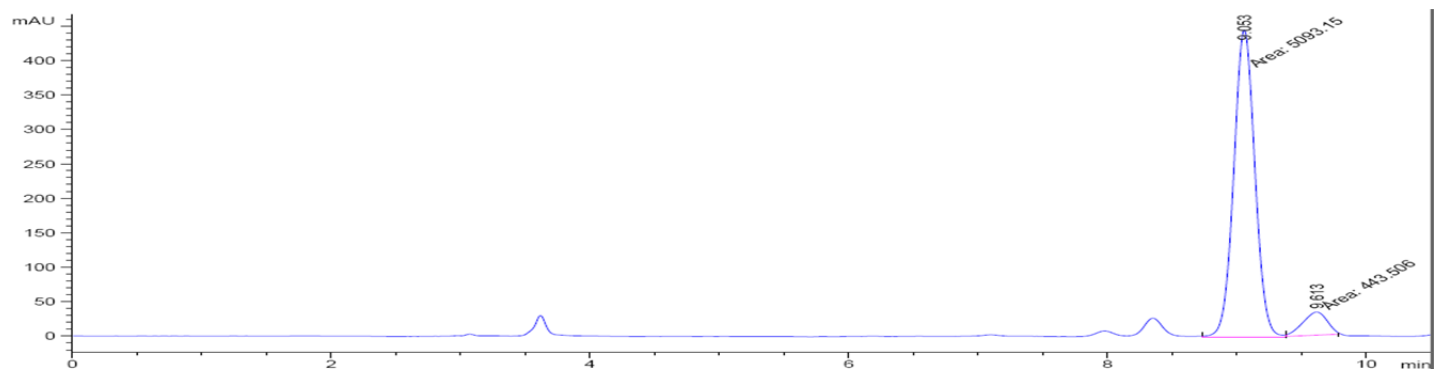

| Peak # | RetTime [min] | Type | Width [min] | Area [mAU*s] | Height [mAU] | Area %  |
|--------|---------------|------|-------------|--------------|--------------|---------|
| 1      | 9.053         | MM   | 0.1898      | 5093.15234   | 447.21216    | 91.9896 |
| 2      | 9.613         | MM   | 0.2187      | 443.50574    | 33.79377     | 8.0104  |

Totals : 5536.65808 481.00593

**(1R,2S)-2-methyl-1-phenylbut-3-en-1-ol (7a)**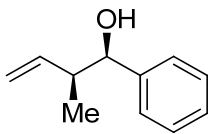

To a resealable pressure tube (13 x 100 mm) equipped with a magnetic stir bar was added  $\text{RuHCl}(\text{CO})(\text{PPh}_3)_3$  (14.3 mg, 0.015 mmol, 5 mol%) and (*R*)-DM-SEGPPOS (10.8 mg, 0.015 mmol, 5 mol%). The tube was sealed with a rubber septum and purged with nitrogen. Toluene (0.15 mL, 2.0 M concentration with respect to alcohol **2a**), diene **1** (113 mg, 0.60 mmol, 200 mol%) and alcohol **2a** (32.4 mg, 0.30 mmol, 100 mol%) were added and the rubber septum was quickly replaced with a screw cap. The mixture was heated at 95°C (oil bath temperature) for 48 hrs, at which point the reaction mixture was allowed to cool to ambient temperature. A solution of TBAF (0.9 mL, 0.9 mmol, 300 mol%, 1.0 M in THF) was added to the reaction mixture under atmosphere of nitrogen. The reaction mixture was diluted with DMSO (1.0 mL, 0.3 M concentration with respect to alcohol **2a**), capped and heated to 80 °C for 2 hr. The reaction mixture was diluted with EtOAc (25 mL) and washed with  $\text{H}_2\text{O}$  (4x10 mL). The organic layer was then dried ( $\text{MgSO}_4$ ), filtered and concentrated *in vacuo*. Purification of the residue by flash column chromatography ( $\text{SiO}_2$ ; 0-20% EtOAc/hexane) furnished the title compound (40 mg, 0.25 mmol, *syn:anti* = 13:1) as a colorless oil in 83% yield. *Spectral data is consistent with the reported literature data*<sup>4</sup>.

**<sup>1</sup>H NMR** (400 MHz,  $\text{CDCl}_3$ ):  $\delta$  7.39–7.27 (m, 5H), 5.78 (ddd,  $J = 17.0, 10.0, 6.9$  Hz, 1H), 5.08 (m, 2H), 4.65 (d,  $J = 5.3$ , 1H), 2.65–2.58 (m, 1H), 1.04 (d,  $J = 6.8$  Hz, 3H).

$[\alpha]_{\text{D}}^{25} = +24$  ( $c = 1.15$ ,  $\text{CHCl}_3$ ) (Lit $[\alpha]_{\text{D}}^{24} = -23.55$  ( $c = 1.15$ ,  $\text{CHCl}_3$ ) for 94% ee of the (1*S*,2*R*)-**4a**)

**GC**: (Cyclosil-B: Initial temperature: 50 °C (5 min hold), final temperature: 220 °C; rate: 5 C/min)  $t_{\text{major}} = 21.426$  min,  $t_{\text{minor}} = 21.536$  min ee = 87%.

<sup>4</sup> Denmark, S. E.; Fu, J. *J. Am. Chem. Soc.* **2001**, *123*, 9488.

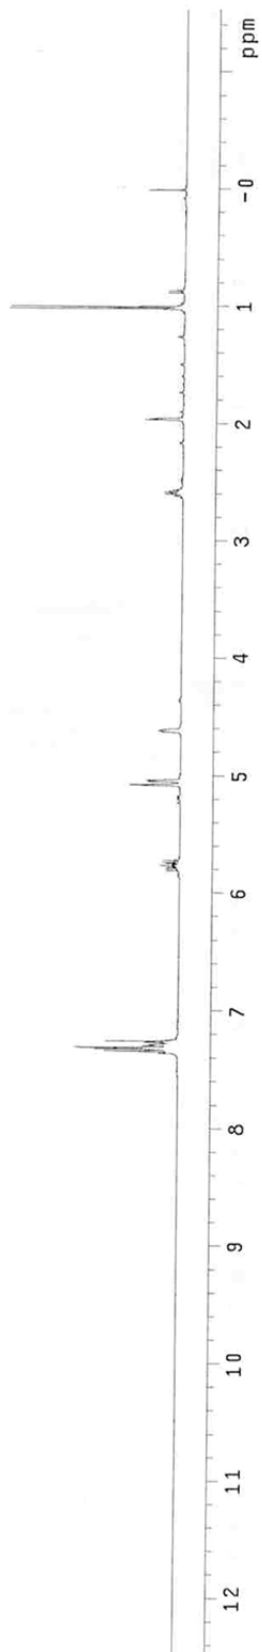



## Racemic:

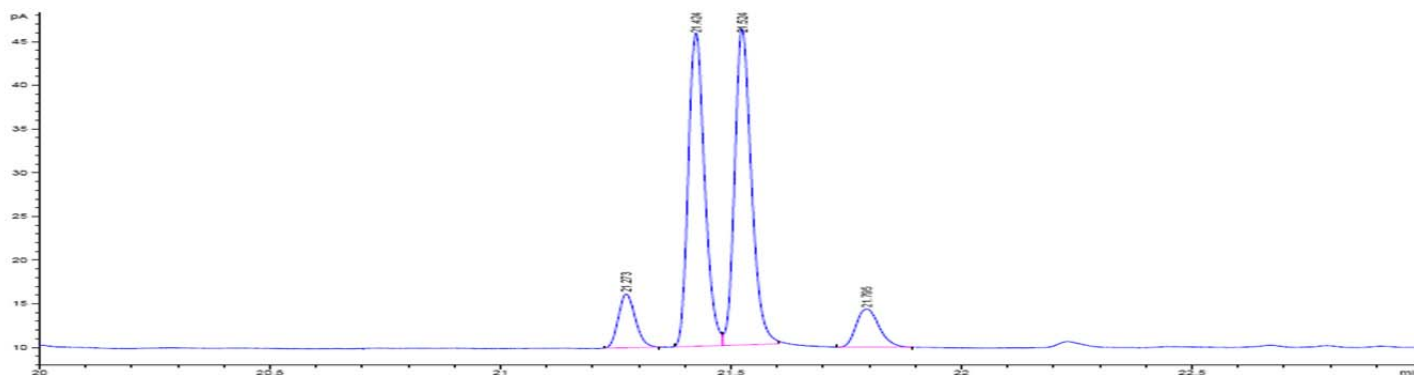

| Peak # | RetTime [min] | Type | Width [min] | Area [pA*s] | Height [pA] | Area %   |
|--------|---------------|------|-------------|-------------|-------------|----------|
| 1      | 21.273        | BB   | 0.0404      | 15.75859    | 6.13524     | 7.46287  |
| 2      | 21.424        | EV   | 0.0377      | 88.71522    | 35.82502    | 42.01329 |
| 3      | 21.524        | VB   | 0.0384      | 91.52821    | 36.13225    | 43.34545 |
| 4      | 21.795        | BB   | 0.0550      | 15.15786    | 4.36031     | 7.17838  |

Totals : 211.15987 62.45283

*(R)*-DM-Segphos: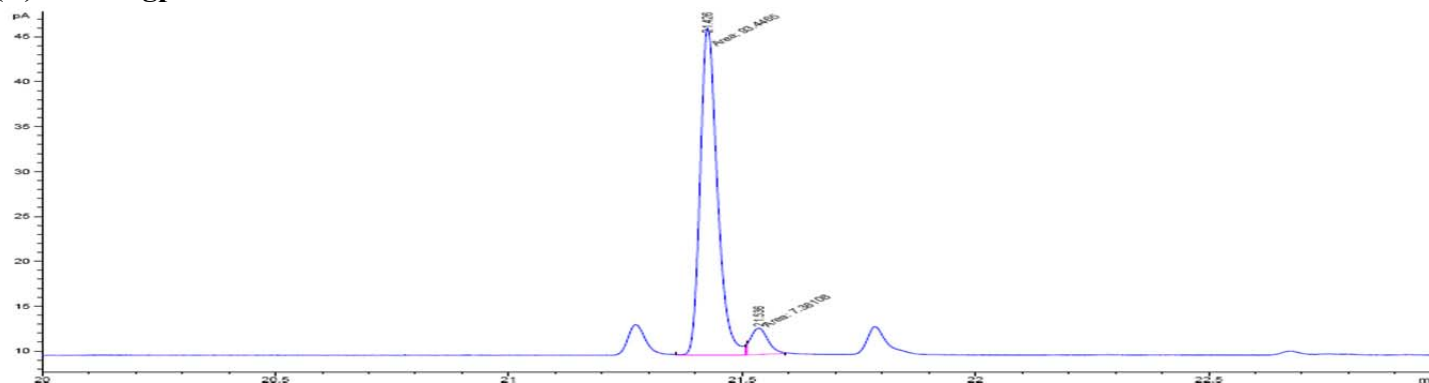

Signal 1: FID1 A, Front Signal

| Peak # | RetTime [min] | Type | Width [min] | Area [pA*s] | Height [pA] | Area %   |
|--------|---------------|------|-------------|-------------|-------------|----------|
| 1      | 21.426        | MM   | 0.0427      | 93.44648    | 36.45899    | 92.67950 |
| 2      | 21.536        | MM   | 0.0418      | 7.38108     | 2.94164     | 7.32050  |

Totals : 100.82756 39.40063

**tert-butyl((-3-(dimethyl(phenyl)silyl)-2-methyl-1-phenylbut-3-en-1-yl)oxy)dimethylsilane**

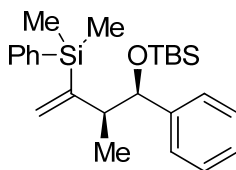

A flame dried 25 mL round bottom flask equipped with a magnetic stir bar was charged with alcohol **4a** (112 mg, 0.38 mmol, 100 mol%) and purged with nitrogen. DMF was added (1.3 mL, 0.3 M with respect to alcohol **4a**). To this solution imidazole (39 mg, 0.57 mmol, 150 mol%) and TBSCl (68 mg, 0.46 mmol, 120 mol%) were added sequentially. Upon complete consumption of starting material, as determined by TLC analysis, ammonium chloride (5 mL, sat. aq. sol.) was added. The organic layer was extracted with Et<sub>2</sub>O (3x50 mL) and the combined organic extracts dried (MgSO<sub>4</sub>), filtered, and concentrated *in vacuo*. Purification of the residue by flash column chromatography (SiO<sub>2</sub>; hexanes) furnished the title compound (126 mg, 0.31 mmol) as a colorless oil in 81% yield.

**<sup>1</sup>H NMR** (400 MHz, CDCl<sub>3</sub>): δ 7.42-7.39 (m, 2H), 7.36-7.28 (m, 3H), 7.20-7.10 (m, 3H), 7.07 – 7.05 (m, 2H), 5.84 (d, *J* = 2.4, 1H), 5.50 (d, *J* = 2.4, 1H), 4.41 (d, *J* = 4.0, 1H), 2.50 - 2.40 (m, 1H), 0.99 (d, *J* = 6.8 Hz, 3H), 0.84 (s, 9H), 0.18 (s, 3H), .16 (s, 3H), -0.06 (s, 3H), -0.33 (s, 3H).

**<sup>13</sup>C NMR** (100 MHz, CDCl<sub>3</sub>): δ 152.9, 145.2, 138.4, 134.4, 129.2, 128.0, 127.7, 127.3, 126.9, 77.9, 45.9, 26.2, 18.5, 16.6, -2.8, -3.0, -4.2, -4.5.

**FTIR** (neat): 2956, 2928, 2856, 1471, 1462, 1427, 1244, 1110, 1080, 1067, 1016, 929, 871, 831, 814, 774, 751, 733, 699 cm<sup>-1</sup>.

**HRMS** (CI) Calcd. for C<sub>25</sub>H<sub>38</sub>OSi<sub>2</sub> [M-1]<sup>+</sup>: 409.2383, Found: 409.2387.

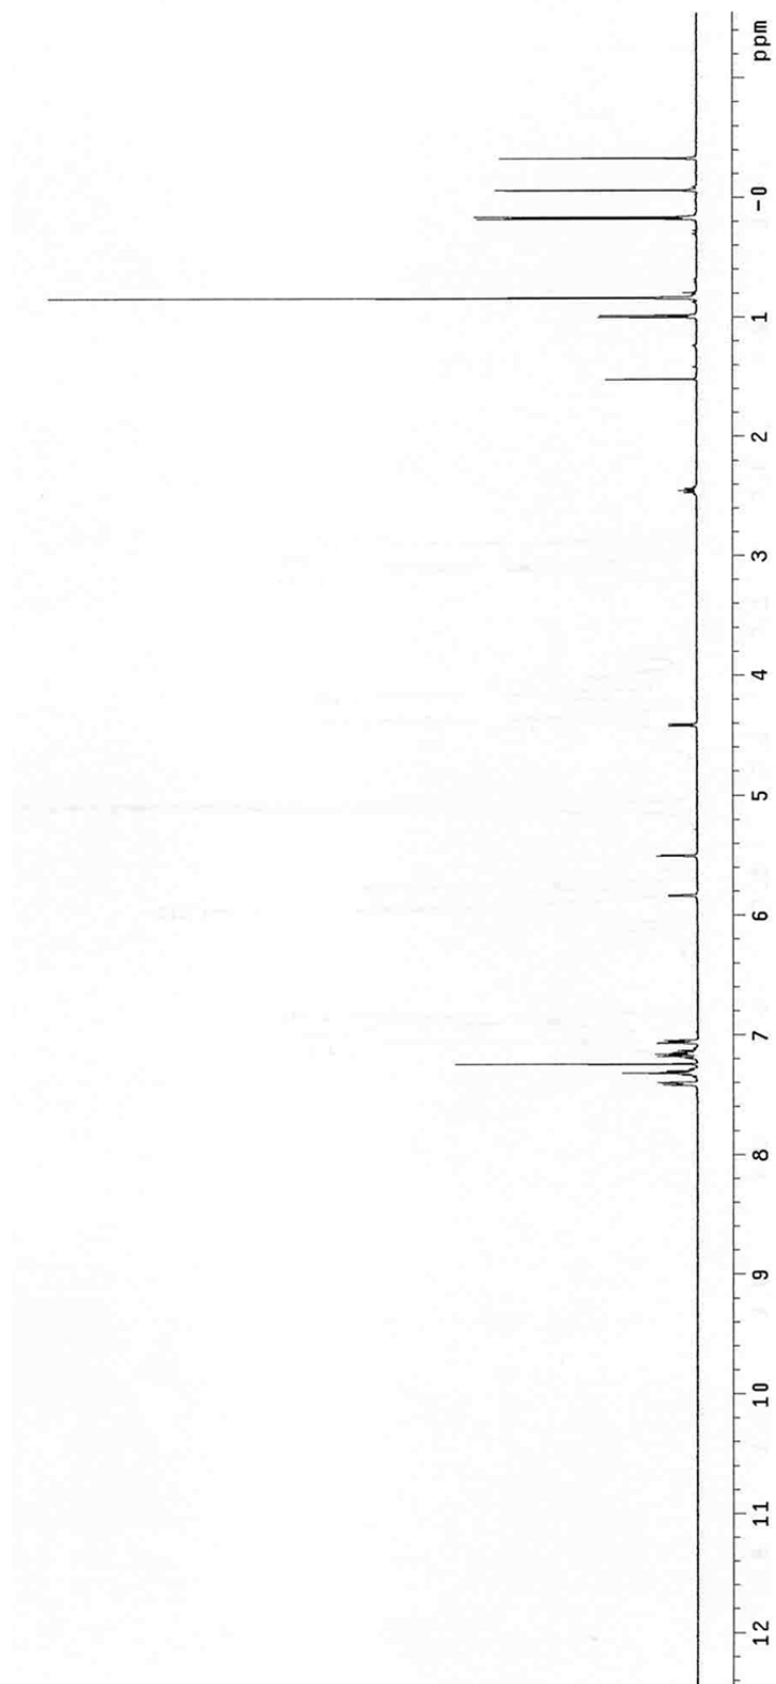

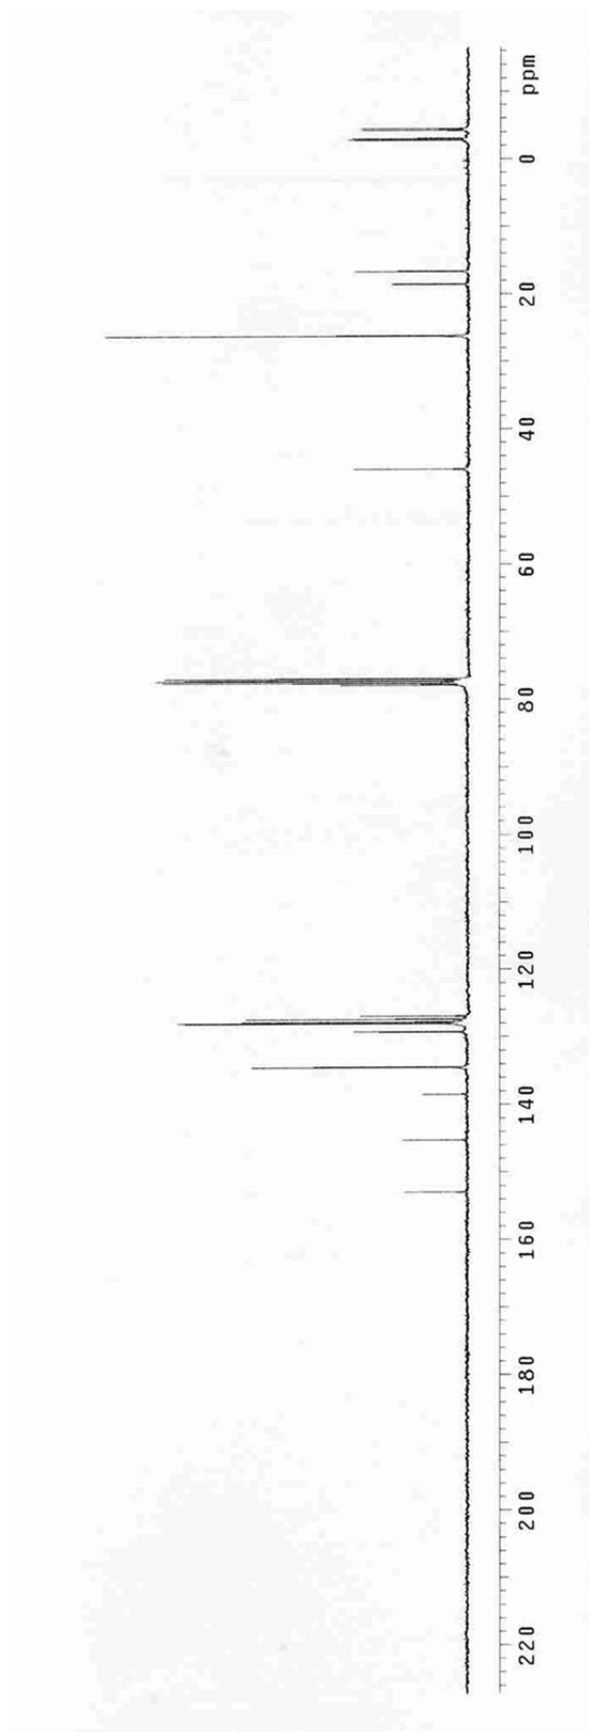

**tert-butyl(3-(dimethyl(phenyl)silyl)-4-(3-methoxyphenyl)-2-methyl-1-phenylbutoxy)dimethylsilane (5a)**

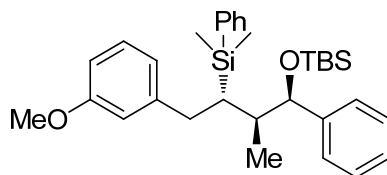

A flame dried 25 mL conical flask equipped with a magnetic stir bar was charged with TBS protected alcohol **4a** (214 mg, 0.52 mmol, 100 mol%) and purged with nitrogen. 9-BBN was added (3.1 mL, 1.56 mmol, 300 mol%, 0.5 M in THF) and the mixture was heated at 55 °C for 11hr. This solution was then added to a flame dried sealed tube that contained 3-Bromoanisole (0.144 mL, 1.30 mmol, 250 mol%), Pd<sup>(0)</sup>(PPh<sub>3</sub>)<sub>4</sub> (61 mg, 0.052 mmol, 10 mol%), NaOH (0.86 mL, 1.72 mmol, 330 mol%, 2.0 M aq. sol.), and THF (2.1 mL, 0.25 M with respect to TBS protected alcohol **4a**) under a atmosphere of nitrogen. The reaction mixture was vigorously degassed with nitrogen, capped, heated to 70 °C and let stir for 22 hr. The reaction was cooled to room temperature, filtered through a plug of celite with DCM and concentrated *in vacuo*. Purification of the residue by flash column chromatography (SiO<sub>2</sub>; 15% Tol/Hex) furnished the title compound (201 mg, 0.389 mmol) as a colorless oil in 75% yield.

**<sup>1</sup>H NMR** (400 MHz, CDCl<sub>3</sub>): δ 7.30-7.10 (m, 9H), 6.98-6.96 (m, 2H), 6.70-6.66 (m, 2H), 6.49 (s, 1H), 4.09 (d, *J* = 9.6, 1H), 3.71 (s, 3H), 2.80 (dd, *J* = 14.0, 8.0, 1H), 2.59 (dd, *J* = 14.0, 7.6, 1H), 2.15-2.05 (m, 1H), 1.12-1.08 (m, 1H), 1.10 (d, *J* = 4.2 Hz, 3H), 0.75 (s, 9H), 0.13 (s, 3H), -0.01 (s, 3H), -0.13 (s, 3H), -0.42 (s, 3H).

**<sup>13</sup>C NMR** (100 MHz, CDCl<sub>3</sub>): δ 159.7, 145.1, 144.8, 139.1, 134.0, 129.3, 128.8, 128.1, 128.0, 127.4, 122.0, 114.8, 111.9, 79.4, 55.3, 41.3, 31.5, 28.2, 26.1, 18.4, 14.7, -3.0, -3.1, -4.4, -4.7.

**FTIR** (neat): 2954, 2855, 1600, 1583, 1489, 1454, 1427, 1256, 1151, 1110, 1074, 1048, 872, 833, 811, 772, 754, 733, 699 cm<sup>-1</sup>.

**HRMS** (CI) Calcd. for C<sub>32</sub>H<sub>46</sub>O<sub>2</sub>Si<sub>2</sub> [M-1]<sup>+</sup>: 517.2958, Found: 517.2959.

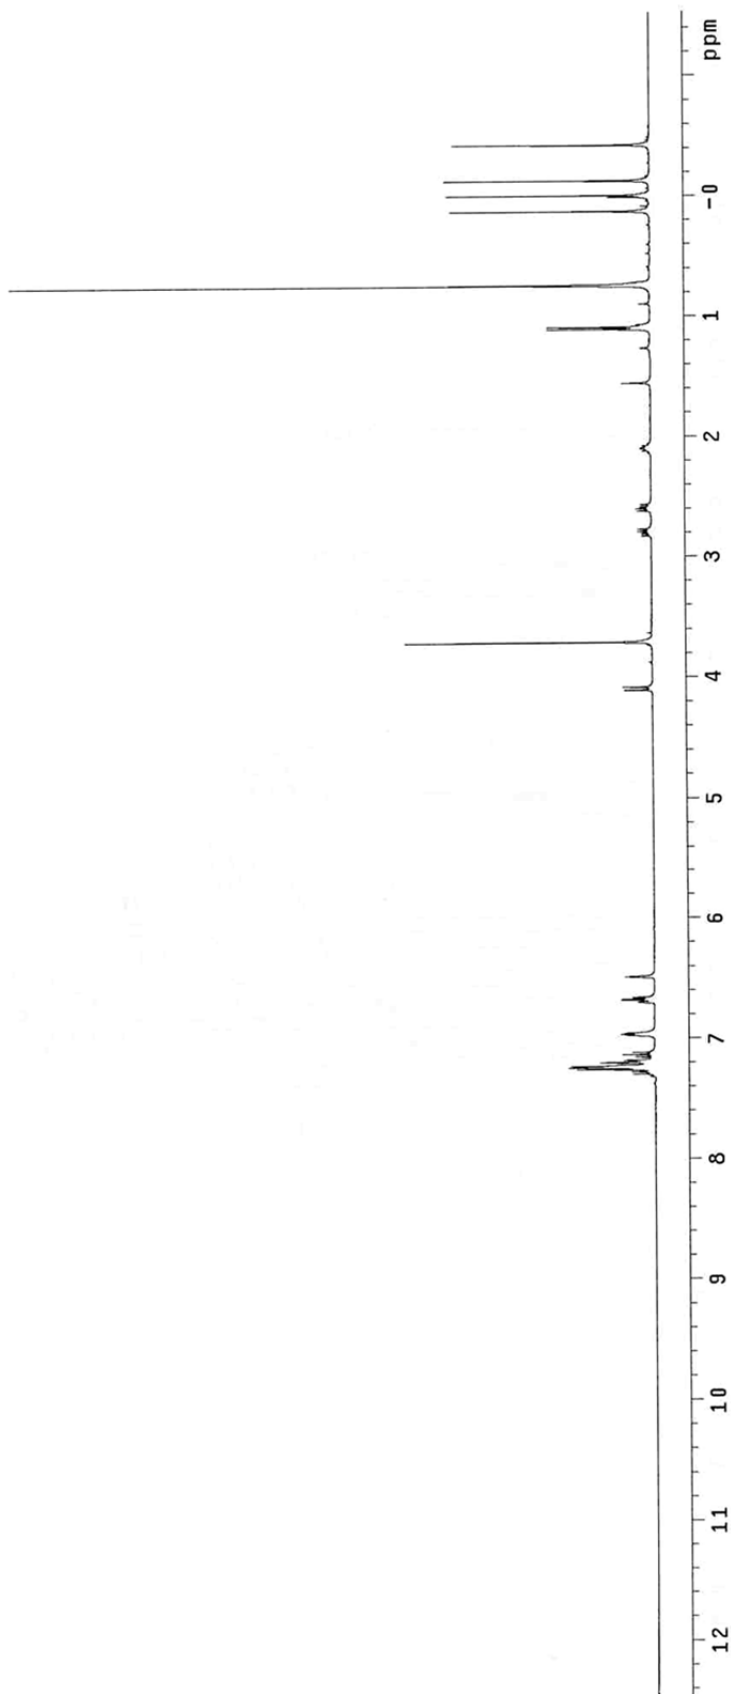

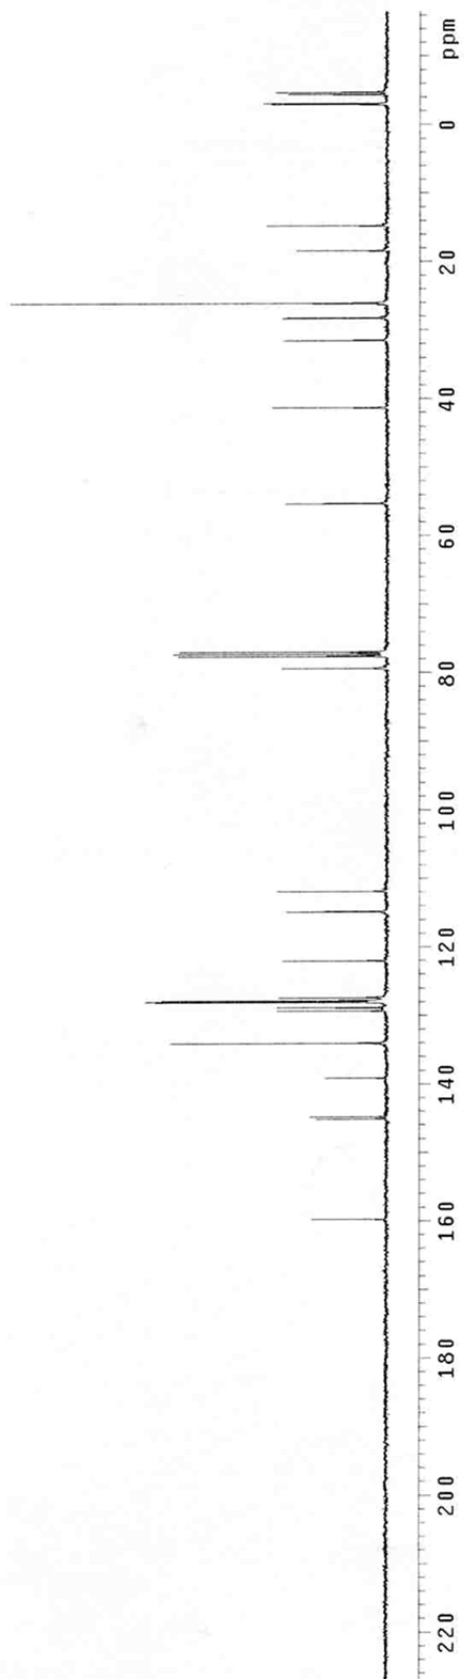

**tert-butyl((3-(dimethyl(phenyl)silyl)-2-methyl-1-phenylhex-5-en-1-yl)oxy)dimethylsilane (5b)**

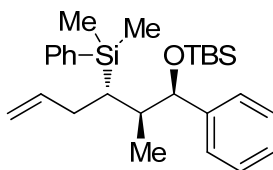

A flame dried 25 mL conical flask equipped with a magnetic stir bar was charged with TBS protected alcohol **4a** (45 mg, 0.11 mmol, 100 mol%) and purged with nitrogen. 9-BBN was added (0.66 mL, 0.33 mmol, 300 mol%, 0.5 M in THF) and the mixture was heated at 55 °C for 5 hr. This solution was then added to a flame dried sealed tube that contained Pd<sup>(0)</sup>(PPh<sub>3</sub>)<sub>4</sub> (13 mg, 0.011 mmol, 10 mol%), NaOH (0.18 mL, 0.36 mmol, 330 mol%, 2.0 M aq. sol.), and THF (0.22 mL, 0.5 M with respect to TBS protected alcohol **4a**) under a atmosphere of nitrogen. The reaction mixture was vigorously degassed with nitrogen and vinyl bromide (0.28 mL, 0.28 mmol, 250 mol%, 1.0 M in THF) was added. The sealed tube was capped, heated to 70 °C and let stir for 22 hr. The reaction was cooled to room temperature, filtered through a plug celite with DCM and concentrated *in vacuo*. Purification of the residue by flash column chromatography (SiO<sub>2</sub>; hexane) furnished the title compound (27 mg, 0.062 mmol) as a colorless oil in 56% yield.

**<sup>1</sup>H NMR** (400 MHz, CDCl<sub>3</sub>): δ 7.30-7.12 (m, 8H), 7.10-7.04 (m, 2H), 5.65-5.55 (m, 1H), 4.90 (dd, *J* = 16.8, 1.6, 1H), 4.82 (dd, *J* = 11.6, 1.6, 1H), 4.35 (dd, *J* = 9.2, 1.6, 1H), 2.22-2.15 (m, 1H), 2.07-1.99 (m, 1H), 1.96-1.87 (m, 1H), 0.99 (d, *J* = 6.8 Hz, 3H), 0.80-.70 (m, 1H), 0.71 (s, 9H), 0.09 (s, 3H), 0.07 (s, 3H), -0.12 (s, 3H), -0.41 (s, 3H).

**<sup>13</sup>C NMR** (75 MHz, CDCl<sub>3</sub>): δ 144.9, 141.2, 139.2, 134.1, 128.9, 128.1, 127.8, 127.3, 114.8, 79.6, 41.4, 30.5, 26.1, 25.8, 18.4, 14.0, -2.6, -2.9, -4.4, -4.7.

**FTIR** (neat): 2955, 2928, 2856, 1490, 1471, 1453, 1427, 1360, 1249, 1078, 1056, 1027, 1004, 908, 835, 812, 700 cm<sup>-1</sup>.

**HRMS** (CI) Calcd. for C<sub>27</sub>H<sub>42</sub>OSi<sub>2</sub> [M-1]<sup>+</sup>: 437.2696, Found: 437.2698.



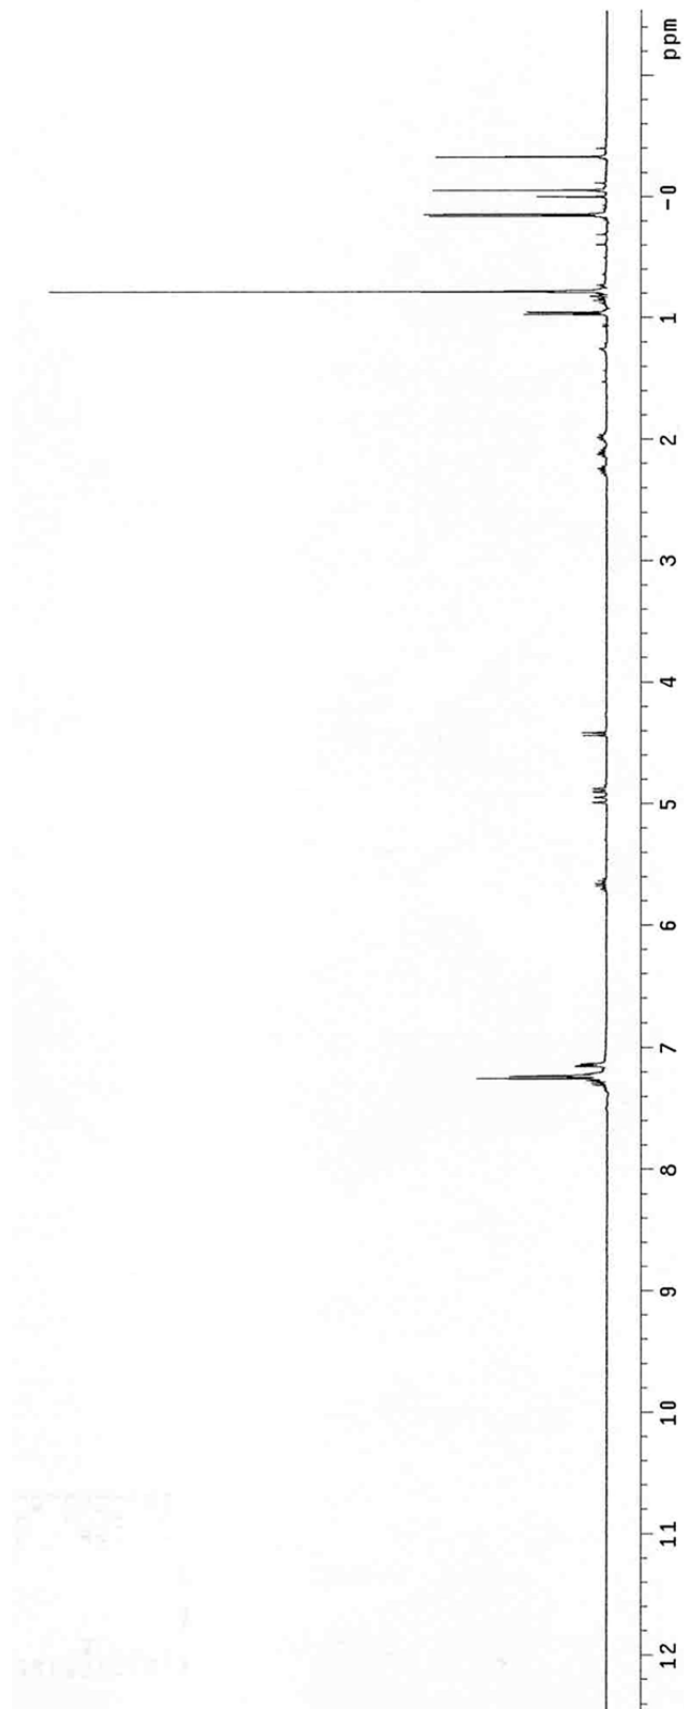

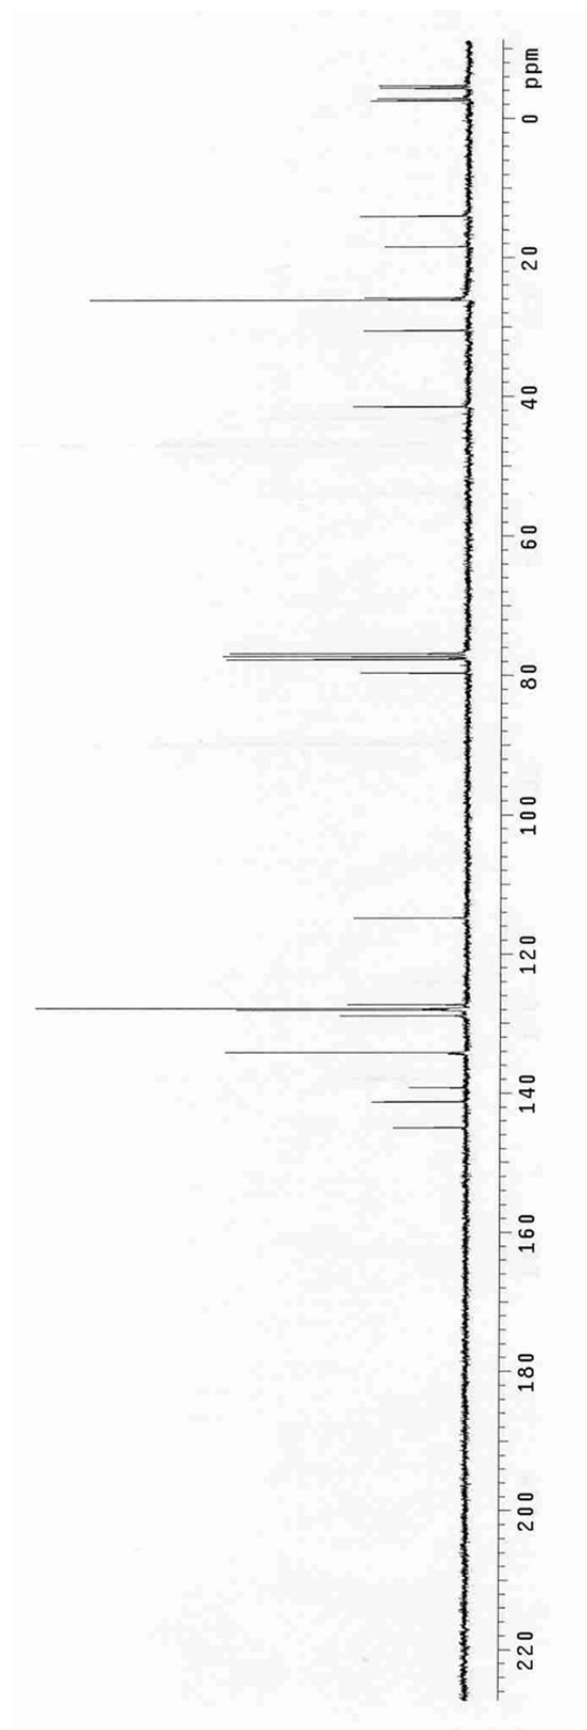

## 4-(3-methoxyphenyl)-2-methyl-1-phenylbutane-1,3-diol (6a)

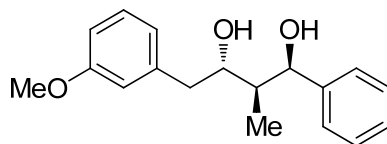

A flame dried 25 mL round bottom flask equipped with a magnetic stir bar was charged with KH (85 mg, 0.636 mmol, 600 mol%, 30% in mineral oil) and purged with nitrogen. NMP was added (1.3 mL, 0.1 M with respect to compound **5a**) and cooled to 0 °C. To this solution *t*-butyl hydroperoxide (0.212 mL, 0.636 mmol, 600 mol%, 3.0 M in Tol) was added and stirred for 10 min. Compound **5a** (55 mg, 0.106 mmol, 100 mol%) was added to the reaction as a solution in NMP (0.2 mL), warmed to room temperature and stirred for 15 min. TBAF (0.318 mL, 0.318 mmol, 300 mol%, 1.0 M in THF) was added and the reaction was heated to 70 °C for 2 hr. Upon complete consumption of starting material, as determined by TLC analysis, Na<sub>2</sub>S<sub>2</sub>O<sub>5</sub> (1.5 mL, sat. aq. sol.) was added. The organic layer was extracted with Et<sub>2</sub>O (4 x 50 mL) and the combined organic extracts were dried (MgSO<sub>4</sub>), filtered and concentrated *in vacuo*. Purification of the residue by flash column chromatography (SiO<sub>2</sub>; 5-30% EA/Hex) provided the title compound (26 mg, 0.091 mmol) as a colorless oil in 86% yield.

**<sup>1</sup>H NMR** (400 MHz, CDCl<sub>3</sub>): δ 7.37-7.32 (m, 4H), 7.28-7.24 (m, 2H), 6.85-6.78 (m, 3H), 5.25 (d, *J* = 2.4, 1H), 3.89-3.85 (m, 1H), 3.81 (s, 3H), 3.40-3.20 (bs, 1H), 2.97 (dd, *J* = 17.2, 13.4, 1H), 2.82 (dd, *J* = 22.8, 13.4, 1H), 2.40-2.20 (bs, 1H), 1.99-1.91 (m, 1H), 0.91 (d, *J* = 7.2 Hz, 3H).

**<sup>13</sup>C NMR** (100 MHz, CDCl<sub>3</sub>): δ 159.9, 142.9, 139.8, 129.8, 128.1, 126.9, 122.0, 121.4, 121.7, 115.0, 112.1, 76.1, 74.2, 55.2, 43.8, 42.1, 11.2.

**FTIR** (neat): 3361, 2923, 1601, 1584, 1489, 1452, 1436, 1259, 1153, 1090, 1066, 1043, 977, 777, 748, 734, 700 cm<sup>-1</sup>.

**HRMS** (CI) Calcd. for C<sub>18</sub>H<sub>22</sub>O<sub>3</sub> [M-1]<sup>+</sup>: 286.1569, Found: 286.1568.

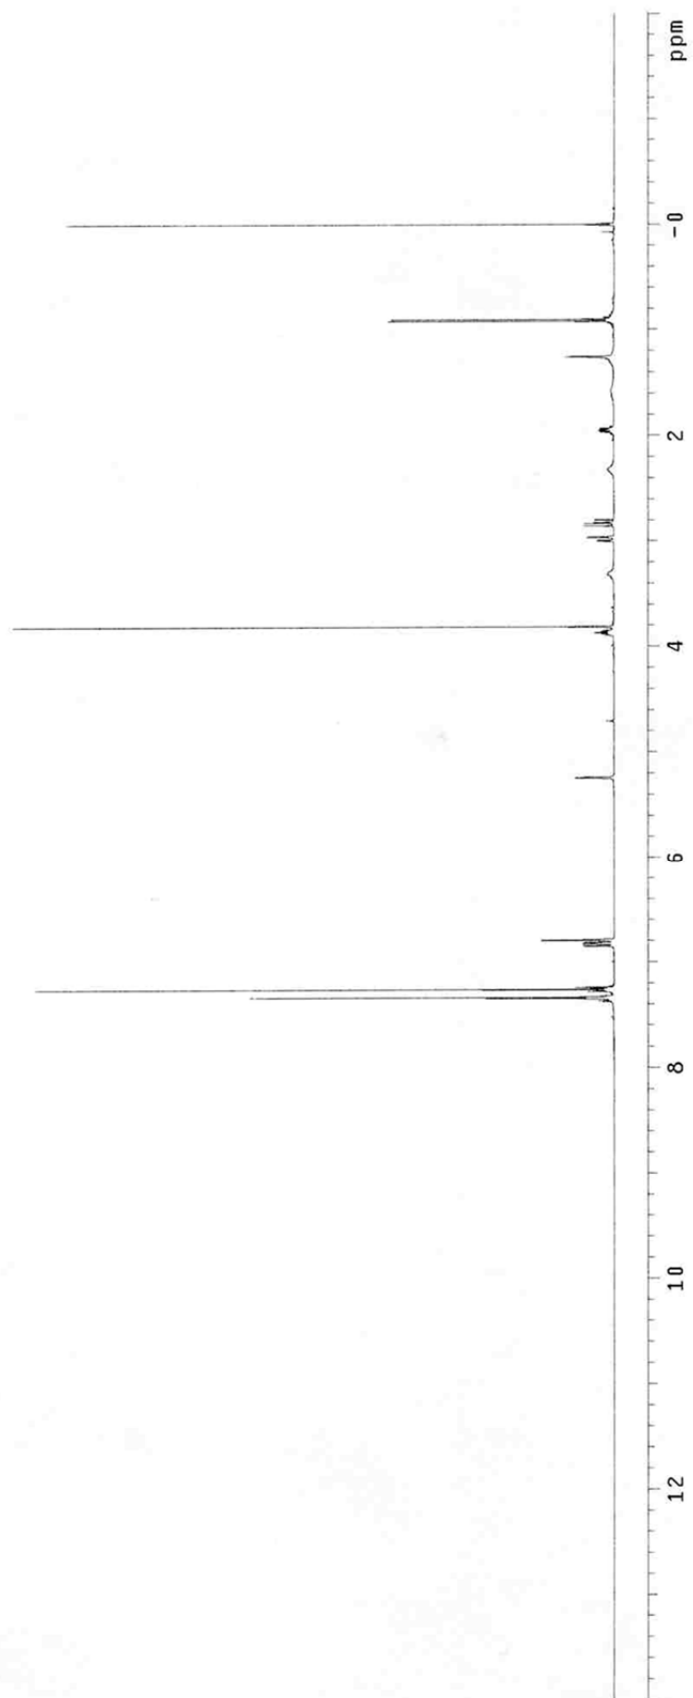

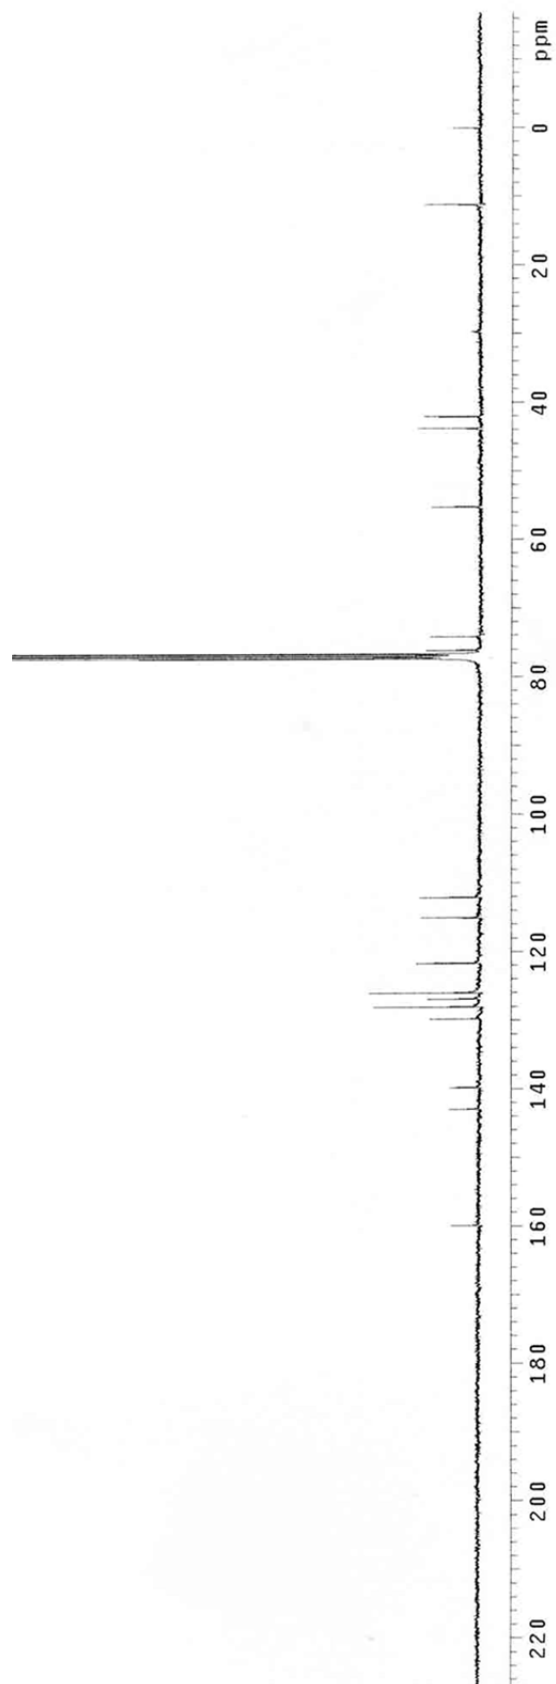

**2-methyl-1-phenylhex-5-ene-1,3-diol (6b)**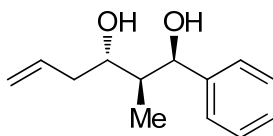

A flame dried 25 mL round bottom flask equipped with a magnetic stir bar was charged with KH (46 mg, 0.342 mmol, 600 mol%, 30% in mineral oil) and purged with nitrogen. NMP was added (0.6 mL, 0.1 M with respect to compound **5b**) and cooled to 0 °C. To this solution *t*-butyl hydroperoxide (0.155 mL, 0.343 mmol, 600 mol%, 3 M in Tol) was added and stirred for 10 min. Compound **5b** (25 mg, 0.057 mmol, 100 mol%) was added to the reaction as a solution in NMP (0.1 mL), warmed to room temperature and stirred for 15 min. TBAF (0.171 mL, 0.171 mmol, 300 mol%, 1.0 M in THF) was added and the reaction was heated to 70 °C for 2 hr. Upon complete consumption of starting material, as determined by TLC analysis, Na<sub>2</sub>S<sub>2</sub>O<sub>5</sub> (1.5 mL, sat. aq. sol.) was added. The organic layer was extracted with EtOAc (4 x 50 mL) and the combined organic extracts were dried (MgSO<sub>4</sub>), filtered and concentrated *in vacuo*. Purification of the residue by flash column chromatography (SiO<sub>2</sub>; 5-20% EA/Hex) provided the title compound (9 mg, 0.044 mmol) as a colorless oil in 77% yield.

**<sup>1</sup>H NMR** (400 MHz, CDCl<sub>3</sub>): δ 7.40-7.30 (m, 4H), 7.28-7.22 (m, 1H), 5.82-5.80 (m, 1H), 5.24 -5.21 (m, 1H), 5.19 (t, *J* = 1.0 Hz, 1H), 5.16 (d, *J* = 2.8 Hz, 1H), 3.72-3.67 (m, 1H), 2.49-2.43 (m, 1H), 2.38-2.31 (m, 1H), 1.96-1.86 (m, 1H), 0.84 (d, *J* = 7.6 Hz, 3H).

**<sup>13</sup>C NMR** (100 MHz, CDCl<sub>3</sub>): δ 142.8, 134.6, 128.0, 126.9, 126.0, 118.8, 74.4, 73.7, 43.5, 40.0, 11.1.

**FTIR** (neat): 3347, 2976, 2906, 1697, 1493, 1451, 1316, 1261, 1092, 1065, 1025, 975, 915, 700 cm<sup>-1</sup>.

**HRMS** (CI) Calcd. for C<sub>13</sub>H<sub>18</sub>O<sub>2</sub> [M-1]<sup>+</sup>: 205.1229, Found: 205.1231.

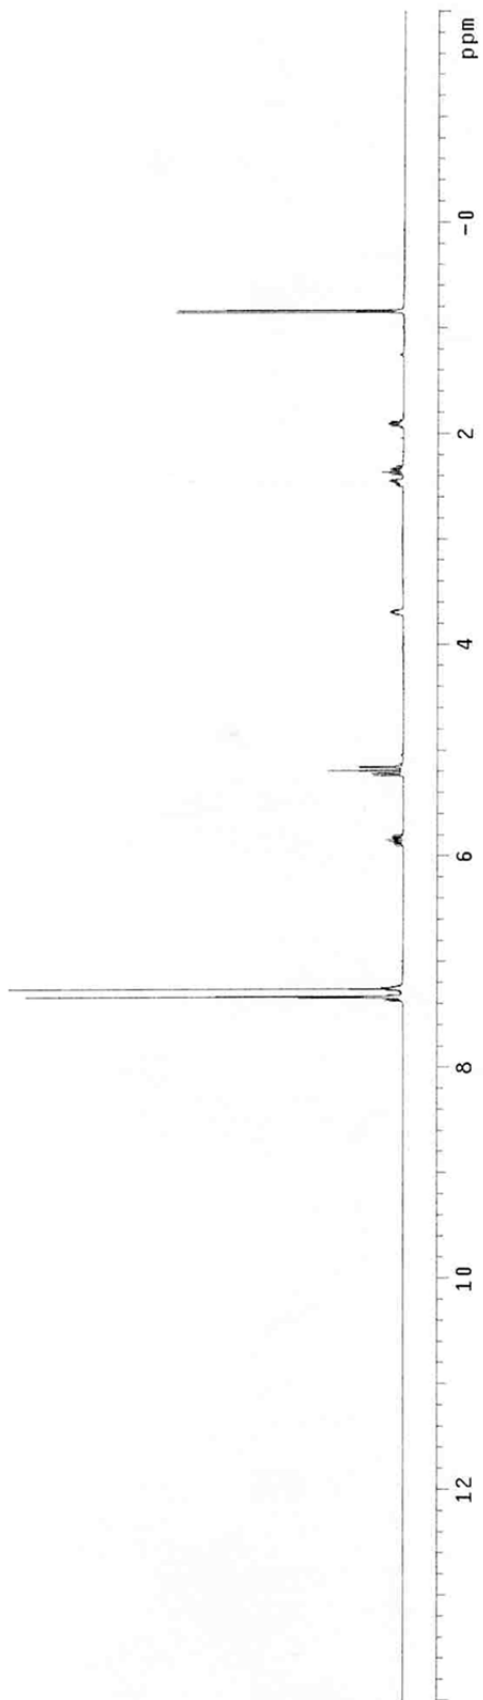

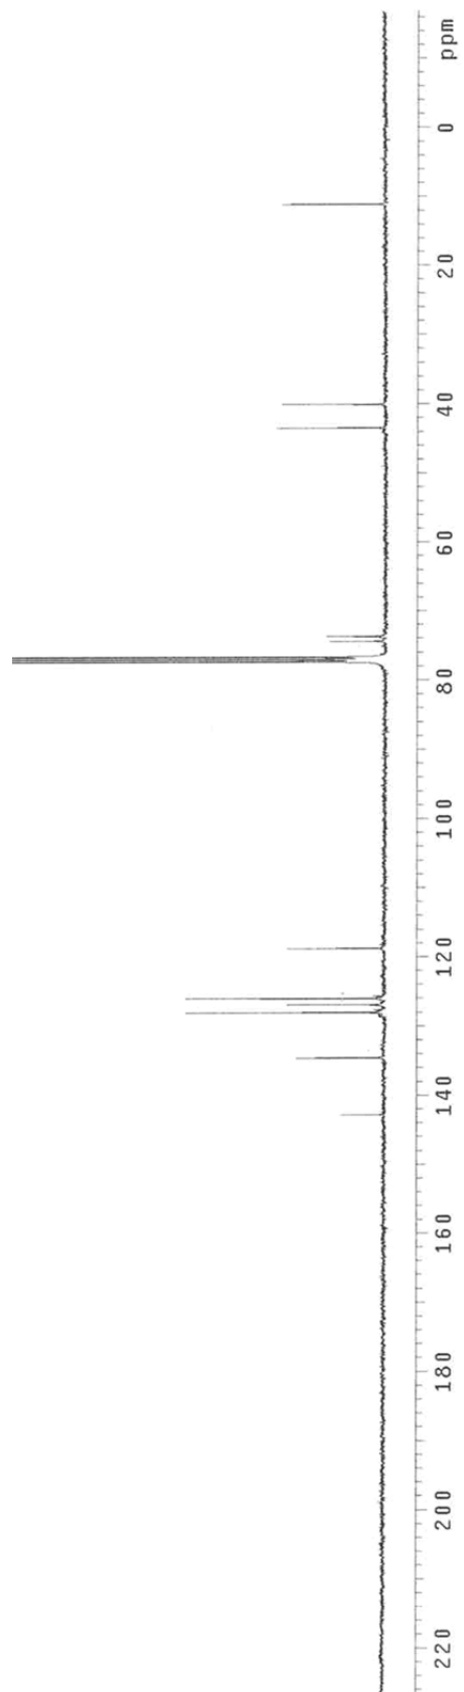

Supplement: NIHMS301079-supplement-1_si_001.pdf [file NIHMS301079-supplement-1_si_001.pdf]
